# Supplementary material for: Genome-wide analyses identify a role for SLC17A4 and AADAT in thyroid hormone regulation
Source: Springer Nature journal article supplement (doi:10.1038/s41467-018-06356-1), 2018-10-22
Supplement: MOESM1 [file 41467_2018_6356_MOESM1_ESM.pdf › 41467_2018_6356_MOESM1_ESM.pdf]

# **Genome-wide analyses identify a role for SLC17A4 and AADAT in thyroid hormone regulation**

Teumer *et al.*

SUPPLEMENTARY INFORMATION

## Table of Contents

**SUPPLEMENTARY NOTE 1: DETAILED RESULTS OF MOUSE CANDIDATE ANALYSES**

**SUPPLEMENTARY NOTE 2: PATHWAY ANALYSES RESULTS**

**SUPPLEMENTARY NOTE 3: LOOKUP FOR PLEIOTROPY OF NOVEL LOCI**

**SUPPLEMENTARY NOTE 4: EXTENDED ACKNOWLEDGEMENTS**

**SUPPLEMENTARY FIGURE 1: SCHEMATIC OF THE PROJECT**

**SUPPLEMENTARY FIGURE 2: REGIONAL ASSOCIATION PLOTS FOR TSH**

**SUPPLEMENTARY FIGURE 3: REGIONAL ASSOCIATION PLOTS FOR FT4**

**SUPPLEMENTARY FIGURE 4: FOREST PLOTS FOR TSH**

**SUPPLEMENTARY FIGURE 5: FOREST PLOTS FOR FT4**

**SUPPLEMENTARY FIGURE 6: MANHATTAN PLOTS FOR GWAS META-ANALYSES IN THE SEX-STRATIFIED SAMPLES**

**SUPPLEMENTARY FIGURE 7: GENES RELATED TO ABNORMAL THYROID MORPHOLOGY IN GENETICALLY MANIPULATED MICE ARE ENRICHED FOR SNPs SIGNIFICANTLY ASSOCIATED WITH TSH CONCENTRATIONS IN HUMANS**

**SUPPLEMENTARY FIGURE 8: MANHATTAN PLOT FOR GWAS META-ANALYSES FOR HYPO- VS. HYPERTHYROIDISM**

**SUPPLEMENTARY FIGURE 9: THYROID HORMONE TRANSPORT BY MCT8 IN COMPARISON TO HSLC17A4**

**SUPPLEMENTARY FIGURE 10: QQ PLOTS FOR ALL GWAS META-ANALYSES IN THE OVERALL SAMPLES**

**SUPPLEMENTARY FIGURE 11: QQ PLOTS FOR ALL GWAS META-ANALYSES IN THE SEX-STRATIFIED SAMPLES**

**SUPPLEMENTARY FIGURE 12: RESULTS OF PATHWAY ANALYSES**

**SUPPLEMENTARY TABLE 1: GENOME-WIDE SIGNIFICANT INDEX SNPs FOR TSH AFTER FINAL STAGE**

**SUPPLEMENTARY TABLE 2: GENOME-WIDE SIGNIFICANT INDEX SNPs FOR FT4 AFTER FINAL STAGE**

**SUPPLEMENTARY TABLE 3: DISTRIBUTION OF SEX AND AGE GROUP FOR HYPO- AND HYPERTHYROIDISM GWAS CASES AND CONTROLS**

**SUPPLEMENTARY TABLE 4: GENOME-WIDE SIGNIFICANT INDEX SNPs FOR HYPO- AND HYPERTHYROIDISM**

**SUPPLEMENTARY TABLE 5: LOOKUP OF TSH ASSOCIATED SNPs IN GRAVES' DISEASE AND TPOAB POSITIVITY**

**SUPPLEMENTARY TABLE 6: ASSOCIATION OF SLC17A4 AND AADAT HITS WITH T3 AND T3/T4 RATIO**

**SUPPLEMENTARY TABLE 7: GRS ASSOCIATION WITH HYPO- AND HYPERTHYROIDISM**

**SUPPLEMENTARY TABLE 8: ASSOCIATION RESULTS OF TSH-BASED GENETIC RISK SCORE**

**SUPPLEMENTARY TABLE 9: ASSOCIATION RESULTS OF FT4-BASED GENETIC RISK SCORE**

**SUPPLEMENTARY TABLE 10: REPLICATION RESULTS OF GWAS SNPs**

**SUPPLEMENTARY REFERENCES**

### **Supplementary Note 1: Detailed results of mouse candidate analyses**

In this candidate gene approach we selected genes that are linked to abnormal thyroid physiology (i.e., hormone levels,  $n=26$ ) or morphology ( $n=51$ ) in mice to assess whether their human homologs contained SNPs significantly associated with FT4 and TSH in our GWAS. For FT4, variants in 6 and 3 genes and for TSH in 4 and 5 genes (**Supplementary Data 2**) from the abnormal murine thyroid physiology and morphology list, respectively, showed significant association (**Supplementary Figure 7A**). Four of them (*TPO*, *CGA*, *TRHR*, and *FOXE1*) did not reach genome-wide significance in the full TSH or FT4 GWAS. Notably, *CGA* and *TRHR* were never been detected by previous GWAS of thyroid function or thyroid diseases. Both *CGA* and *TRHR* represent excellent biological candidates; *CGA* codes for the alpha chain of TSH, and *TRHR* for the thyrotropin (TSH) releasing hormone receptor expressed in the pituitary. To validate these four additional associations, we sought replication of the variants in 9,011 (TSH) and 4,532 (FT4) independent samples. As shown in **Supplementary Figure 7B and C**, both *CGA* and *TPO* achieved genome-wide significance for TSH ( $p < 5 \times 10^{-8}$ ), whereas *TRHR* approached this threshold for FT4 ( $p = 5.7 \times 10^{-8}$ , **Supplementary Data 2**).

### **Supplementary Note 2: Pathway analyses results**

Top canonical pathways identified for the TSH hits included G-protein signaling and ephrin receptor signaling, both important for neurogenesis and neuronal sustainability during development, as well as cardiac beta-adrenergic signaling (**Supplemental Figure 12A**), which overlap with the top pathways revealed for hyperthyroidism. The top canonical pathways identified for FT4 did not overlap with those for TSH but partially with those for hypothyroidism and included thyroid hormone metabolism and biosynthesis, and thyroid hormone receptor/retinoid-X receptor activation. The canonical pathway related to tRNA splicing overlapped with both hypo- and hyperthyroidism, whereas other pathways like

cAMP-mediated signaling and T-cell receptor signaling were specific for hyperthyroidism and hypothyroidism, respectively. For TSH, the top networks incorporated genes involved in embryonic development, cell cycle control and cell fate decision. For FT4, the top networks incorporated genes encoding proteins involved in endocrine system development and function as well as molecular transport and small molecule biochemistry.

The DEPICT results assessing tissue-specificity of the GWAS results did not reveal any associations that passed the significance level after multiple testing correction (all false discovery rates were  $\geq 0.2$ ). However, the only thyroid tissue related association with a nominal significant p-value was found for the TSH GWAS results with thyroid gland, which was also the strongest tissue enrichment for this trait (**Supplemental Figure 12B**). Additionally, nominally significant tissue enrichment was revealed in the pancreas in which also AADAT and SLC17A4 co-localized.

### **Supplementary Note 3: Lookup for pleiotropy of novel loci**

Pleiotropic effects of the novel loci associated with TSH included body height (*ADCY9*, *MIR365A*), waist circumference (*ADCY9*), type II diabetes (*IGF2BP2*), as well as age at menarche (*MIR365A*) and ovarian cancer (*NSF*), and intracranial volume and Parkinson's disease (*NSF*). Loci associated with FT4 were also associated with body height, body mass index, proinsulin and high-density lipoprotein (*FNBP4*), with blood metabolite levels (*ACMSD*: N1-methyl-3-pyridone-4-carboxamide, *SLCO1B1*: isoleucine), and serum urate and hemoglobin levels (*SLC17A4*). The loci associated with hypo- or hyperthyroidism were almost exclusively additionally associated with thyroid related traits including TSH levels, thyroid volume and thyroid cancer. The detailed results of genome-wide significant pleiotropic effects are provided in **Supplementary Data 5**, and a description of the new loci with respect to gene function is provided in **Supplementary Data 6**.



#### **Supplementary Note 4: Extended acknowledgements**

The Genotype-Tissue Expression (GTEx) Project was supported by the Common Fund of the Office of the Director of the National Institutes of Health, and by NCI, NHGRI, NHLBI, NIDA, NIMH, and NINDS.

##### ARIC

The Atherosclerosis Risk in Communities Study is carried out as a collaborative study supported by National Heart, Lung, and Blood Institute contracts (HHSN268201100005C, HHSN268201100006C, HHSN268201100007C, HHSN268201100008C, HHSN268201100009C, HHSN268201100010C, HHSN268201100011C, and HHSN268201100012C), R01HL087641, R01HL59367 and R01HL086694; National Human Genome Research Institute contract U01HG004402; and National Institutes of Health contract HHSN268200625226C. The authors thank the staff and participants of the ARIC study for their important contributions. Infrastructure was partly supported by Grant Number UL1RR025005, a component of the National Institutes of Health and NIH Roadmap for Medical Research. Reagents for the thyroid assays in the ARIC study were donated by Roche Diagnostics. Dr. Selvin was supported by NIH/NIDDK grants K24DK106414 and R01DK089174. Dr. Köttgen was supported by DFG grants KO 3598/3-1 (Heisenberg professorship), CRC 1140 and CRC 992. The work of Dr. Li was supported by DFG grant KO 3598/4-1.

##### ASKLEPIOS

The Asklepios study was supported by grants from the Research Foundation Flanders (FWO G.0427.03 and G.0838.10N). A full list of Asklepios investigators can be found with Rietzschel et al.<sup>1</sup>

##### BHS

The 1994/1995 Busselton Health Survey was supported and funded by the Health Promotion

Foundation of Western Australia.

### BioBank Japan Project

This research was supported by the Tailor-Made Medical Treatment program (the BioBank Japan Project) of the Ministry of Education, Culture, Sports, Science, and Technology (MEXT) and the Japan Agency for Medical Research and Development (AMED), and a grant from the Ministry of Health, Welfare, and Labour for the Scientific Research Project for Longevity (NH: 1999-2003). Yukinori Okada was supported by the Japan Society for the Promotion of Science (JSPS) KAKENHI (15H05670, 15H05907, 15H05911, 15K14429, 16H03269, and 16K15738), AMED (16km0405206h0001, 16gm6010001h0001, and 17ek0410041h0001), Takeda Science Foundation, the Uehara Memorial Foundation, the Naito Foundation, Daiichi Sankyo Foundation of Life Science, and Senri Life Science Foundation.

### CHRIS

The CHRIS (Cooperative Health Research In South Tyrol) study is a collaborative effort between the Eurac Research Institute for Biomedicine and the Healthcare System of the Autonomous Province of Bolzano. The study investigators wish to thank all study participants, all general practitioners of the middle and upper Vinschgau/Val Venosta, the personnel of the hospital of Schlanders/Silandro, and the personnel of the department of laboratory medicine of the hospital of Meran/Merano for their support. Full acknowledgments are reported here: <https://translational-medicine.biomedcentral.com/articles/10.1186/s12967-015-0704-9#Declarations>. The CHRIS study was funded by the Department of Innovation, Research and University of the Autonomous Province of Bolzano-South Tyrol.

### CHS

This research was supported by contracts HHSN268201200036C, HHSN268200800007C,

N01HC55222, N01HC85079, N01HC85080, N01HC85081, N01HC85082, N01HC85083, N01HC85086, and grants U01HL080295 U01HL130114 and R01AG027058 from the National Heart, Lung, and Blood Institute (NHLBI), with additional contribution from the National Institute of Neurological Disorders and Stroke (NINDS). Additional support was provided by R01AG023629 from the National Institute on Aging (NIA). Support for the Cardiovascular Health Study Whole Genome Study was provided by NHLBI grant HL087652. Additional support for infrastructure was provided by HL105756 and additional genotyping among the African-American cohort was supported in part by HL085251. DNA handling and genotyping at Cedars-Sinai Medical Center was supported in part by National Center for Research Resources grant UL1RR033176, now at the National Center for Advancing Translational Technologies CTSI grant UL1TR001881; in addition to the National Institute of Diabetes and Digestive and Kidney Diseases grant DK063491 to the Southern California Diabetes Endocrinology Research Center. A full list of principal CHS investigators and institutions can be found at CHS-NHLBI.org. The content is solely the responsibility of the authors and does not necessarily represent the official views of the National Institutes of Health.

#### GARP

We thank all study participants of the GARP study. This research in GARP was supported by the Leiden University Medical Centre, the Dutch Arthritis Foundation (DAF-10-1-402; DAF-15-4-401) and Pfizer Inc., Groton, CT, USA. Additional funding contributions came from the Netherlands Organization of Scientific Research (MW 904-61-095, 911-03-016, 917-66-344 and 911-03-012; ZonMW VICI scheme 91816631/528), the “Centre of Medical System Biology” and the “Netherlands Consortium of Healthy Aging” in the framework of the Netherlands Genomics Initiative (NGI).

#### GCKD

We thank the patients, study personnel and the large number of nephrologists who all contribute to the GCKD study (<http://www.gckd.org>). The GCKD study is funded by grants from the German Ministry of Education and Research (BMBF, grant number 01ER0804), the KfH Foundation for Preventive Medicine and corporate partners. Genotyping was supported by Bayer Pharma AG. The work of Dr. Schultheiss was funded by the CRC 1140 of the German Research Foundation (DFG) and by the Else Kroener Fresenius Foundation (EKFK NAKSYS). The work of J. Jing was funded by the Chinese Scholarship Council.

#### HBCS

We thank all study participants as well as everybody involved in the Helsinki Birth Cohort Study. Helsinki Birth Cohort Study has been supported by grants from the Academy of Finland, the Finnish Diabetes Research Society, Folkhälsan Research Foundation, Novo Nordisk Foundation, Finska Läkaresällskapet, Juho Vainio Foundation, Signe and Ane Gyllenberg Foundation, University of Helsinki, Ministry of Education, Ahokas Foundation, Emil Aaltonen Foundation.

#### Health2006

The Health2006 study was financially supported by grants from the Velux Foundation; the Danish Medical Research Council, Danish Agency for Science, Technology and Innovation; the Aase and Ejner Danielsens Foundation; ALK-Abello A/S (Hørsholm, Denmark), Timber Merchant Vilhelm Bangs Foundation, MEKOS Laboratories (Denmark) and Research Centre for Prevention and Health, the Capital Region of Denmark. The Novo Nordisk Foundation Center for Basic Metabolic Research is an independent Research Center at the University of Copenhagen partially funded by an unrestricted donation from the Novo Nordisk Foundation ([www.metabol.ku.dk](http://www.metabol.ku.dk)).

#### Inter99

We acknowledge all members of the Inter99 team and the steering committee of the Inter99 study: Torben Jørgensen, DMSc (PI), Knut Borch-Johnsen, DMSc (Co-PI), Hans Ibsen, DMSc, Troels Thomsen, Ph.D, Charlotta Pisinger, PhD and Charlotte Glümer, PhD. The study was initiated and analyzed by the investigators in this project. The work was supported economically by: The Danish Medical Research Council, The Danish Centre for Evaluation and Health Technology Assessment, Novo Nordisk, Copenhagen County, The Danish Heart Foundation, The Danish Pharmaceutical Association, Augustinus foundation, Ib Henriksen foundation and Becket foundation. The Novo Nordisk Foundation Center for Basic Metabolic Research is an independent Research Center at the University of Copenhagen partially funded by an unrestricted donation from the Novo Nordisk Foundation ([www.metabol.ku.dk](http://www.metabol.ku.dk)).

#### KORA

The KORA research platform was initiated and financed by the Helmholtz Center Munich, by the German Research Center for Environmental Health, which is funded by the German Federal Ministry of Education and Research, and by the State of Bavaria. The work of KORA is supported by the German Federal Ministry of Education and Research (BMBF) in the context of the German National Genome Research Network (NGFN-2 and NGFN-plus). Our research was supported within the Munich Center of Health Sciences (MC Health) as part of LMUinnovativ. Thyroid examinations were funded by Sanofi-Aventis within the framework of the Papillon Initiative.

#### LBC1921 and LBC1936

We thank the cohort participants and team members who contributed to these studies. Phenotype collection in the Lothian Birth Cohort 1921 was supported by the UK's Biotechnology and Biological Sciences Research Council (BBSRC), The Royal Society, and The

Chief Scientist Office of the Scottish Government. Phenotype collection in the Lothian Birth Cohort 1936 was supported by Age UK (The Disconnected Mind project). Genotyping of the cohorts was funded by the BBSRC (BB/F019394/1). The work was undertaken by The University of Edinburgh Centre for Cognitive Ageing and Cognitive Epidemiology, part of the cross council Lifelong Health and Wellbeing Initiative (MR/K026992/1). Funding from the BBSRC and Medical Research Council (MRC) is gratefully acknowledged.

### LifeLines

The Lifelines Cohort Study, and generation and management of GWAS genotype data for the Lifelines Cohort Study is supported by the Netherlands Organization of Scientific Research NWO (grant 175.010.2007.006), the Economic Structure Enhancing Fund (FES) of the Dutch government, the Ministry of Economic Affairs, the Ministry of Education, Culture and Science, the Ministry for Health, Welfare and Sports, the Northern Netherlands Collaboration of Provinces (SNN), the Province of Groningen, University Medical Center Groningen, the University of Groningen, Dutch Kidney Foundation and Dutch Diabetes Research Foundation. We thank Behrooz Alizadeh, Annemieke Boesjes, Marcel Bruinenberg, Noortje Festen, Pim van der Harst, Ilja Nolte, Lude Franke, Mitra Valimohammadi for their help in creating the GWAS database, and Rob Bieringa, Joost Keers, René Oostergo, Rosalie Visser, Judith Vonk for their work related to data collection and validation. The authors are grateful to the study participants, the staff from the Lifelines Cohort Study and the contributing research centers delivering data to Lifelines and the participating general practitioners and pharmacists. Statistical analyses were carried out on the Genetic Cluster Computer (<http://www.geneticcluster.org>) hosted by SURFsara and financially supported by the Netherlands Scientific Organization (NWO 480-05-003 PI: Posthuma) along with a supplement from the Dutch Brain Foundation and the VU University Amsterdam.

Lifelines Cohort Study group authors: Behrooz Z Alizadeh, H Marike Boezen, Lude Franke, Pim van der Harst, Gerjan Navis, Marianne Rots, Harold Snieder, Ronald P Stolk, Morris Swertz, Bruce HR Wolffenbuttel, Cisca Wijmenga.

### LLS

The Leiden Longevity Study has received funding from the European Union's Seventh Framework Programme (FP7/2007-2011) under grant agreement number 259679. This study was financially supported by the Innovation-Oriented Research Program on Genomics (SenterNovem IGE05007), the Centre for Medical Systems Biology and the Netherlands Consortium for Healthy Ageing (grant 050-060-810), all in the framework of the Netherlands Genomics Initiative, Netherlands Organization for Scientific Research (NWO), by Unilever Colworth and by BBMRI-NL, a Research Infrastructure financed by the Dutch government (NWO 184.021.007).

### MICROS

The MICROS (Microisolates in South Tyrol) study investigators wish to thank all study participants, the general practitioners and the personnel of the Hospital of Silandro (Department of Laboratory Medicine) for their participation and collaboration in the research project. The study was supported by the Ministry of Health and Department of Educational Assistance, University and Research of the Autonomous Province of Bolzano, the South Tyrolean Sparkasse Foundation, and the European Union framework program 6 EUROSPAN project (contract no. LSHG-CT-2006-018947).

### NBS

The Nijmegen Biomedical Study is a population-based survey conducted at the Department for Health Evidence and the Department of Laboratory Medicine of the Radboud university medical center. Principal investigators of the Nijmegen Biomedical Study are L.A.L.M.

Kiemeney, A.L.M. Verbeek, D.W. Swinkels en B. Franke.

### PROSPER

The PROSPER study was supported by an investigator initiated grant obtained from Bristol-Myers Squibb. Prof. Dr. J. W. Jukema is an Established Clinical Investigator of the Netherlands Heart Foundation (grant 2001 D 032). Support for genotyping was provided by the seventh framework program of the European commission (grant 223004) and by the Netherlands Genomics Initiative (Netherlands Consortium for Healthy Aging grant 050-060-810).

### Rotterdam Study

The Rotterdam Study<sup>2</sup> is funded by Erasmus Medical Center and Erasmus University, Rotterdam, Netherlands Organization for the Health Research and Development (ZonMw), the Research Institute for Diseases in the Elderly (RIDE), the Ministry of Education, Culture and Science, the Ministry for Health, Welfare and Sports, the European Commission (DG XII), and the Municipality of Rotterdam. The authors are grateful to the study participants, the staff from the Rotterdam Study and the participating general practitioners and pharmacists.

The Rotterdam Study has been approved by the Medical Ethics Committee of the Erasmus MC (registration number MEC 02.1015) and by the Dutch Ministry of Health, Welfare and Sport (Population Screening Act WBO, license number 1071272-159521-PG). The Rotterdam Study has been entered in the Netherlands National Trial Register (NTR; <http://www.trialregister.nl>) and in the WHO International Clinical Trials Registry Platform (ICTRP; <http://www.who.int/ictip/network/primary/en/>) under shared catalogue number NTR6831. All participants provided written informed consent to participate in the study and to have their information obtained from treating physicians.

The generation and management of GWAS genotype data for the Rotterdam Study (RS I, RS



II, RS III) was executed by the Human Genotyping Facility of the Genetic Laboratory of the Department of Internal Medicine, Erasmus MC, Rotterdam, The Netherlands. The GWAS datasets are supported by the Netherlands Organisation of Scientific Research NWO Investments (nr. 175.010.2005.011, 911-03-012), the Genetic Laboratory of the Department of Internal Medicine, Erasmus MC, the Research Institute for Diseases in the Elderly (014-93-015; RIDE2), the Netherlands Genomics Initiative (NGI)/Netherlands Organisation for Scientific Research (NWO) Netherlands Consortium for Healthy Aging (NCHA), project nr. 050-060-810. We thank Pascal Arp, Mila Jhamai, Marijn Verkerk, Lizbeth Herrera and Marjolein Peters, MSc, and Carolina Medina-Gomez, MSc, for their help in creating the GWAS database, and Karol Estrada, PhD, Yurii Aulchenko, PhD, and Carolina Medina-Gomez, MSc, for the creation and analysis of imputed data.

This study makes use of sequence reference data generated by the UK10K Consortium, derived from samples from the ALSPAC and TwinsUK datasets. A full list of the investigators who contributed to the generation of the data is available from [www.UK10K.org](http://www.UK10K.org). Funding for UK10K was provided by the Wellcome Trust under award WT091310. We thank Jie Huang at the Wellcome Trust's Sanger Institute, at Hinxton, U.K. for the creation of imputed data, with the support of Marijn Verkerk, Carolina Medina-Gomez, MSc, and Anis Abuseiris and their input for the analysis setup.

This study makes use of an extended dataset of RS II and RS III samples based on Illumina Omni 2.5 and 5.0 GWAS genotype data, imputed to 1KG using the two-phase imputation method<sup>3</sup>. This dataset was funded by the Genetic Laboratory of the Department of Internal Medicine, the department of Forensic Molecular Biology, and the department of Dermatology, Erasmus MC, Rotterdam, The Netherlands. This work was supported by a grant from the Netherlands Organisation for Health Research and Development (project number

113303005) (to WEV) and from the Sherman Foundation (to WEV). We thank Linda Broer, PhD, for the creation of imputed data, with the support of Marijn Verkerk and Carolina Medina-Gomez, MSc, for the analysis setup.

We would like to thank Karol Estrada PhD, Fernando Rivadeneira PhD, and Anis Abuseiris (Erasmus MC Rotterdam, The Netherlands), for their help in creating GRIMP, and we thank BigGRID for access to their grid computing resources<sup>4</sup>.

### SardiNIA

The SardiNIA project is supported in part by the intramural program of the National Institute on Aging through contracts N01-AG-1-2109 and HHSN271201100005C to the Consiglio Nazionale delle Ricerche of Italy. The SardiNIA authors would like to thank the CRS4 HPC group in Italy for the computational infrastructure supporting this project, and all volunteers who generously participated in the study.

### SHIP/SHIP-Trend

SHIP is part of the Community Medicine Research net of the University of Greifswald, Germany, which is funded by the Federal Ministry of Education and Research (grants no. 01ZZ9603, 01ZZ0103, and 01ZZ0403), the Ministry of Cultural Affairs as well as the Social Ministry of the Federal State of Mecklenburg-West Pomerania, and the network 'Greifswald Approach to Individualized Medicine (GANI\_MED)' funded by the Federal Ministry of Education and Research (grant 03IS2061A). Genome-wide data have been supported by the Federal Ministry of Education and Research (grant no. 03ZIK012) and a joint grant from Siemens Healthineers, Erlangen, Germany and the Federal State of Mecklenburg-West Pomerania. The University of Greifswald is a member of the Caché Campus program of the InterSystems GmbH.

### SIBLOS

The SIBLing Osteoporosis Study (SIBLOS) was designed to investigate the genetic and environmental determinants of bone metabolism and hormonal exposure in men. This study is supported by grants from the Fund for Scientific Research – Flanders (FWO-Vlaanderen grants #G.0662.07 and #G.0867.11). The authors are indebted to K Toye, K Mertens, E Vandersypt, and M Becque for their excellent technical assistance, and all the volunteers for participation in the study.

#### TwinsUK

TwinsUK is funded by the Wellcome Trust, Medical Research Council, European Union, the National Institute for Health Research (NIHR)-funded BioResource, Clinical Research Facility and Biomedical Research Centre based at Guy's and St Thomas' NHS Foundation Trust in partnership with King's College London. This research was also supported by the Australian National Health and Medical Research Council (Project Grant 1087407), the Sir Charles Gairdner Hospital RAC (SGW) and the iVEC/Pawsey Supercomputing Centre (Project Grants: Pawsey0162, Director2025 (SGW)).

#### Val Borbera

Val Borbera is an isolated valley in North Western Italy. We thank all the participants in the project, the San Raffaele Hospital MDs who contributed to clinical data collection, Prof. Clara Camaschella who coordinated the data collection, Corrado Masciullo and Massimiliano Cocca for the database informatics. The research was supported by funds from Compagnia di San Paolo, Torino, Italy; Fondazione Cariplo, Italy; Telethon Italy; Ministry of Health, Ricerca Finalizzata 2008 and 2011-2012 and Public Health Genomics Project 2010.

**Supplementary Figure 1: Schematic of the project**

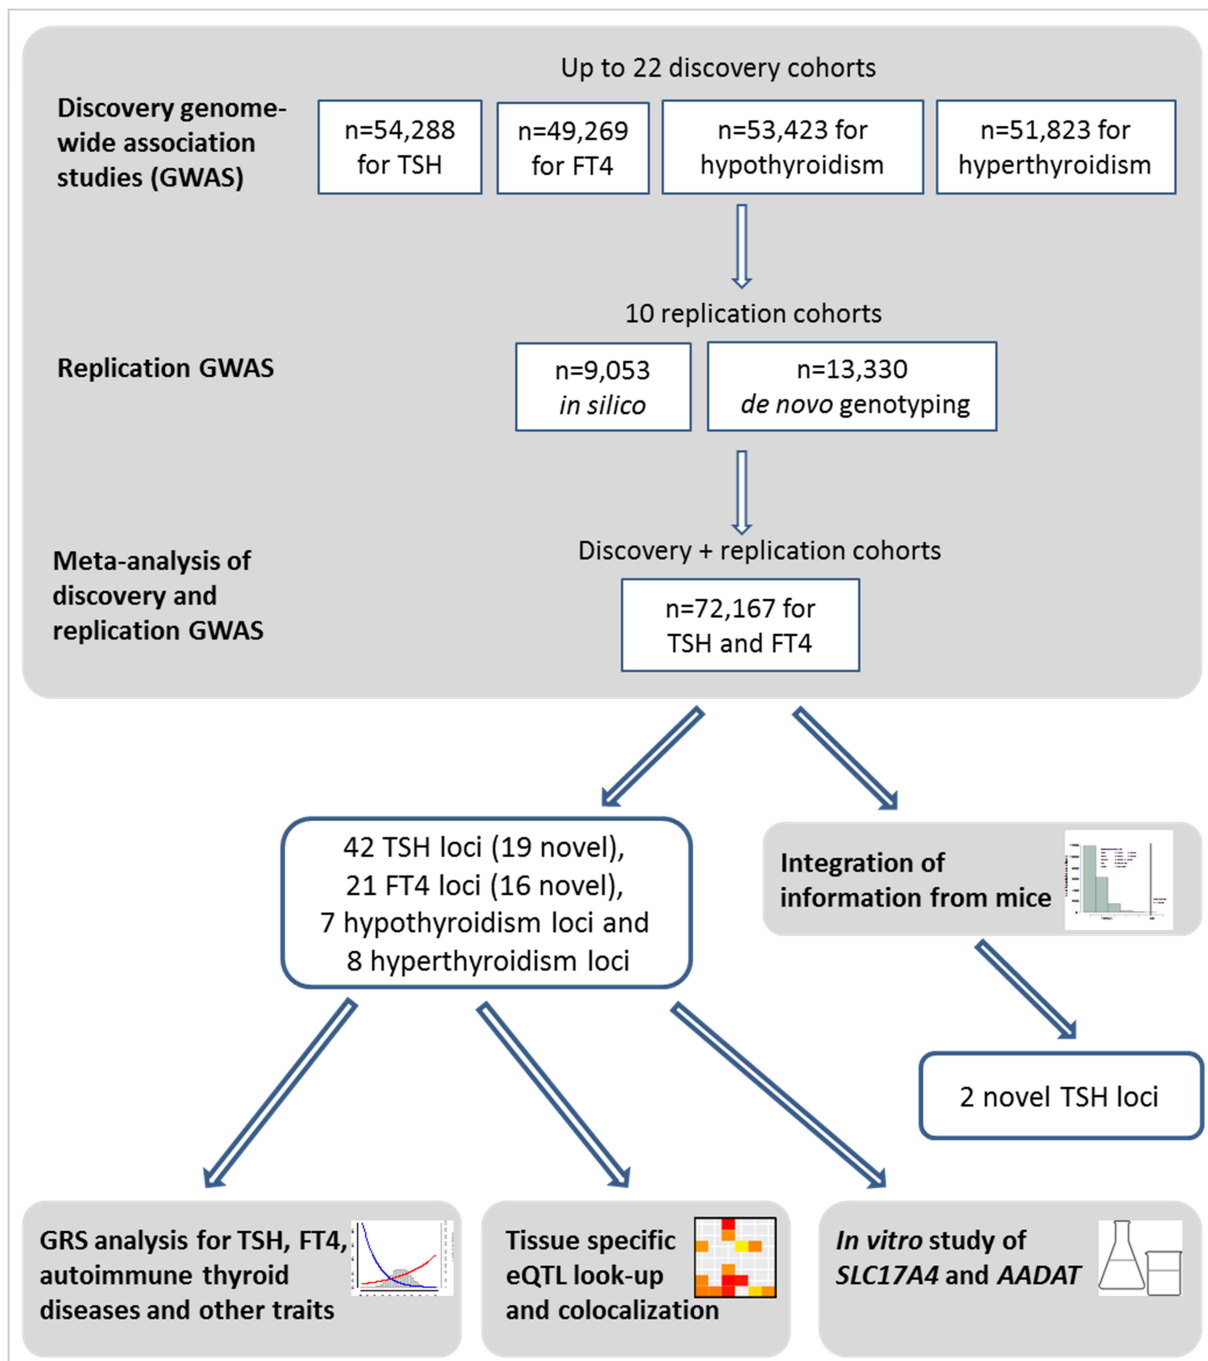

Overview of the workflow of the project showing its major sub-analyses.

## Supplementary Figure 2: Regional association plots for TSH

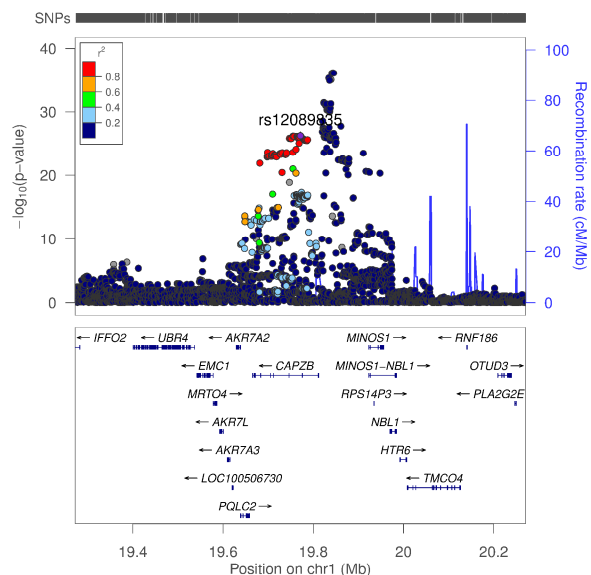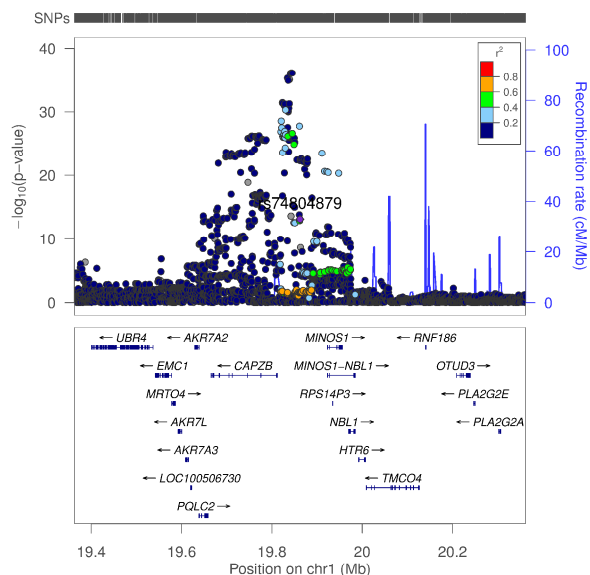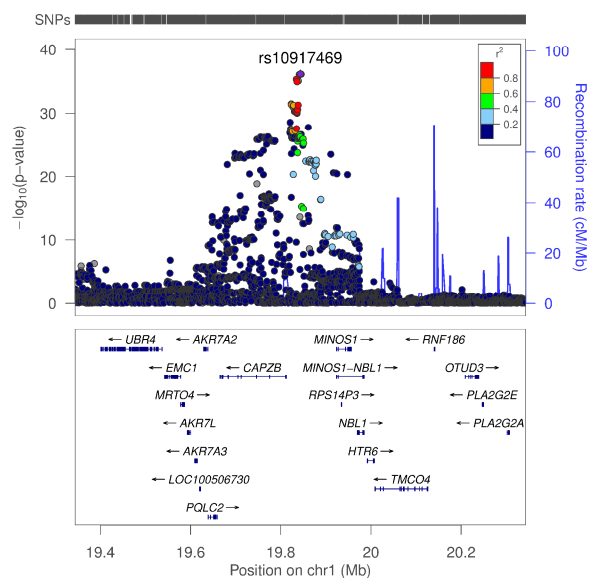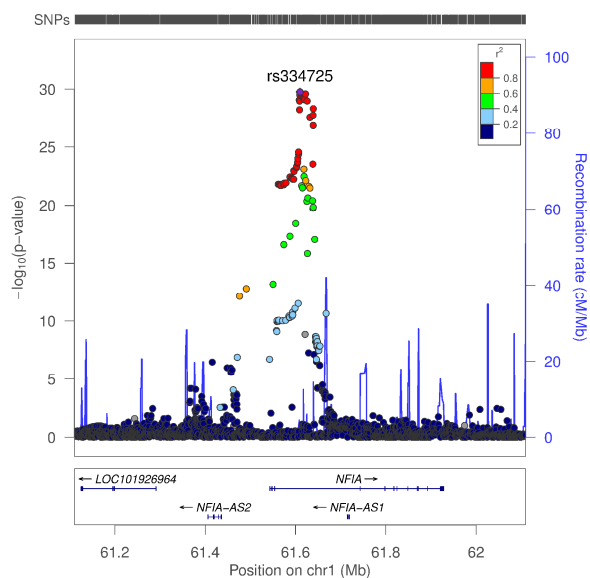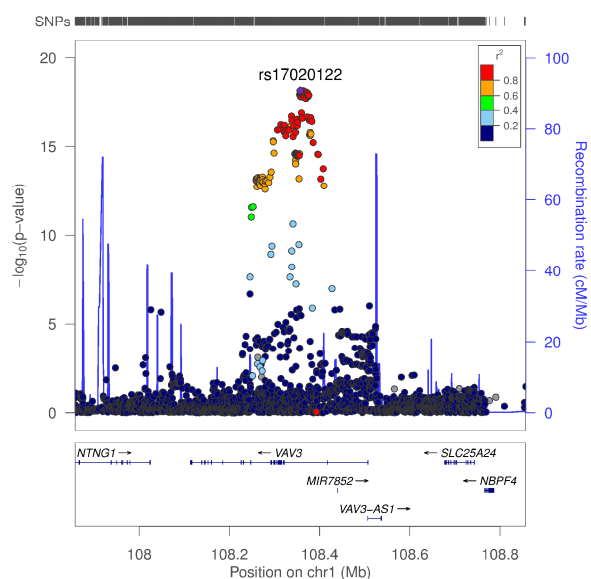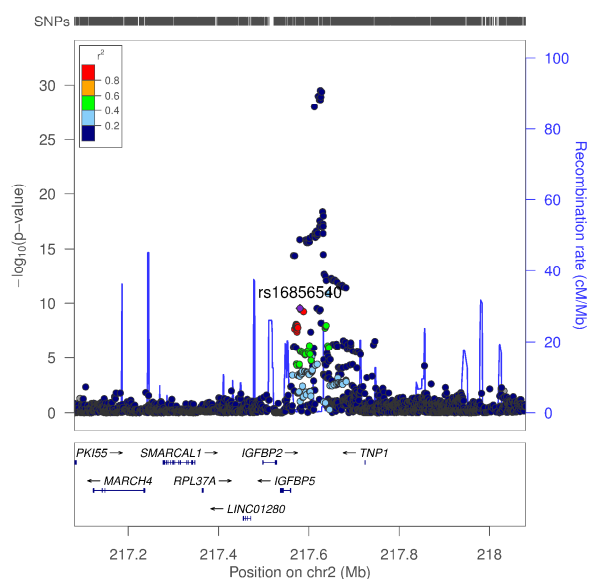

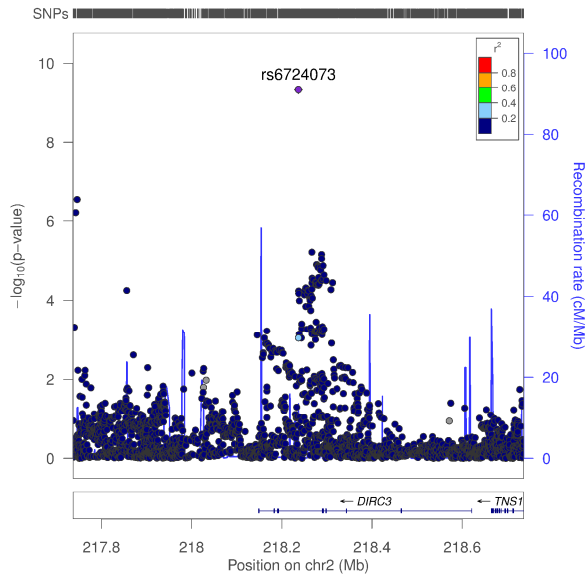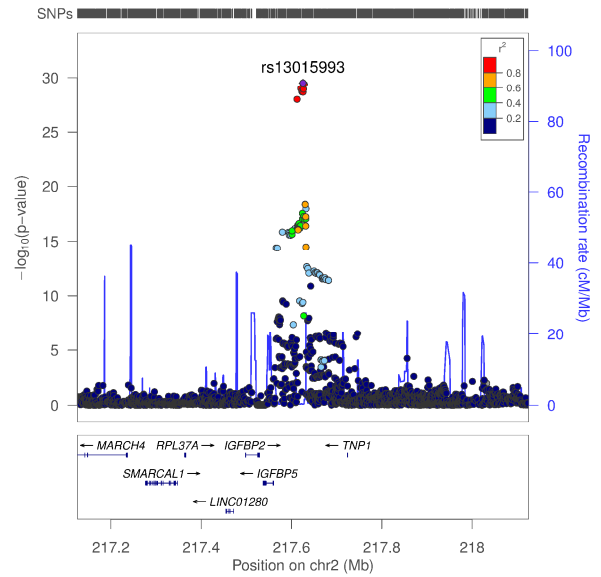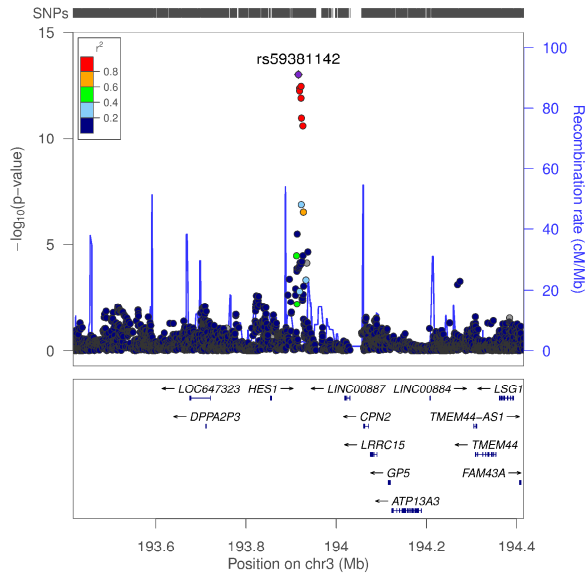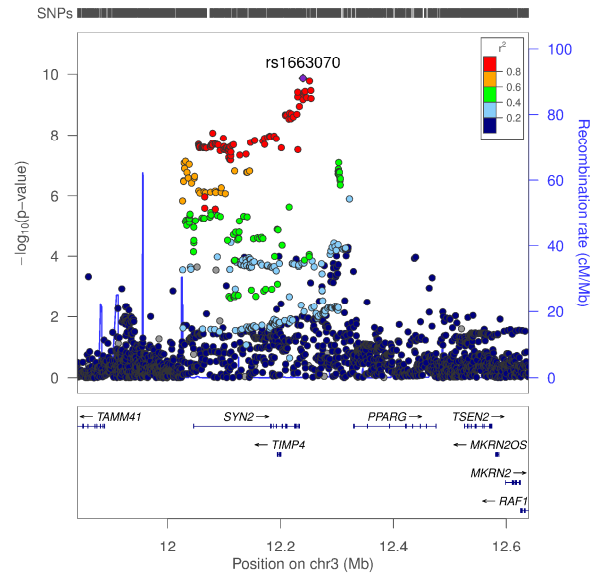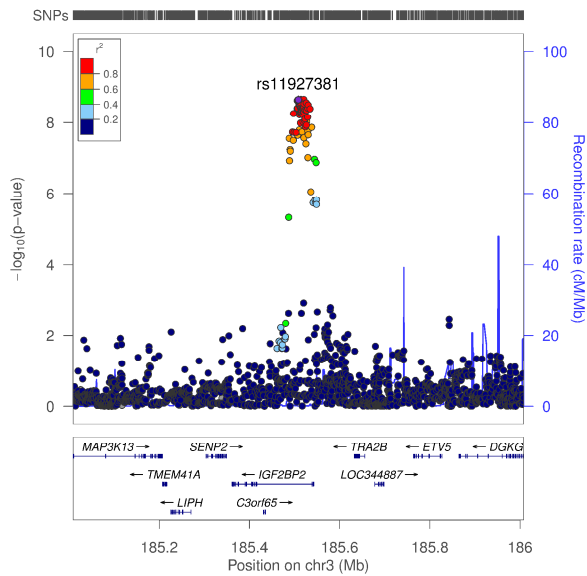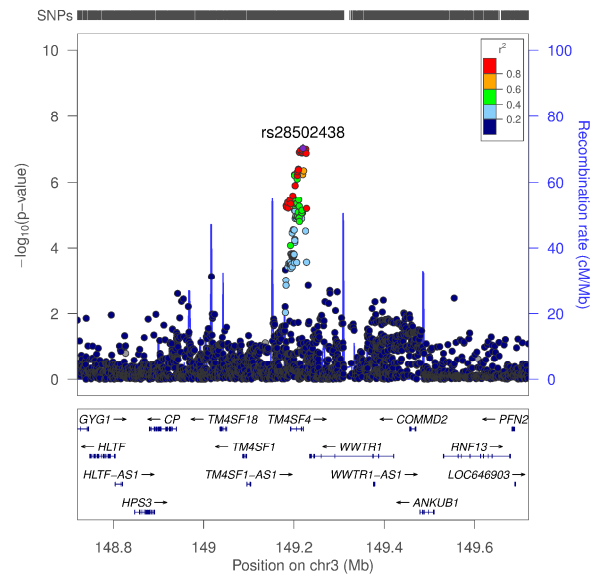

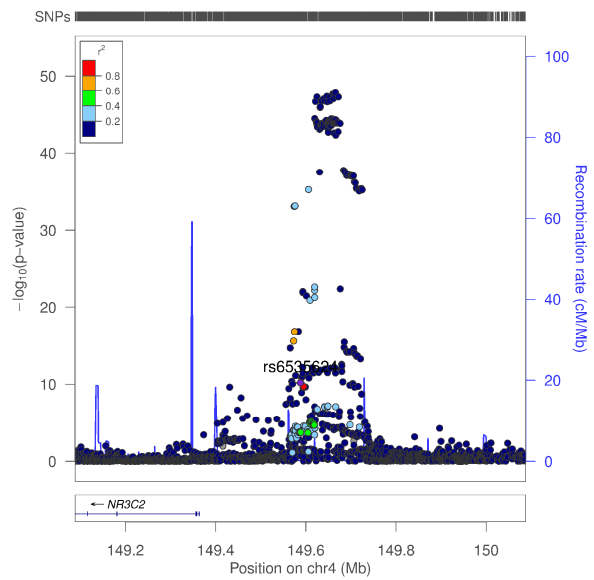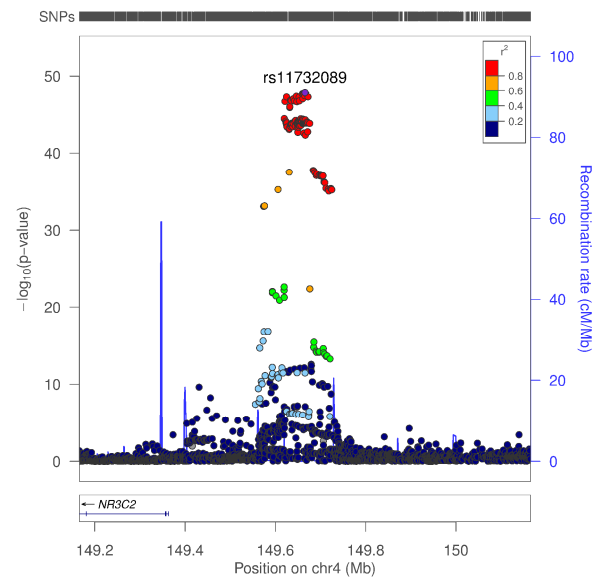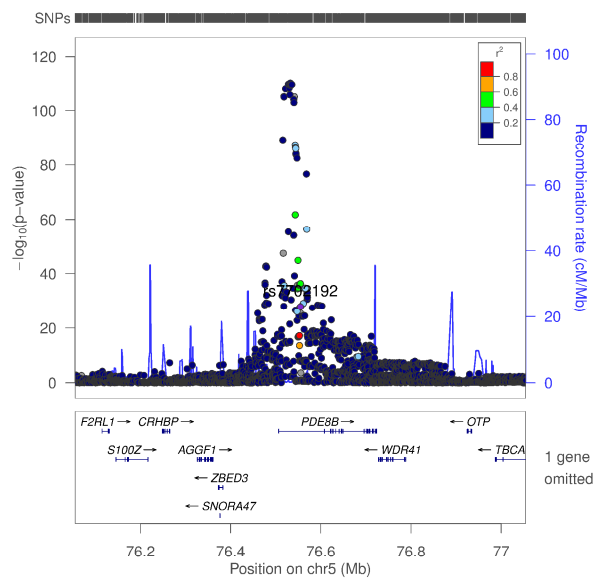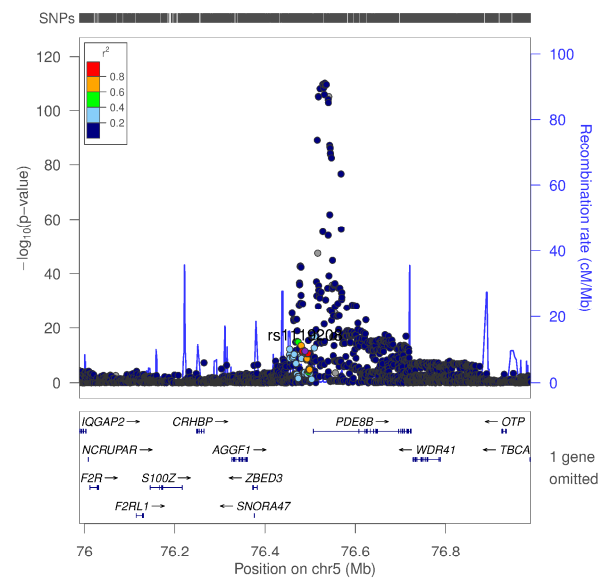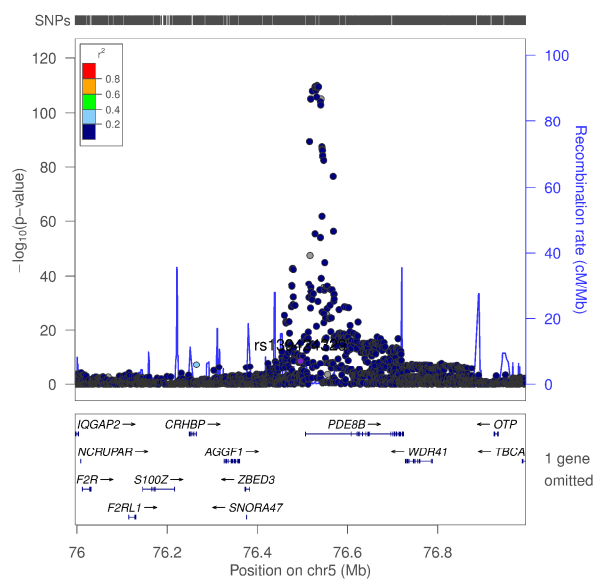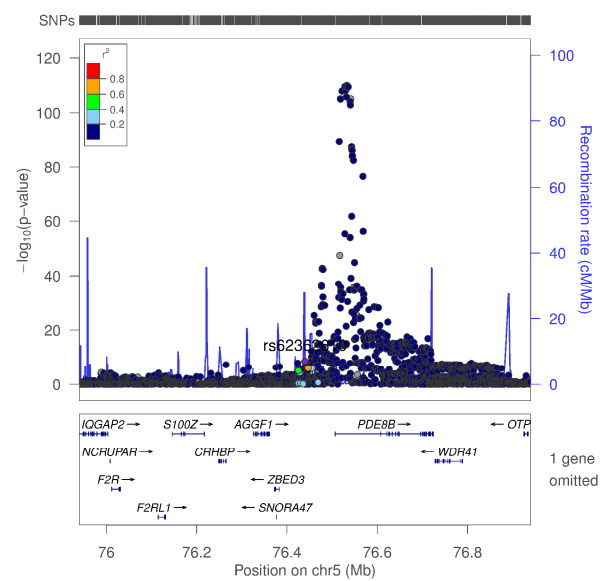



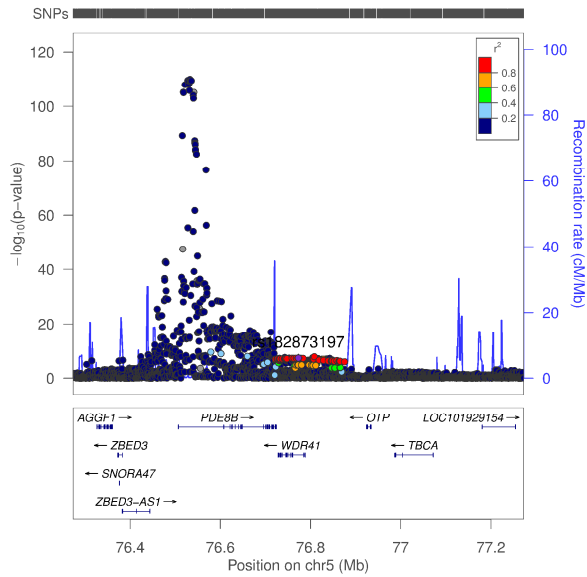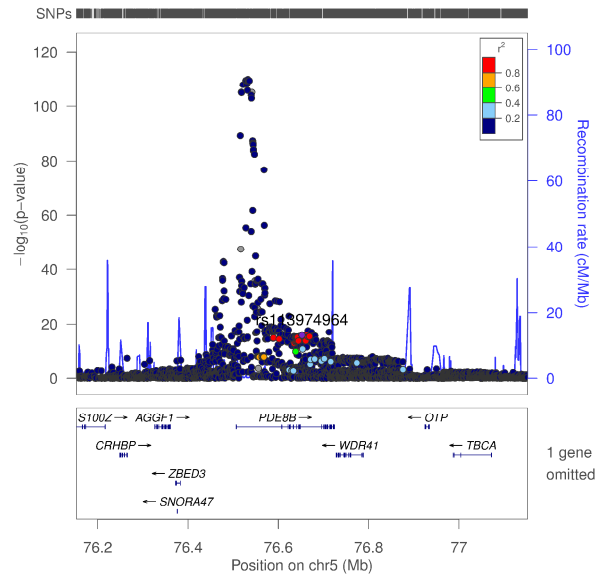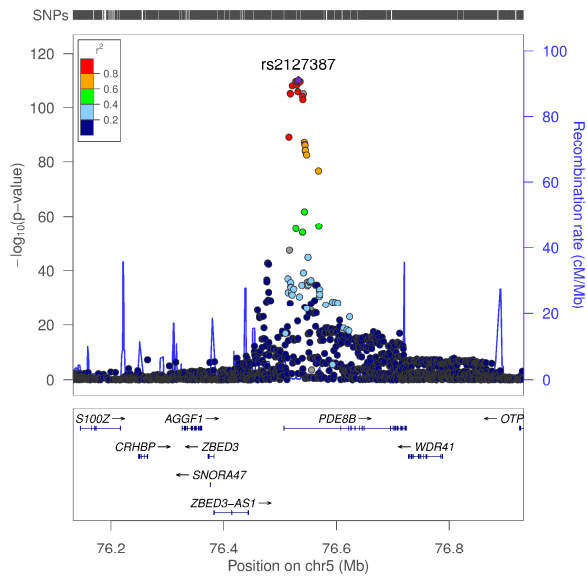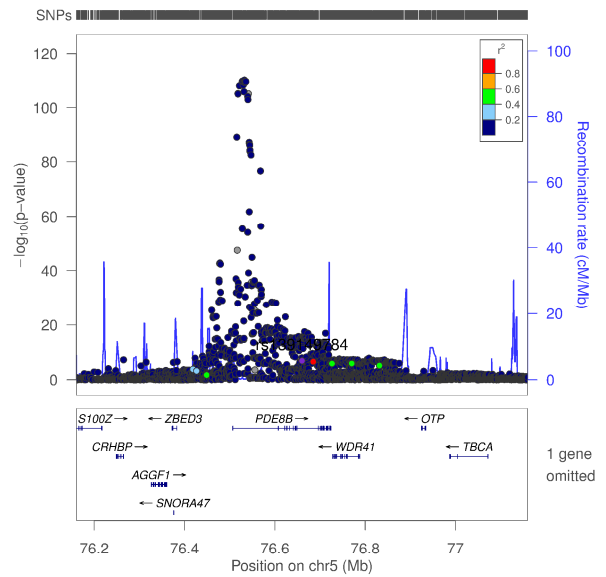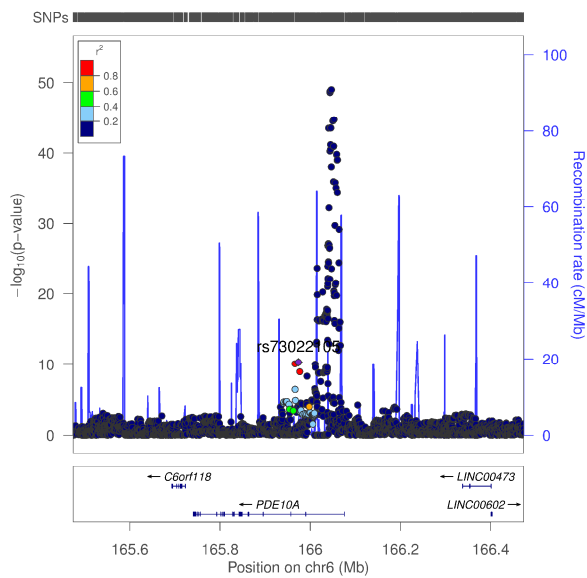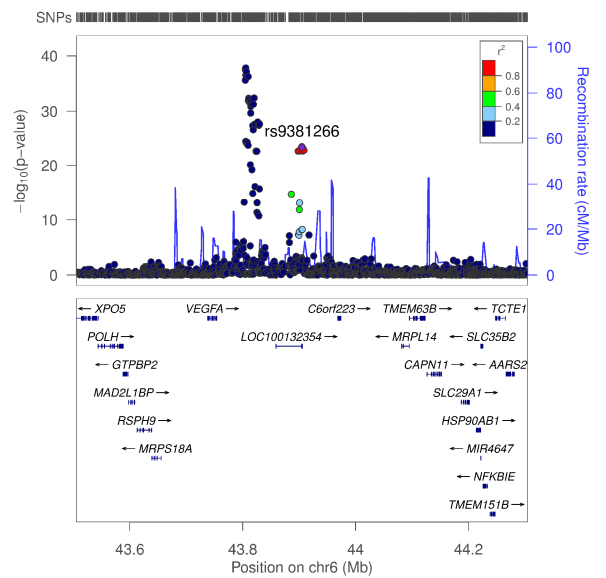

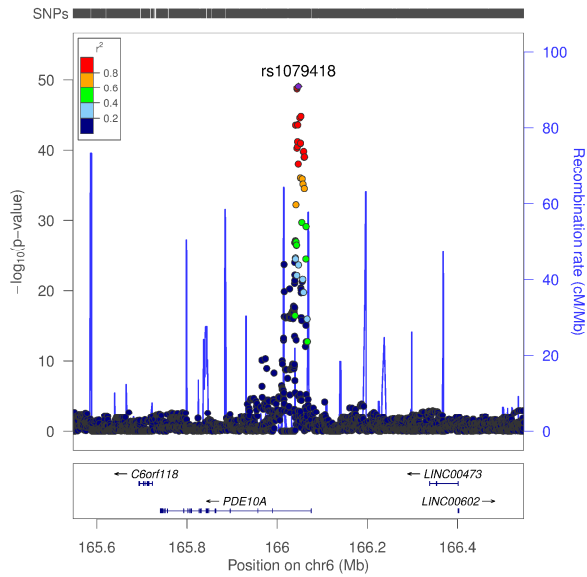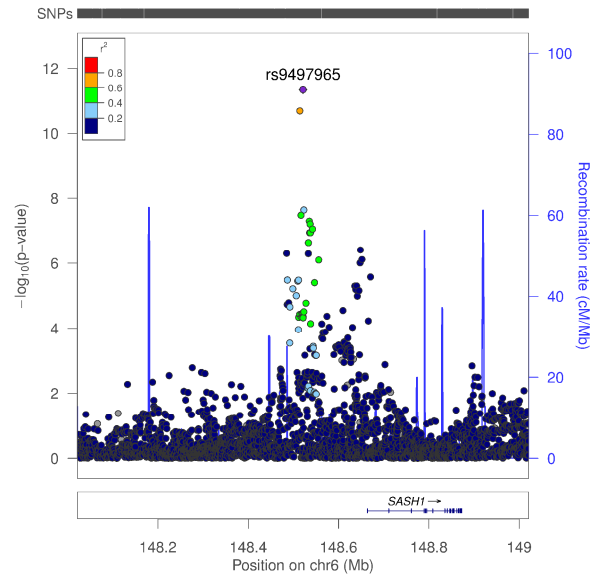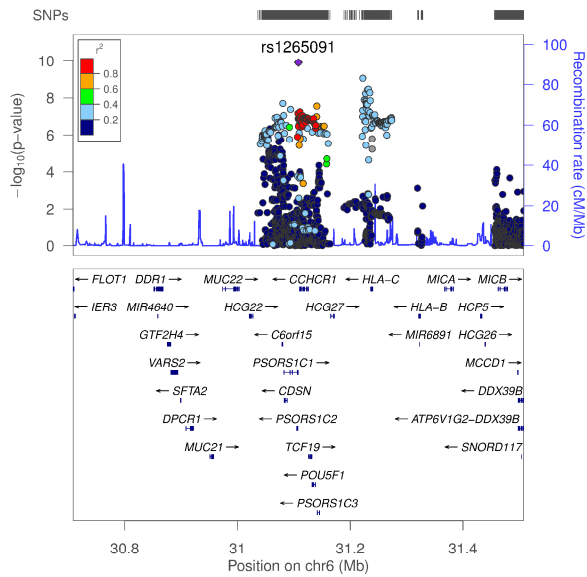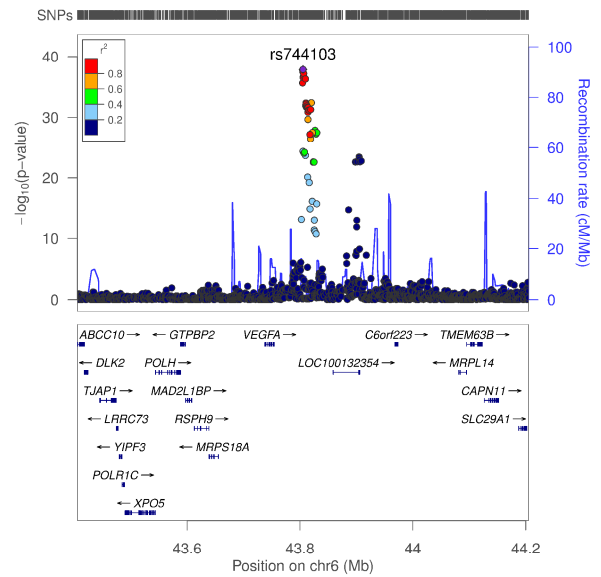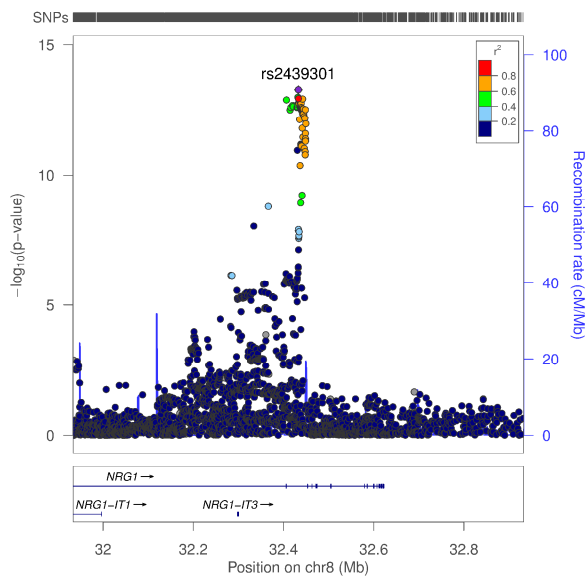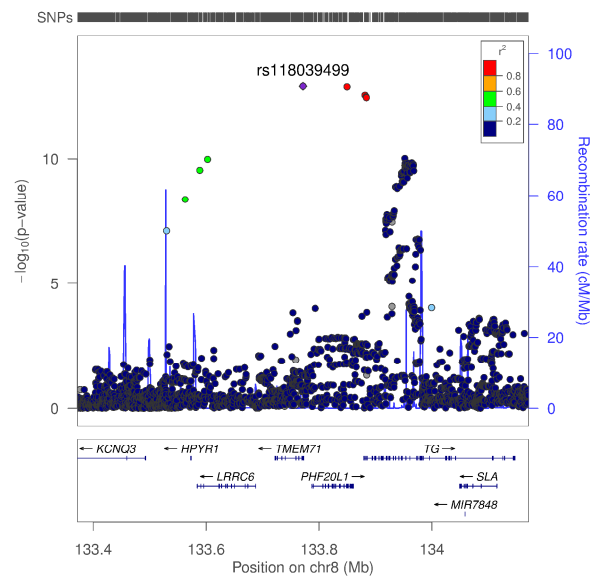

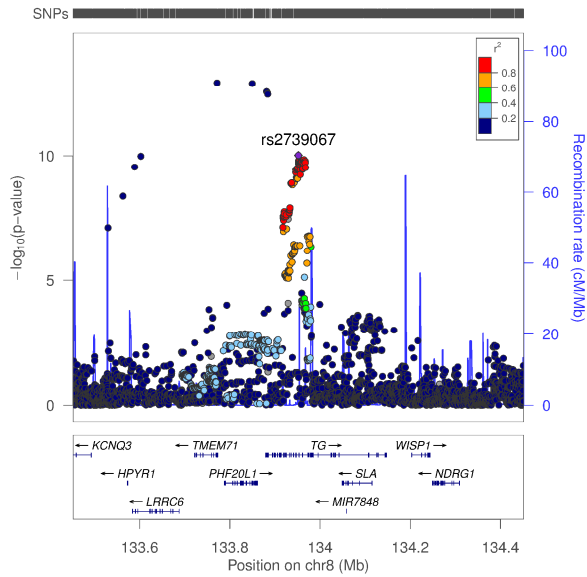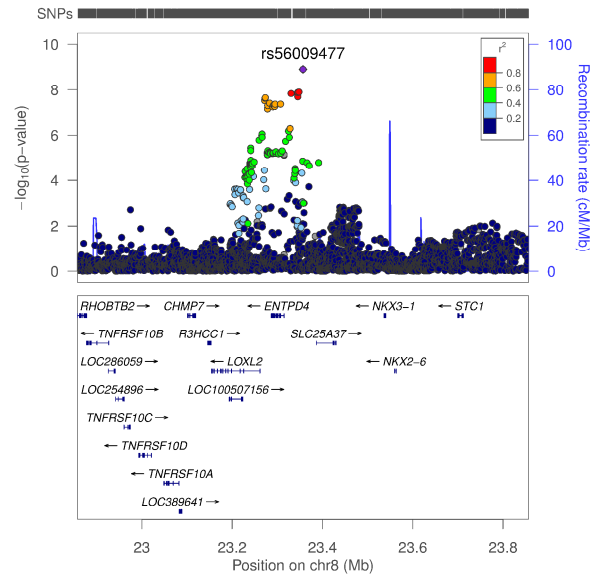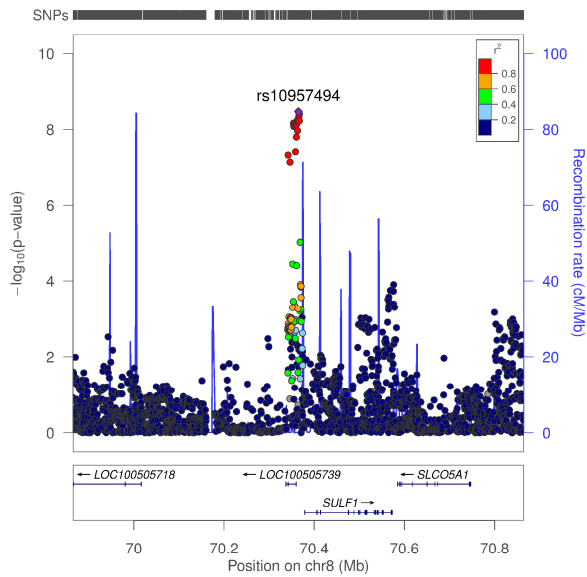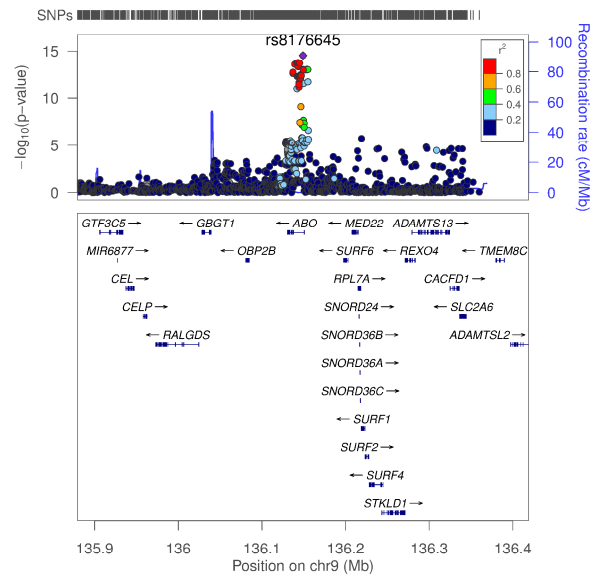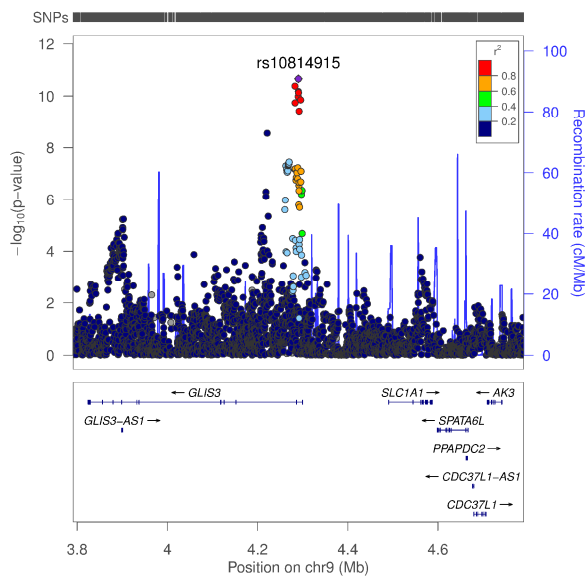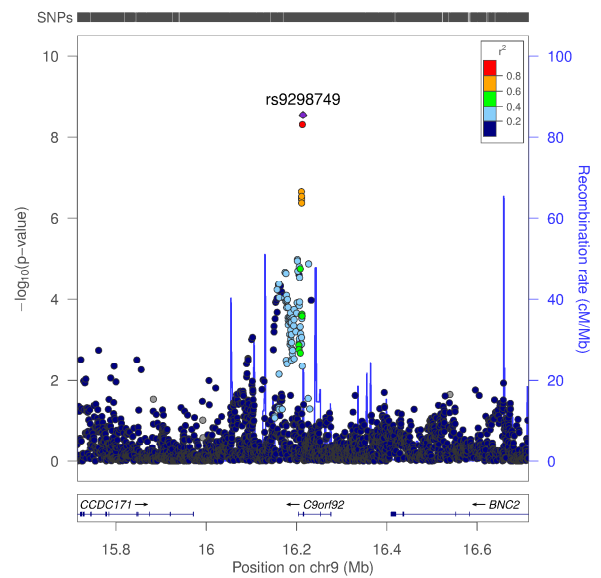

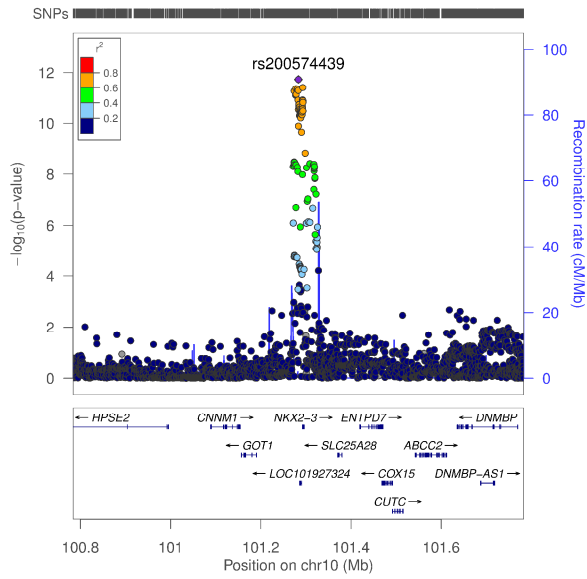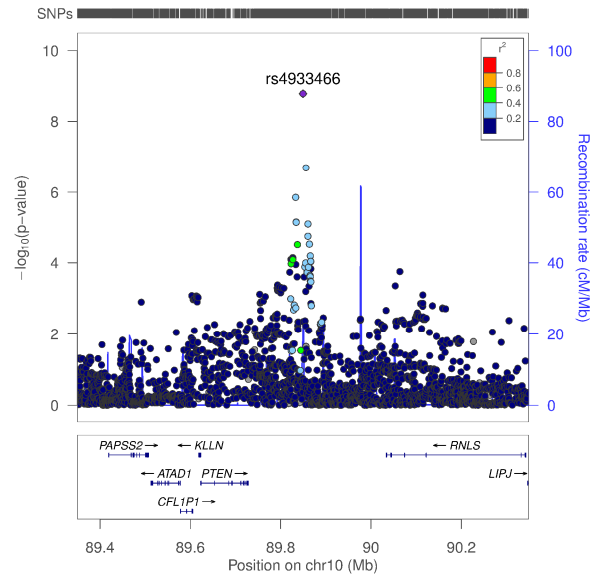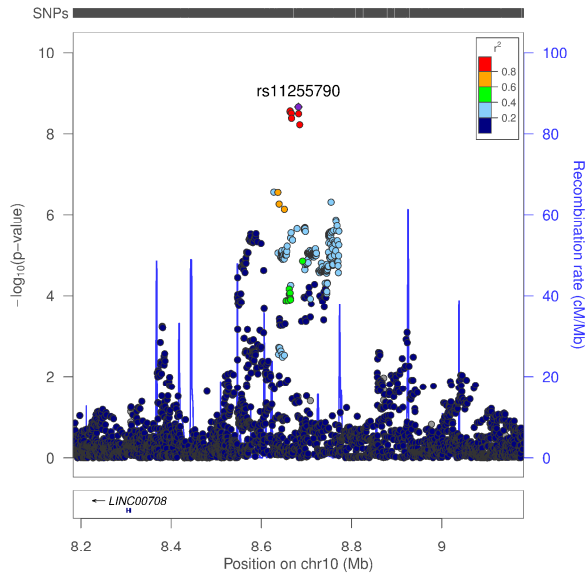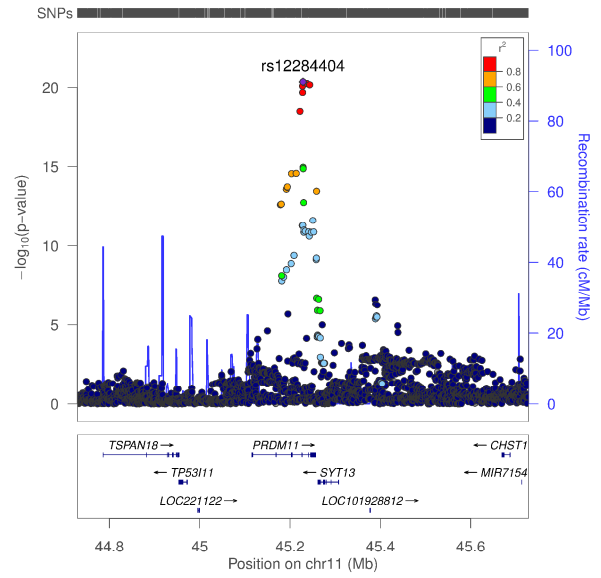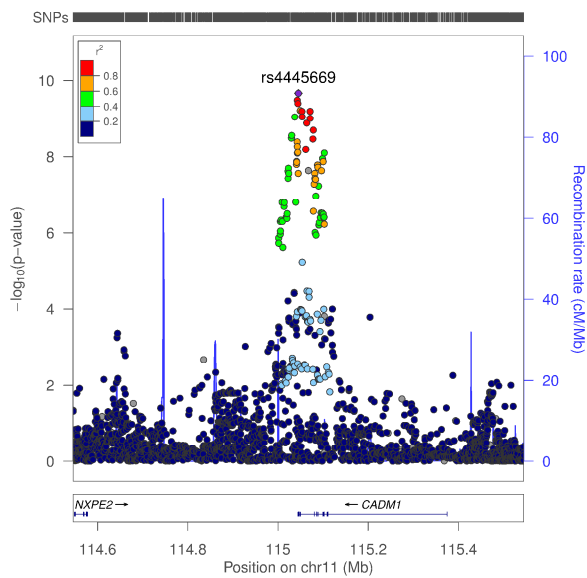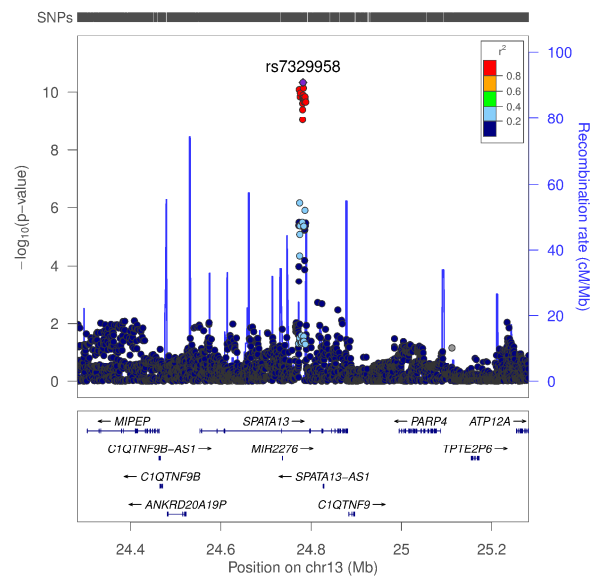

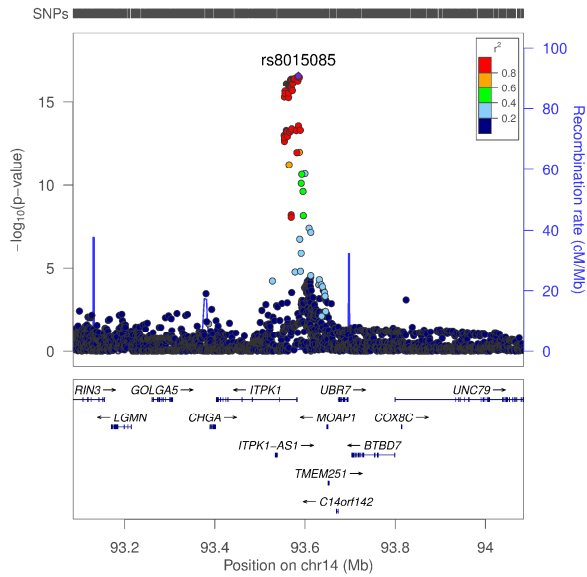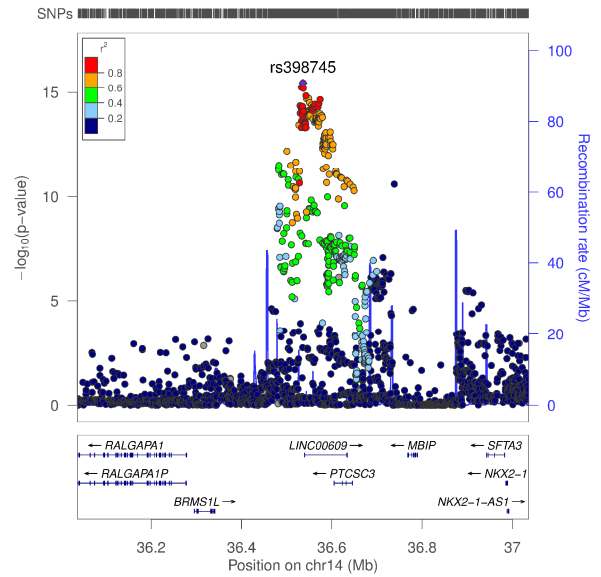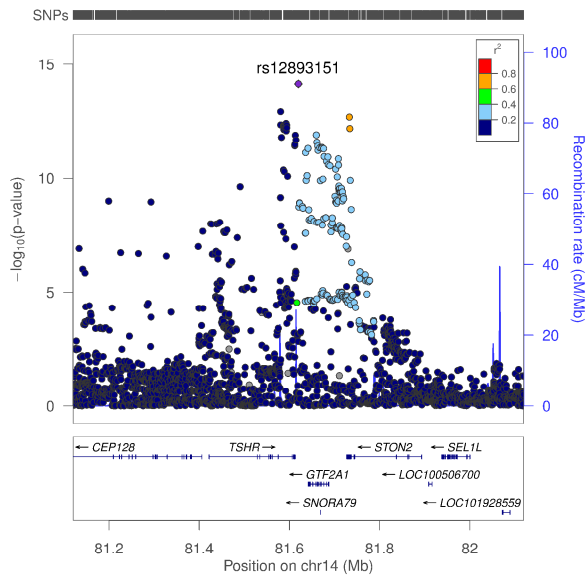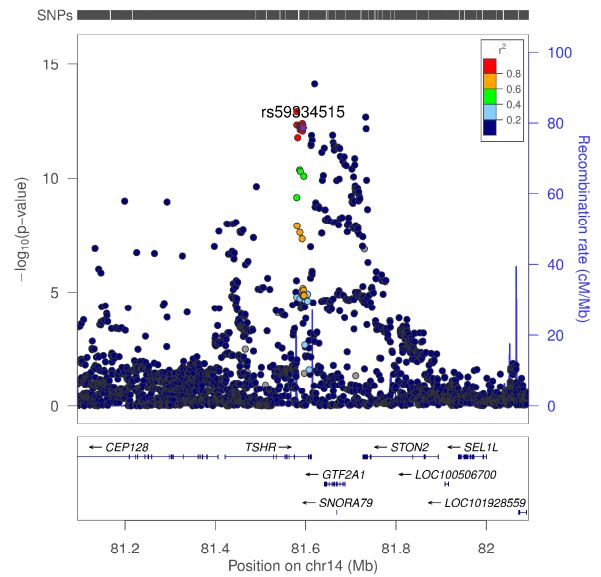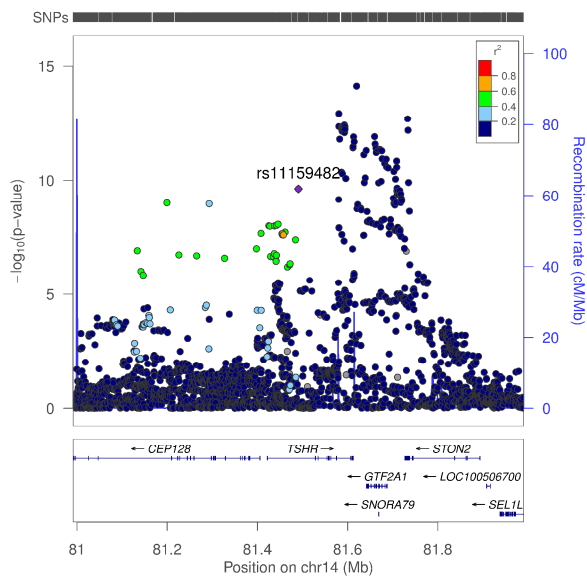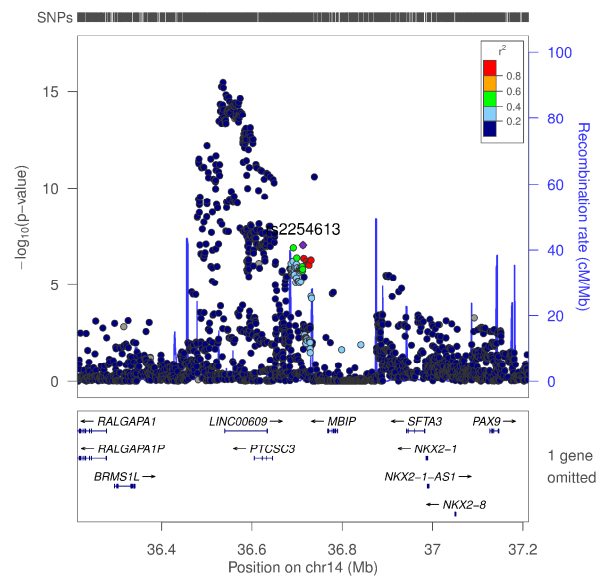

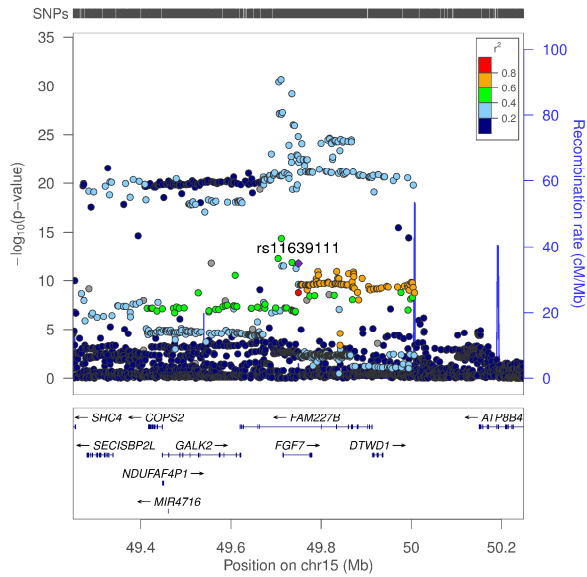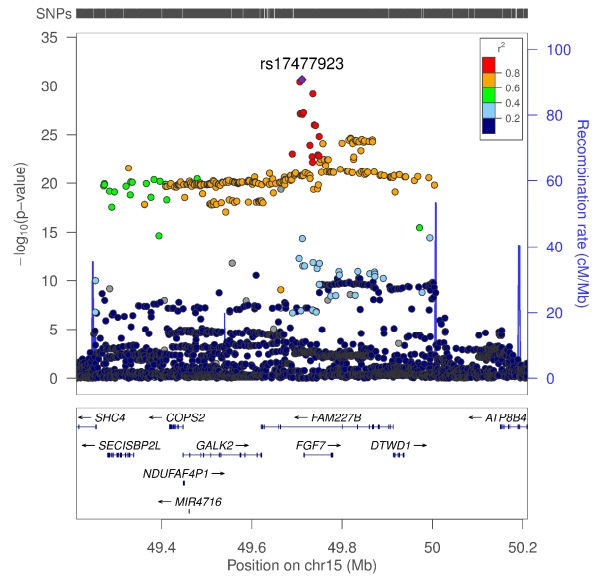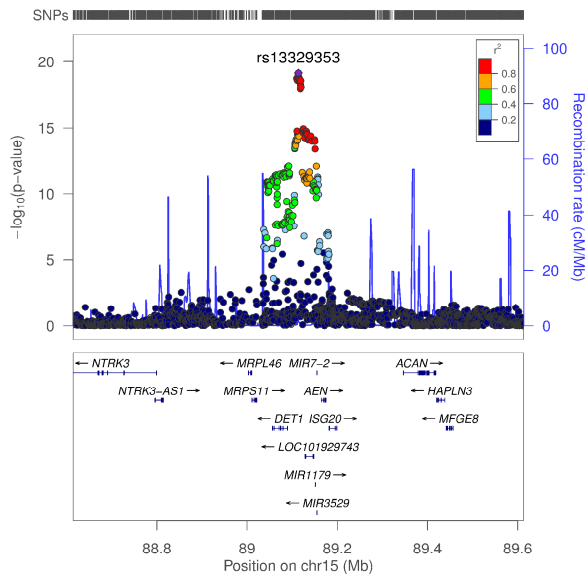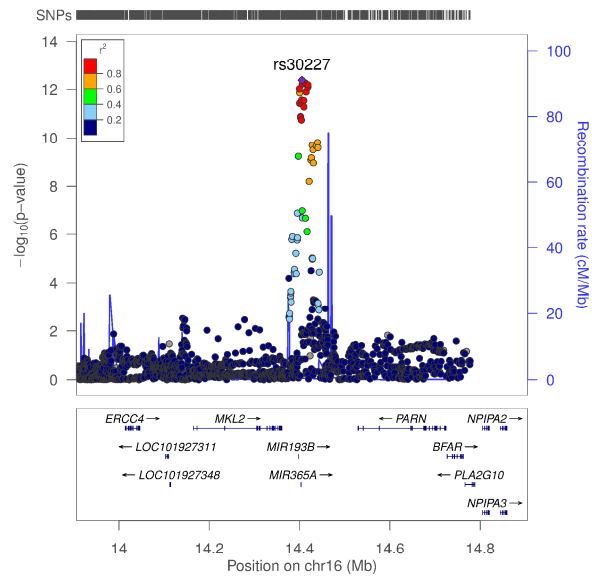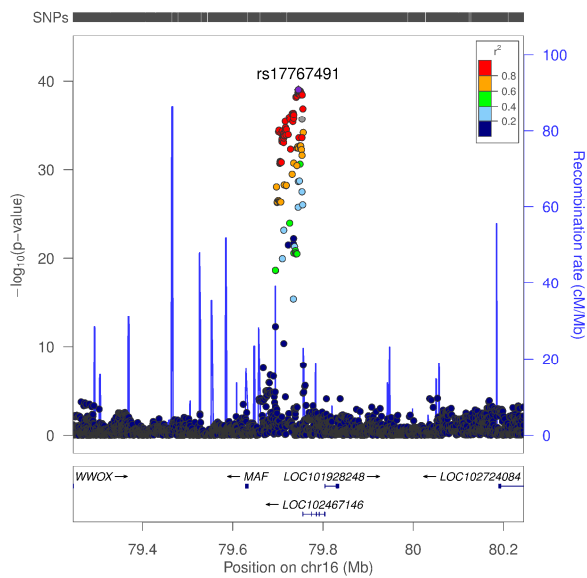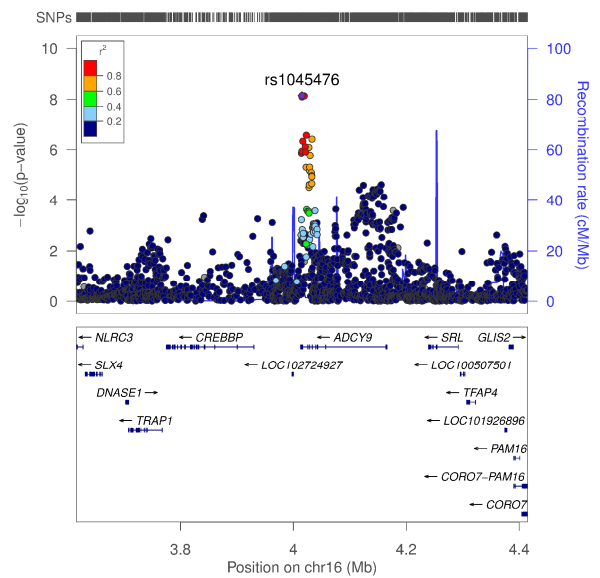

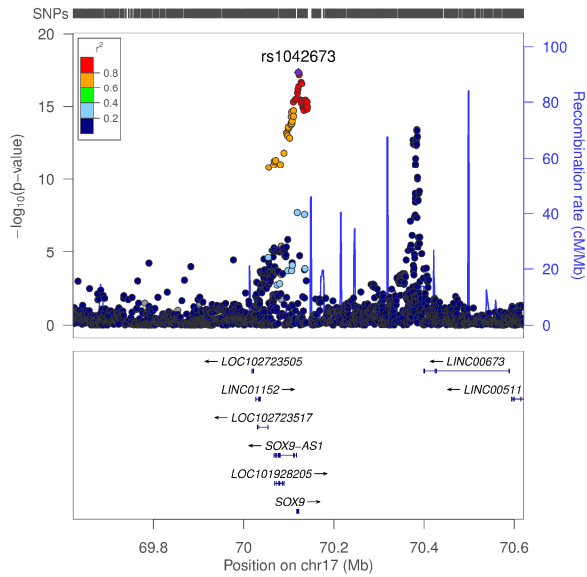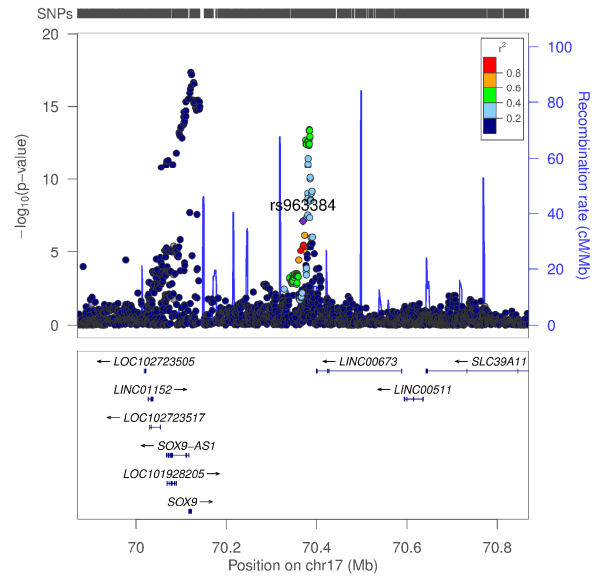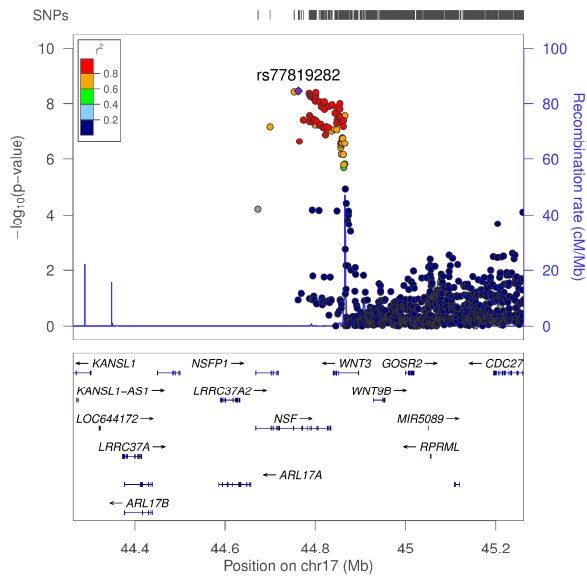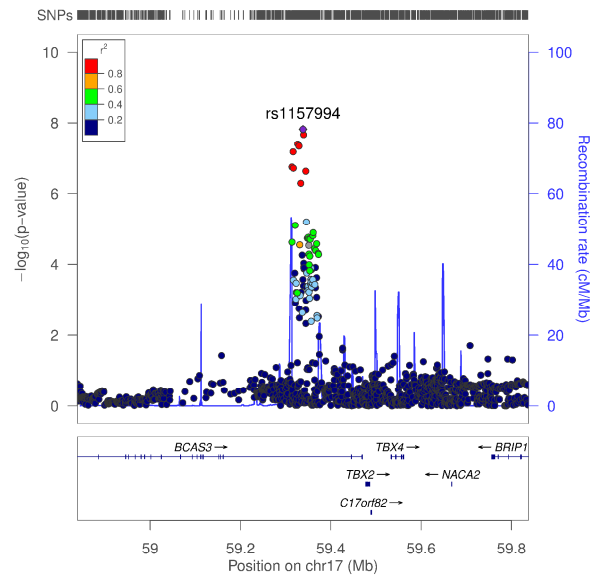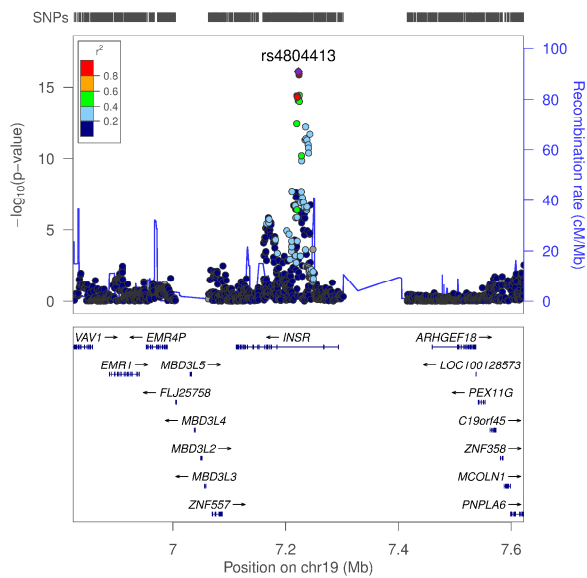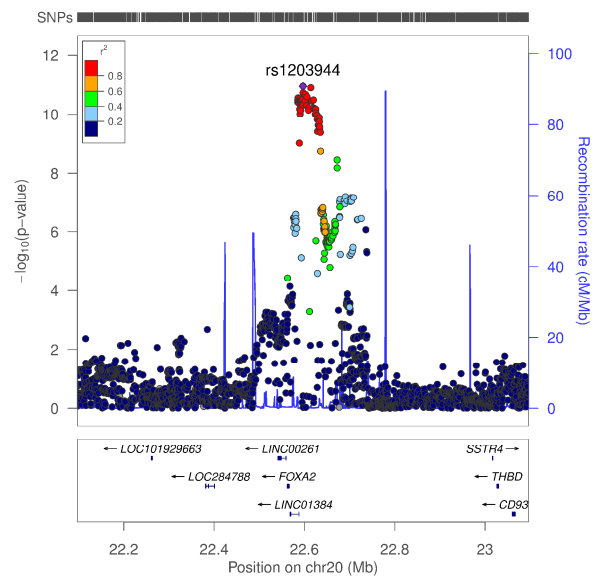



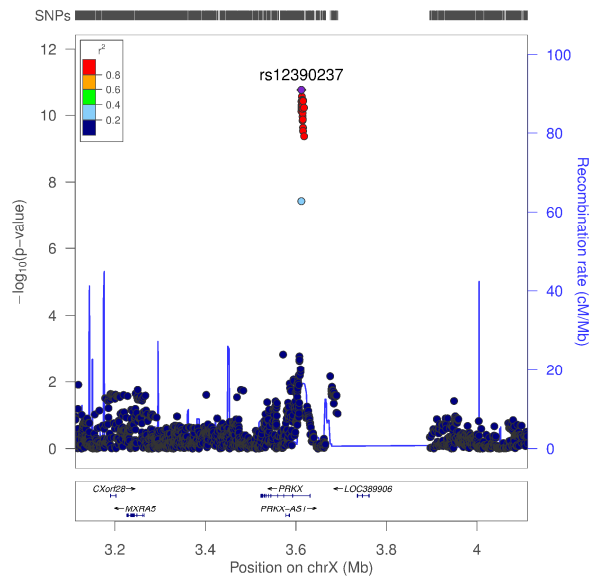

Regional association plots are shown for all genome-wide significant independent SNPs after the final stage meta-analyses. Correlation with the index SNP is estimated based on the 1000 Genomes reference samples. Plots were generated using the stand-alone version of LocusZoom<sup>5</sup>. Genetic positions refer to GRCh37/hg19 coordinates.

**Supplementary Figure 3: Regional association plots for FT4**



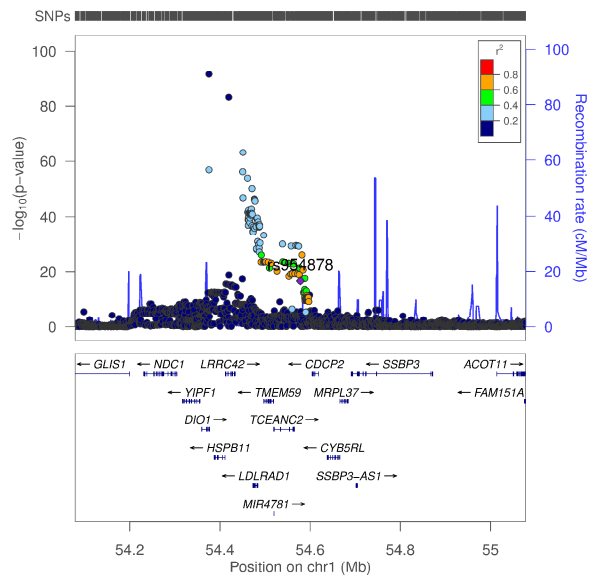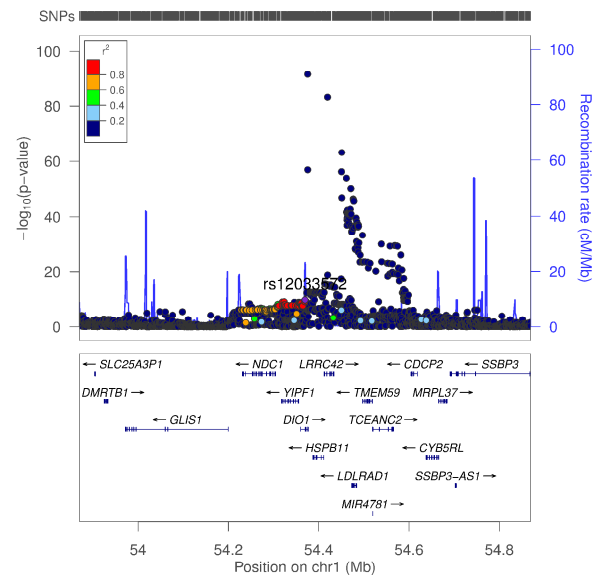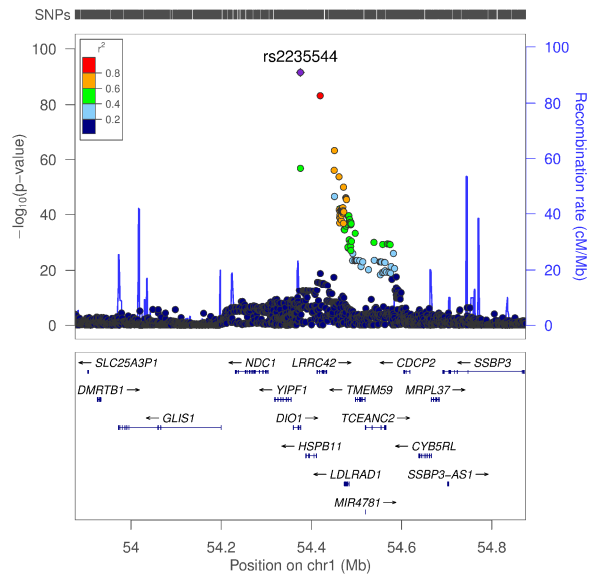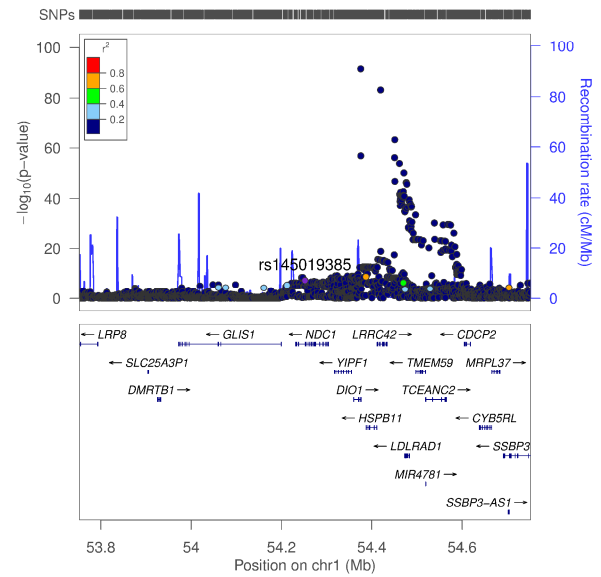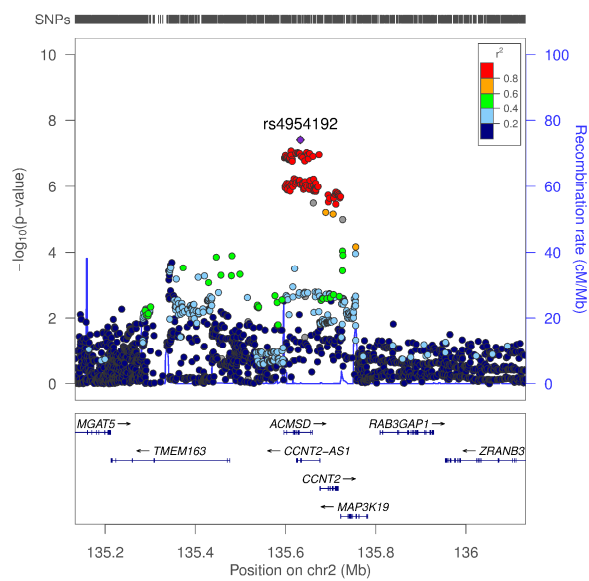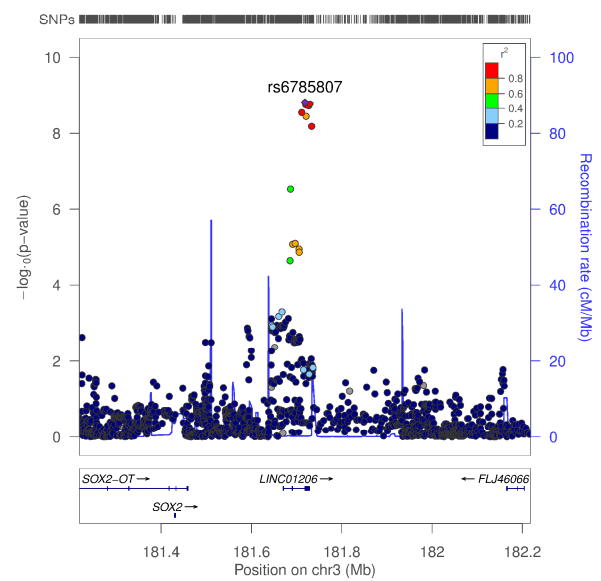

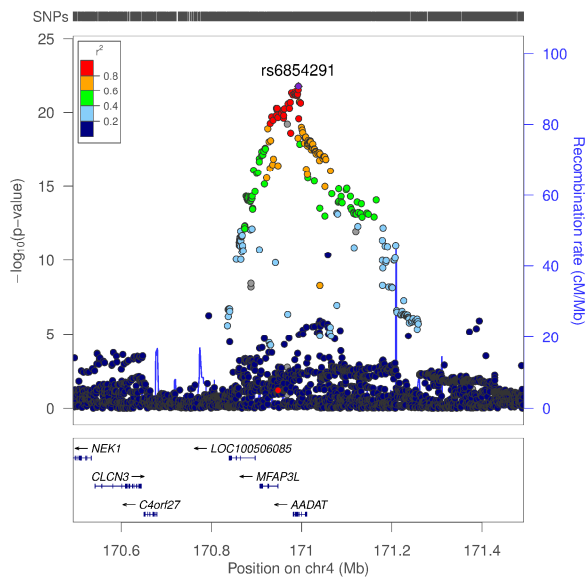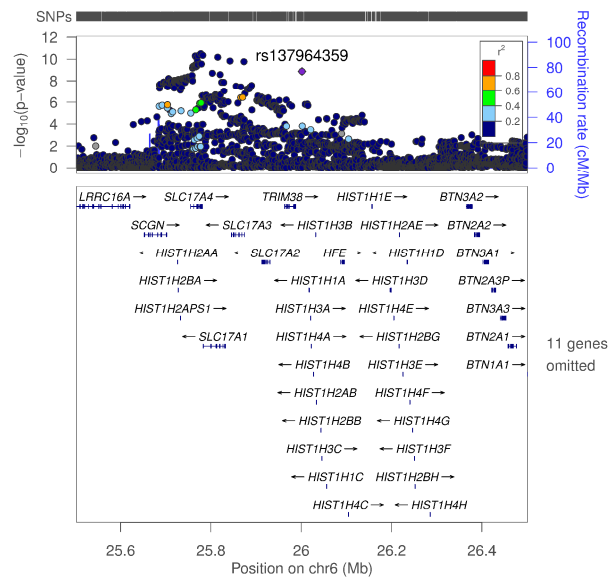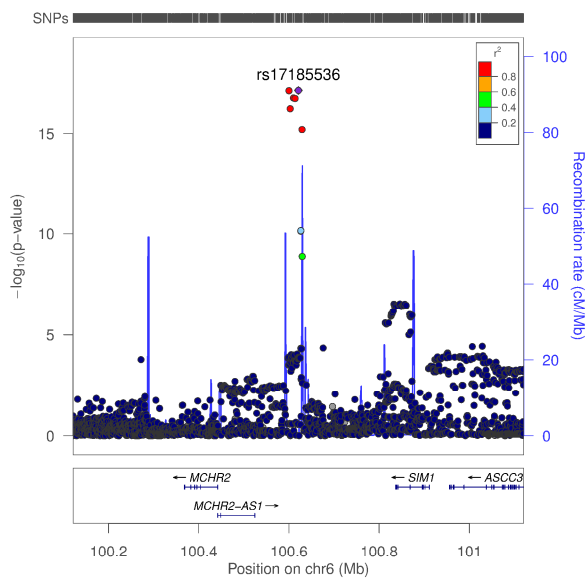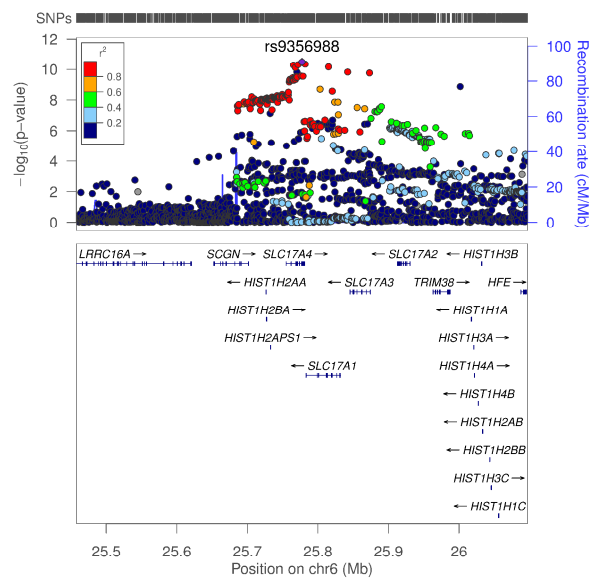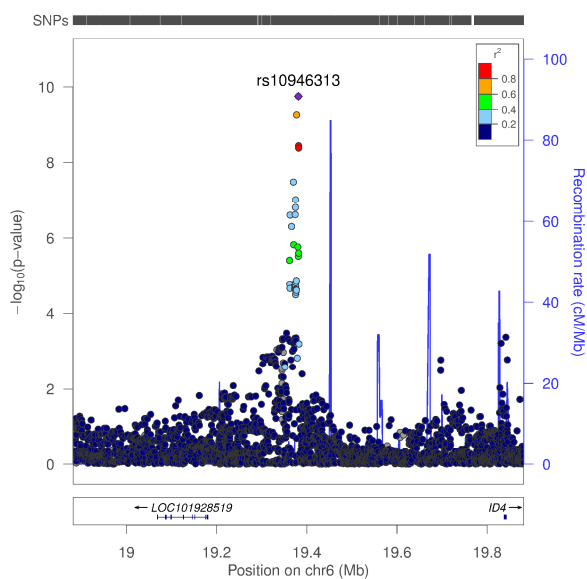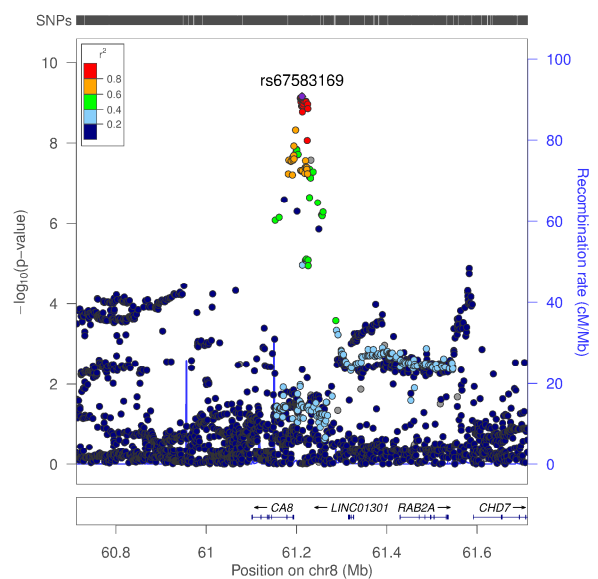

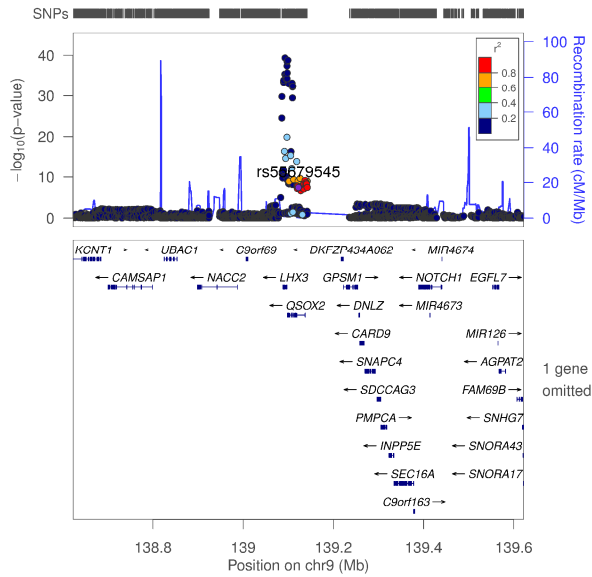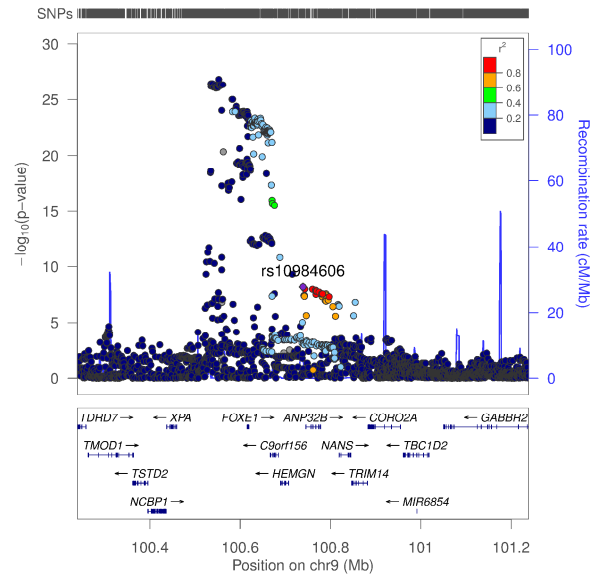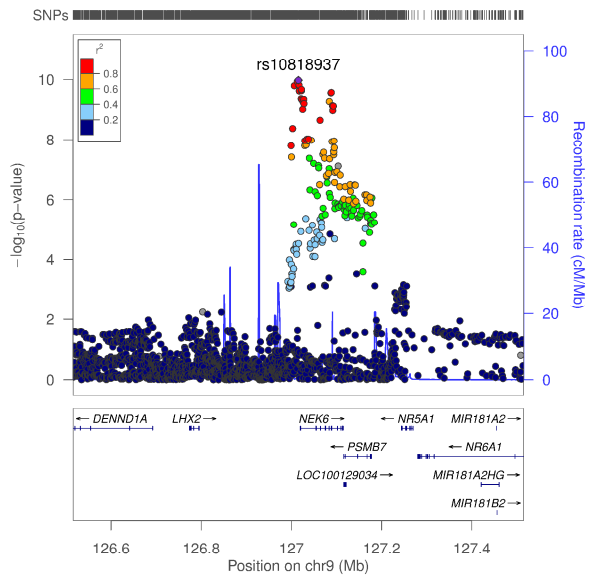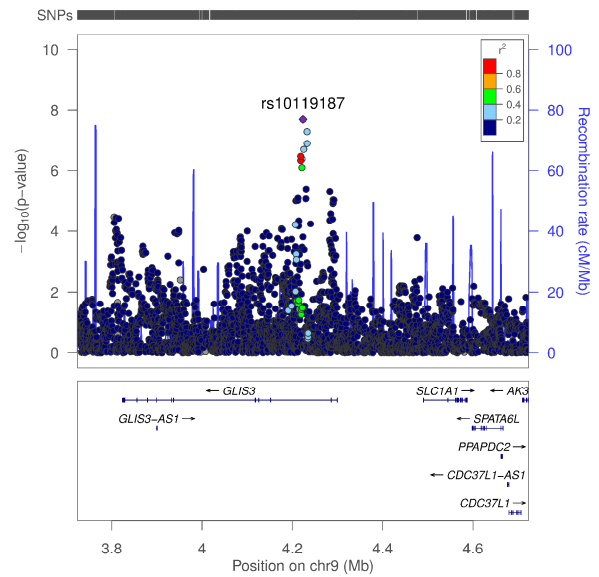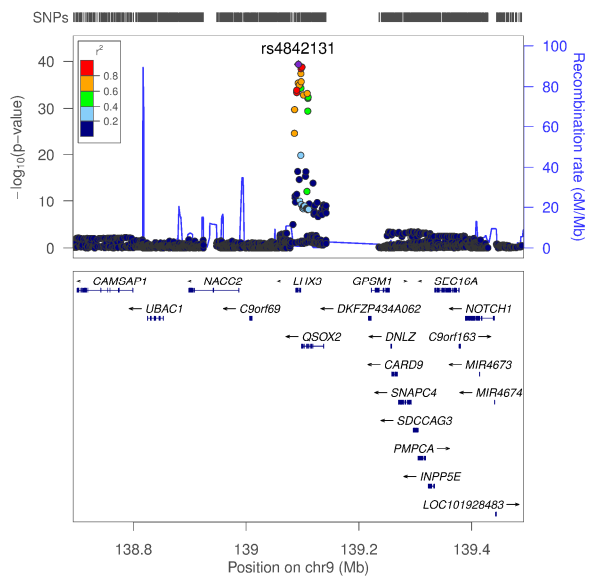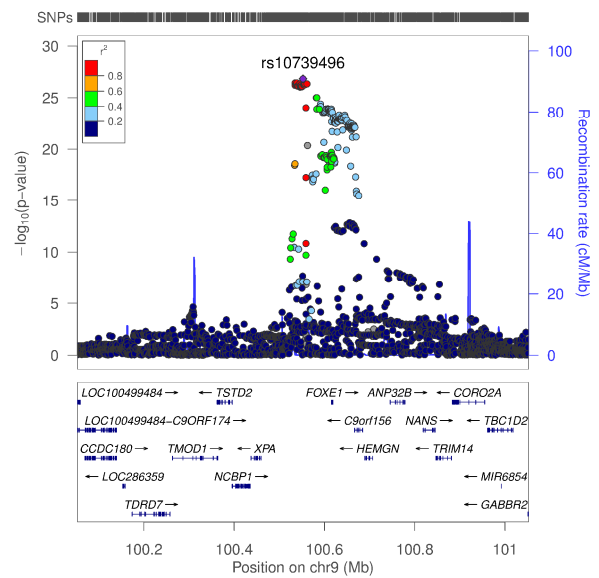

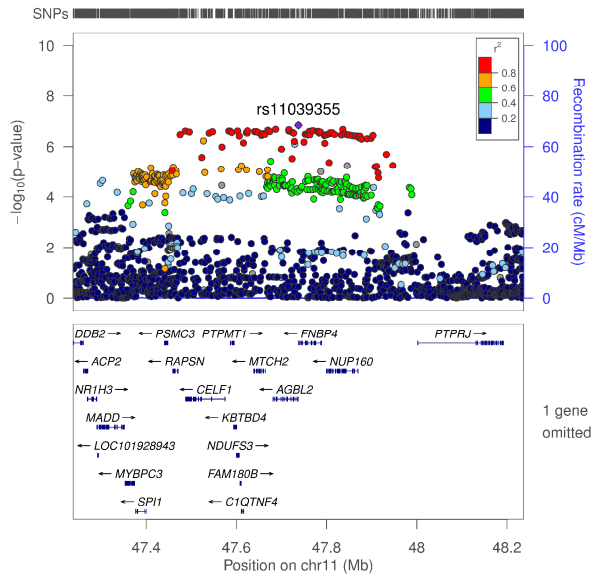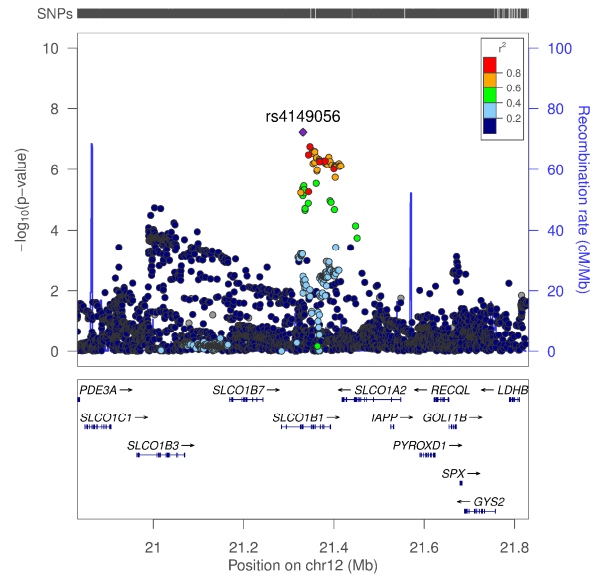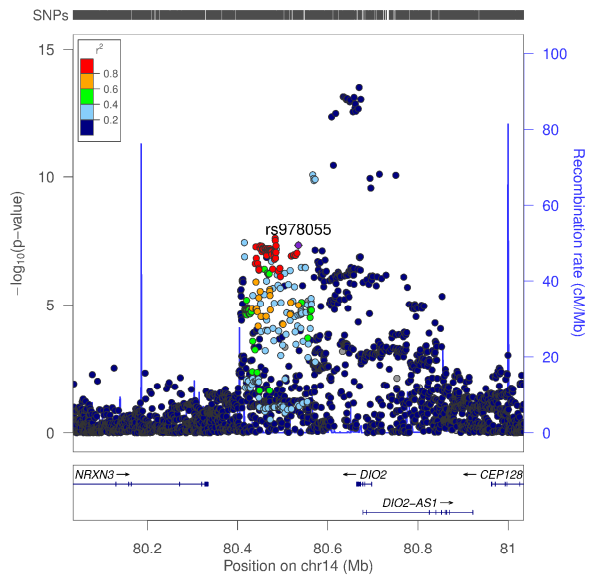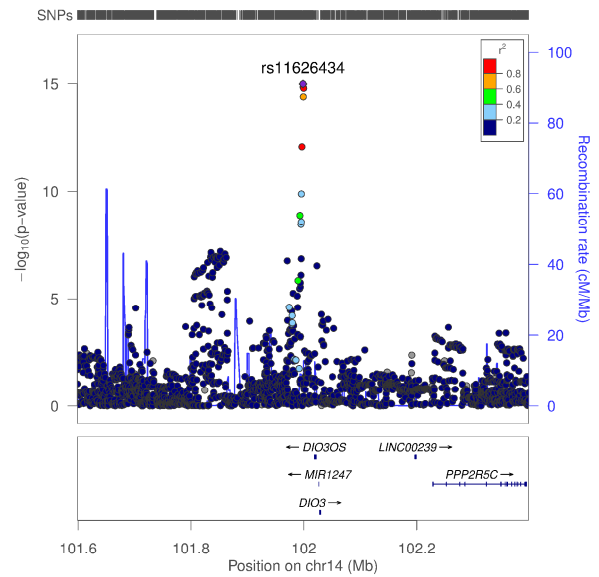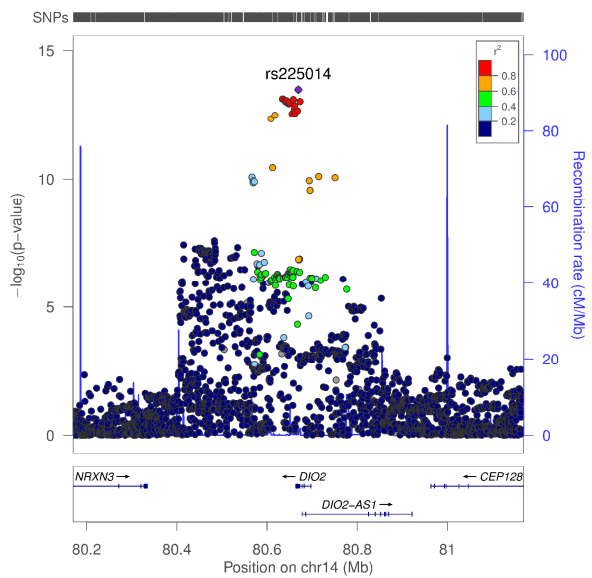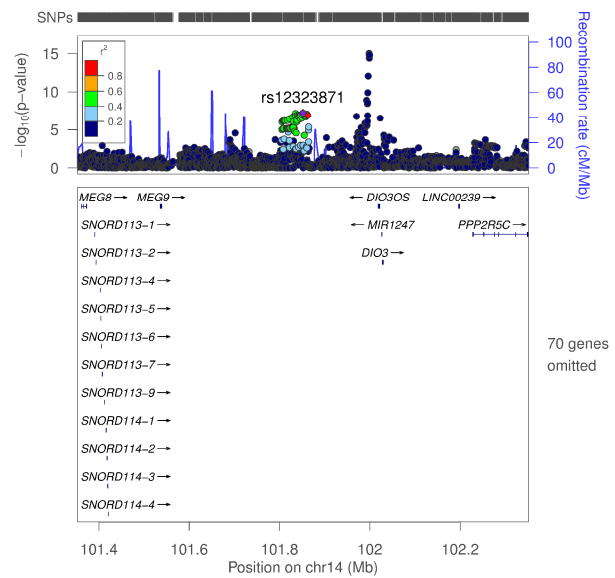

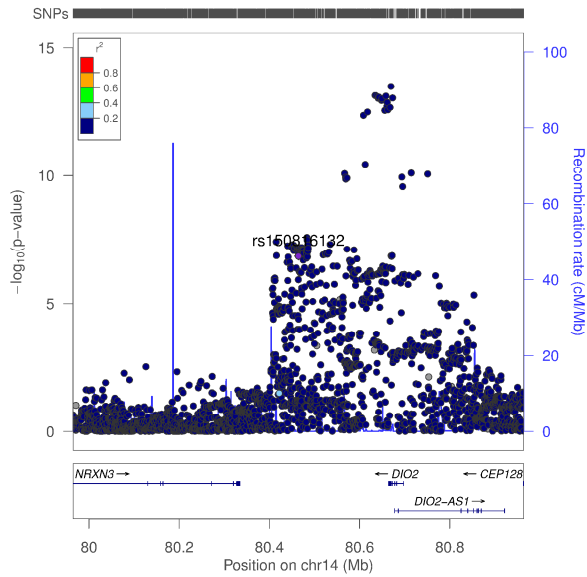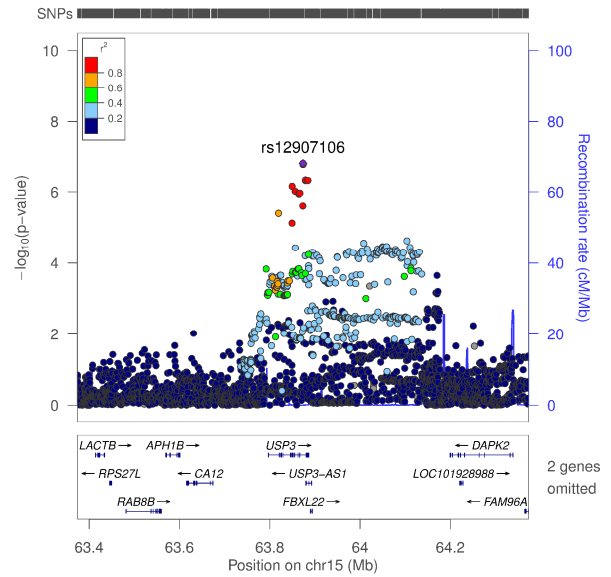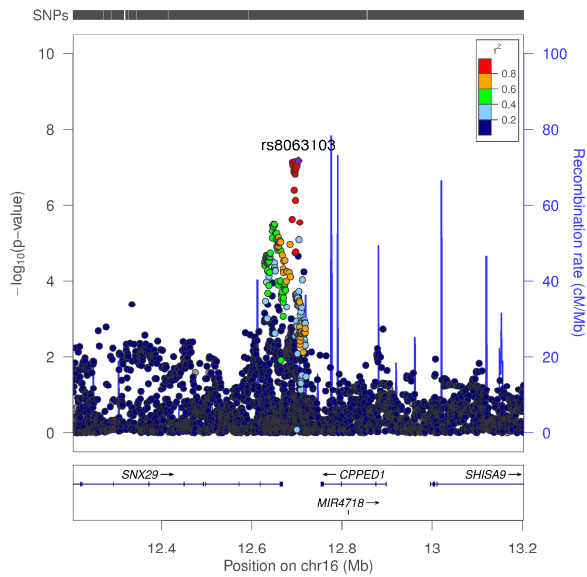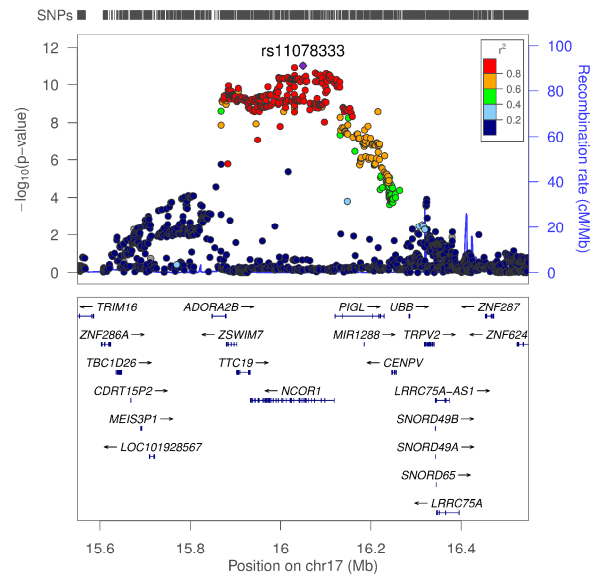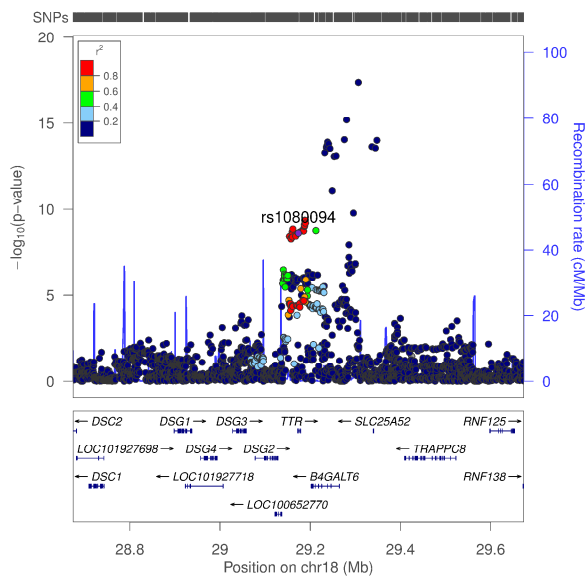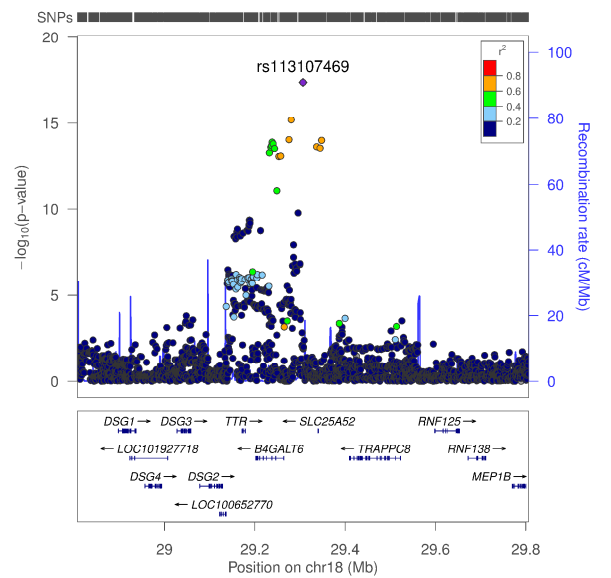

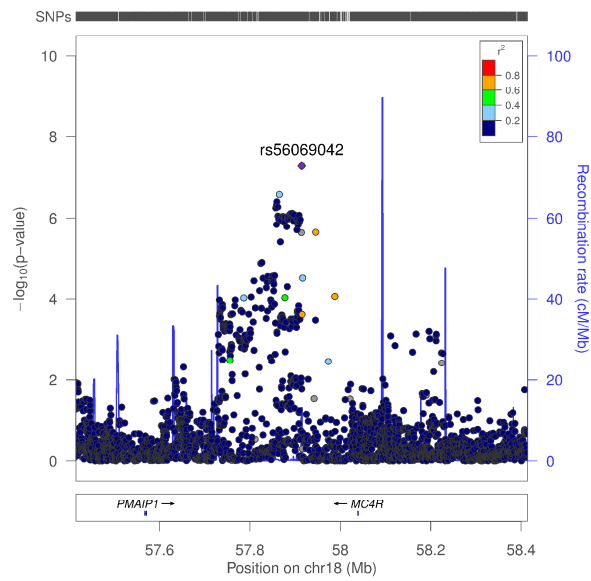

Regional association plots are shown for all genome-wide significant independent SNPs after the final stage meta-analyses. Correlation with the index SNP is estimated based on the 1000 Genomes reference samples. Plots were generated using the stand-alone version of LocusZoom<sup>5</sup>. Genetic positions refer to GRCh37/hg19 coordinates.

#### Supplementary Figure 4: Forest plots for TSH

ARIC men (n=3639)  
 ARIC women (n=3719)  
 Busselton men (n=1873)  
 CHRIS (n=4051)  
 CHS men (n=726)  
 CHS women (n=1012)  
 FHS (n=2240)  
 GARP (n=290)  
 GCKD (n=3386)  
 GOYA cases (n=198)  
 GOYA controls (n=269)  
 HBCS men (n=223)  
 HBCS women (n=189)  
 InCHIANTI men (n=483)  
 InCHIANTI women (n=624)  
 INGI Val (n=1541)  
 KORAF4 men (n=1176)  
 KORAF4 women (n=1037)  
 LBC1921 men (n=152)  
 LBC1921 women (n=191)  
 LBC1936 men (n=403)  
 LBC1936 women (n=328)  
 LifeLines men (n=1672)  
 LifeLines women (n=2384)  
 LLS 02112015 (n=2132)  
 MICROS (n=1031)  
 NBS men (n=842)  
 NBS women (n=843)  
 PROSPER men (n=2172)  
 PROSPER women (n=2043)  
 RSI men (n=1286)  
 RSI women (n=1633)  
 RSII men (n=848)  
 RSII women (n=883)  
 RSIII men (n=1208)  
 RSIII women (n=1386)  
 SardiNIA (n=5552)  
 SHIP (n=369)  
 SHIP (n=421)  
 SHIP men (n=1741)  
 SHIP women (n=1592)  
 TwinsUK (n=3270)  
**meta analysis:  $I^2=29.4$  (n=61058)**

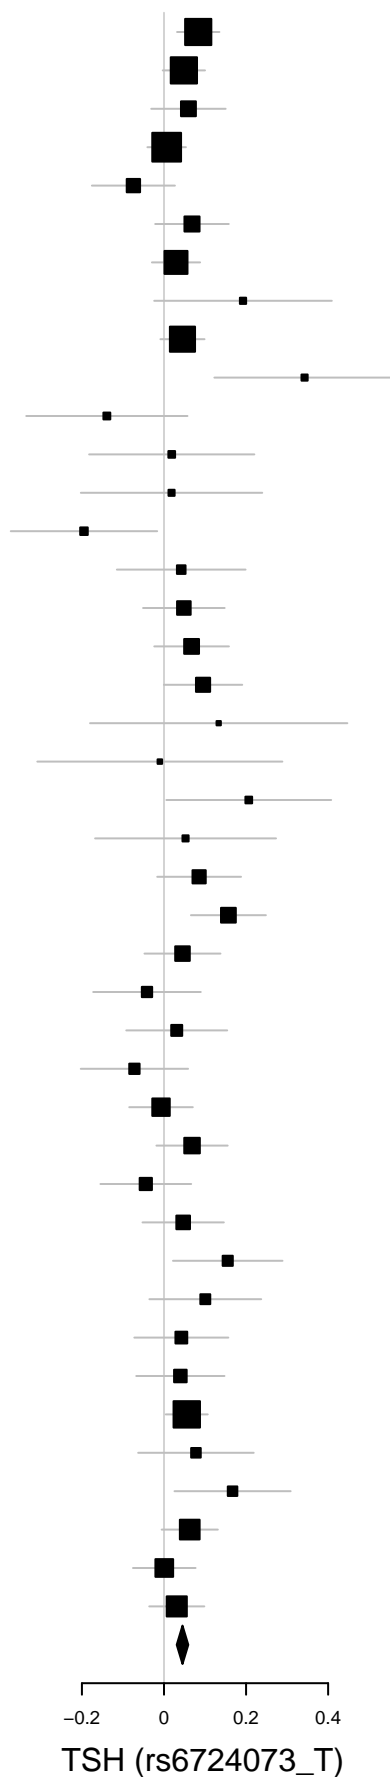

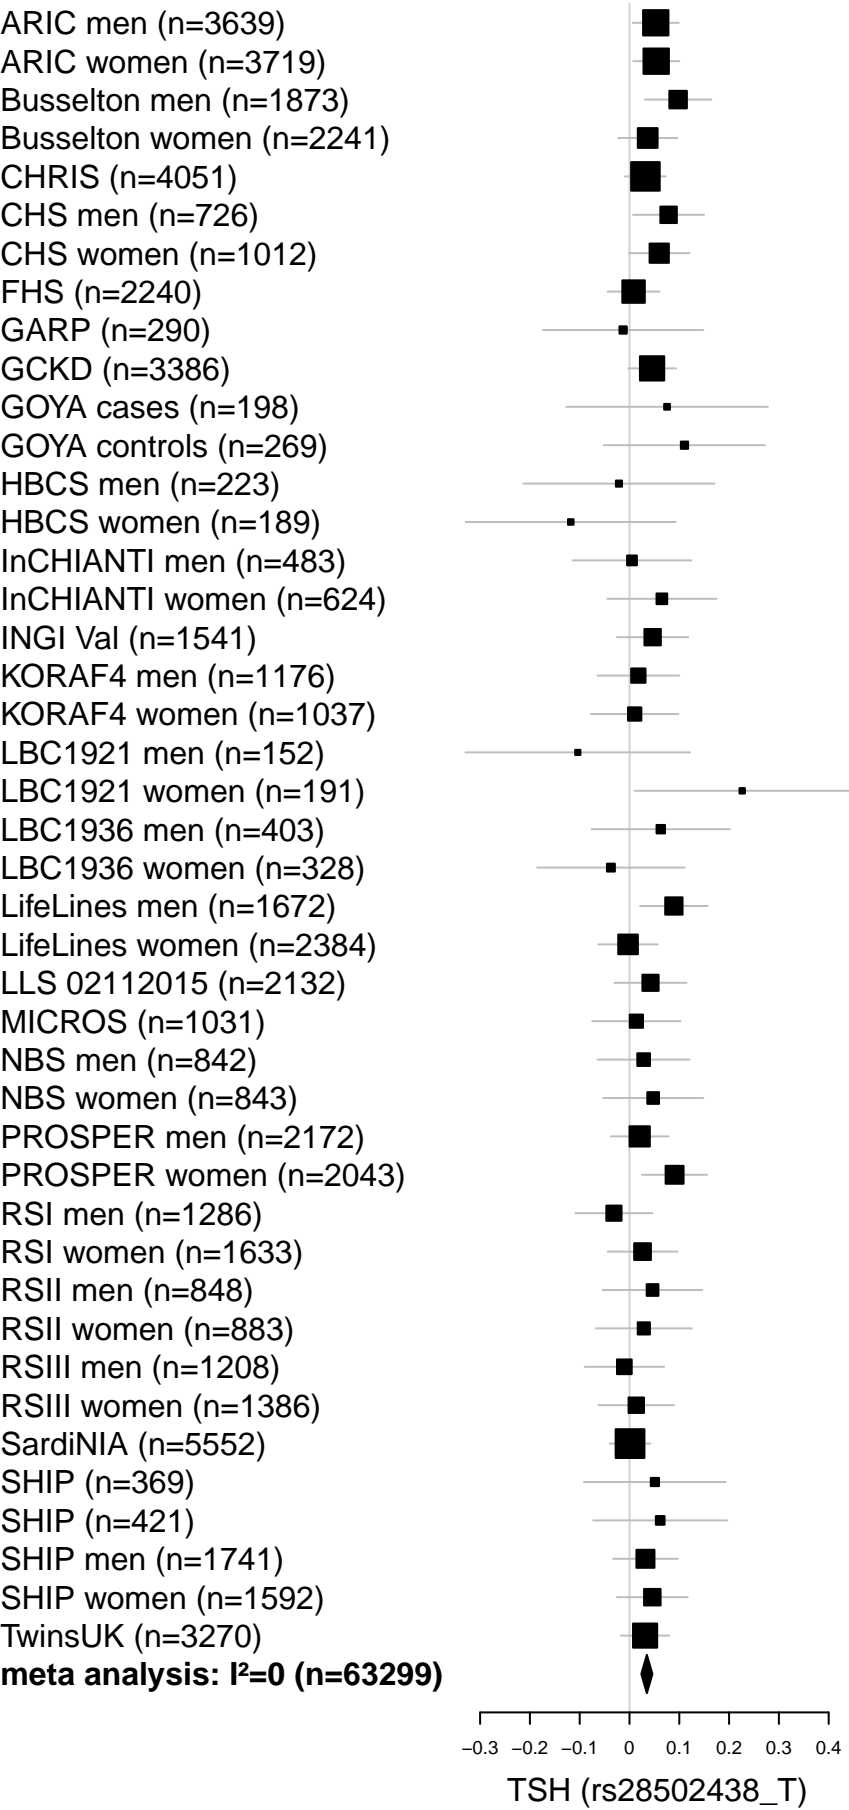



ARIC men (n=3639)  
 ARIC women (n=3719)  
 Busselton men (n=1873)  
 Busselton women (n=2241)  
 CHRIS (n=4051)  
 CHS men (n=726)  
 CHS women (n=1012)  
 FHS (n=2240)  
 GARP (n=290)  
 GCKD (n=3386)  
 GOYA cases (n=198)  
 GOYA controls (n=269)  
 HBCS men (n=223)  
 HBCS women (n=189)  
 InCHIANTI men (n=483)  
 InCHIANTI women (n=624)  
 INGI Val (n=1541)  
 KORAF4 men (n=1176)  
 KORAF4 women (n=1037)  
 LBC1921 men (n=152)  
 LBC1921 women (n=191)  
 LBC1936 men (n=403)  
 LBC1936 women (n=328)  
 LifeLines men (n=1672)  
 LifeLines women (n=2384)  
 LLS 02112015 (n=2132)  
 MICROS (n=1031)  
 NBS men (n=842)  
 NBS women (n=843)  
 PROSPER men (n=2172)  
 PROSPER women (n=2043)  
 RSI men (n=1286)  
 RSI women (n=1633)  
 RSII men (n=848)  
 RSII women (n=883)  
 RSIII men (n=1208)  
 RSIII women (n=1386)  
 SardiNIA (n=5552)  
 SHIP (n=369)  
 SHIP (n=421)  
 SHIP men (n=1741)  
 SHIP women (n=1592)  
 TwinsUK (n=3270)  
**meta analysis: I<sup>2</sup>=2.1 (n=63299)**

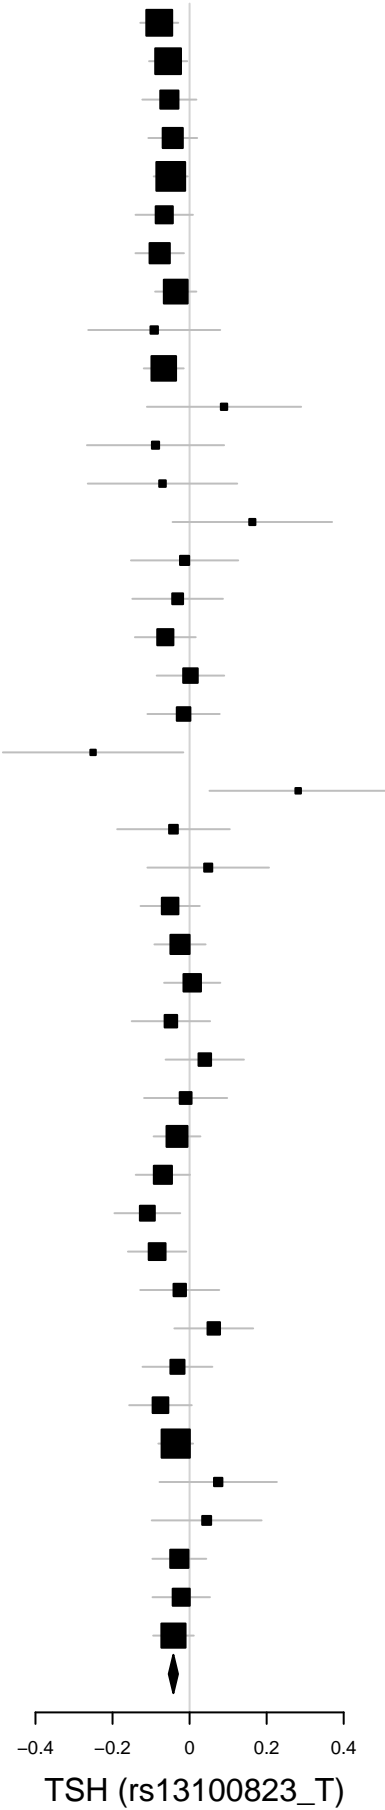

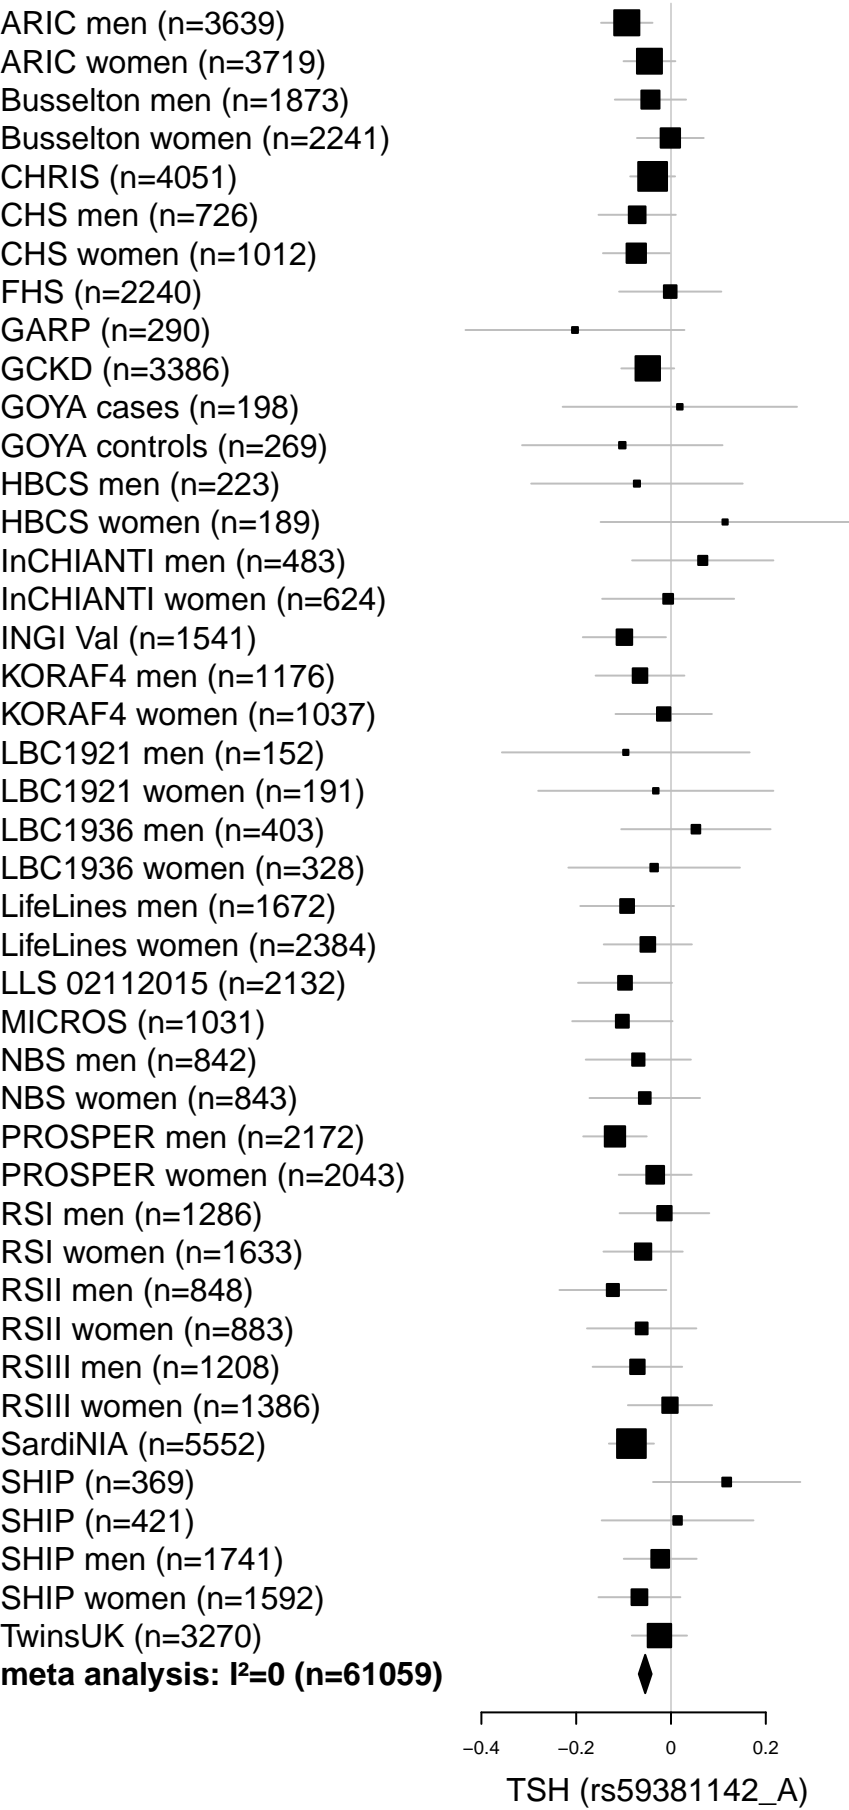

ARIC men (n=3639)  
 ARIC women (n=3719)  
 Busselton men (n=1873)  
 Busselton women (n=2241)  
 CHRIS (n=4051)  
 CHS men (n=726)  
 CHS women (n=1012)  
 FHS (n=2240)  
 GARP (n=290)  
 GCKD (n=3386)  
 GOYA cases (n=198)  
 GOYA controls (n=269)  
 HBCS men (n=223)  
 HBCS women (n=189)  
 Health2006 (n=2890)  
 INGI Val (n=1541)  
 Inter99 (n=5978)  
 KORAF4 men (n=1176)  
 KORAF4 women (n=1037)  
 LBC1921 men (n=152)  
 LBC1921 women (n=191)  
 LBC1936 men (n=403)  
 LBC1936 women (n=328)  
 LifeLines men (n=1672)  
 LifeLines women (n=2384)  
 LLS 02112015 (n=2132)  
 MICROS (n=1031)  
 NBS men (n=842)  
 NBS women (n=843)  
 PROSPER men (n=2172)  
 PROSPER women (n=2043)  
 RSI men (n=1286)  
 RSI women (n=1633)  
 RSII men (n=848)  
 RSII women (n=883)  
 RSIII men (n=1208)  
 RSIII women (n=1386)  
 SardiNIA (n=5552)  
 SHIP (n=369)  
 SHIP (n=421)  
 SHIP men (n=1741)  
 SHIP women (n=1592)  
 TwinsUK (n=3270)  
**meta analysis:  $I^2=40.4$  (n=64423)**

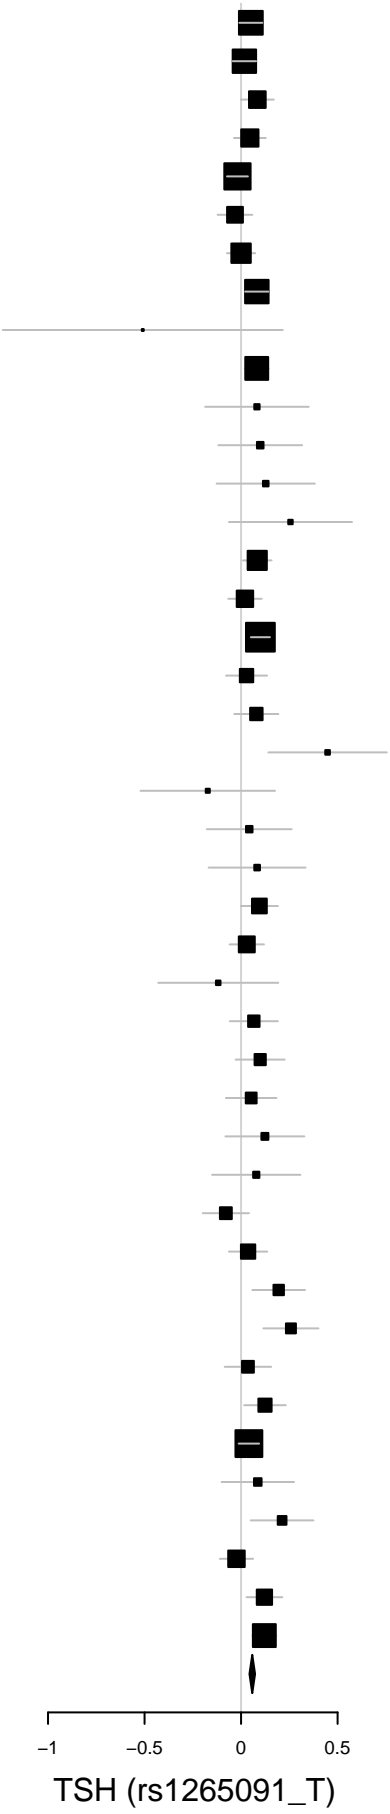

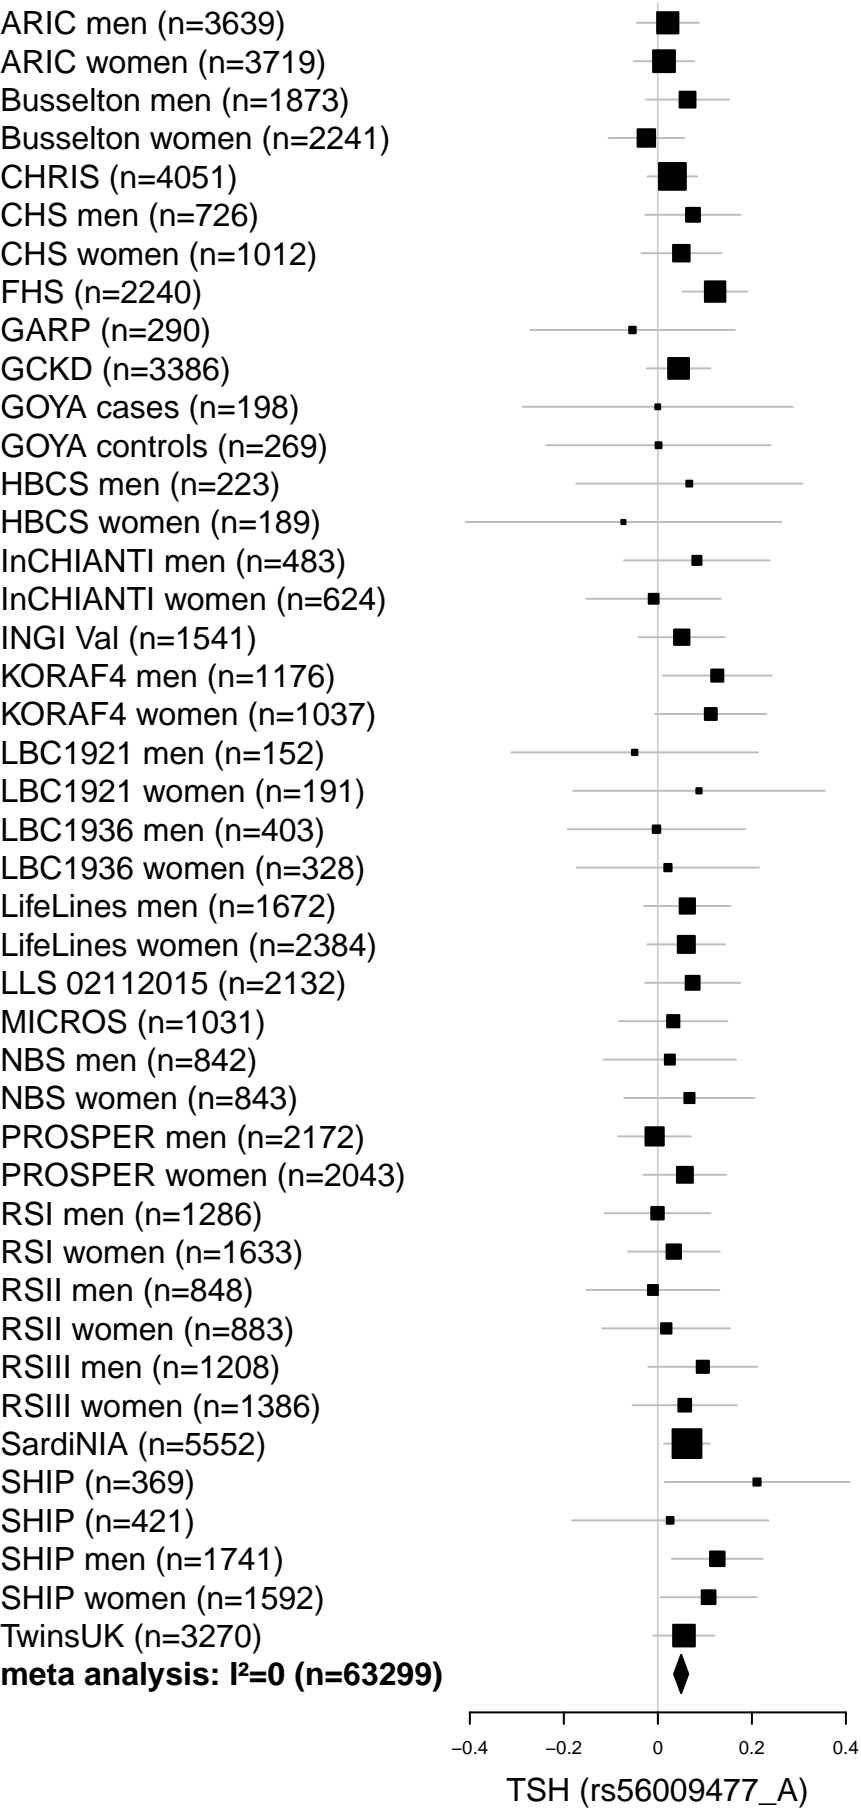

ARIC men (n=3639)  
 ARIC women (n=3719)  
 Busselton men (n=1873)  
 Busselton women (n=2241)  
 CHRIS (n=4051)  
 CHS men (n=726)  
 CHS women (n=1012)  
 FHS (n=2240)  
 GARP (n=290)  
 GCKD (n=3386)  
 GOYA cases (n=198)  
 GOYA controls (n=269)  
 HBCS men (n=223)  
 HBCS women (n=189)  
 InCHIANTI men (n=483)  
 InCHIANTI women (n=624)  
 INGI Val (n=1541)  
 KORAF4 men (n=1176)  
 KORAF4 women (n=1037)  
 LBC1921 men (n=152)  
 LBC1921 women (n=191)  
 LBC1936 men (n=403)  
 LBC1936 women (n=328)  
 LifeLines men (n=1672)  
 LifeLines women (n=2384)  
 LLS 02112015 (n=2132)  
 MICROS (n=1031)  
 NBS men (n=842)  
 NBS women (n=843)  
 PROSPER men (n=2172)  
 PROSPER women (n=2043)  
 RSI men (n=1286)  
 RSI women (n=1633)  
 RSII men (n=848)  
 RSII women (n=883)  
 RSIII men (n=1208)  
 RSIII women (n=1386)  
 SardiNIA (n=5552)  
 SHIP (n=369)  
 SHIP (n=421)  
 SHIP men (n=1741)  
 SHIP women (n=1592)  
 TwinsUK (n=3270)  
**meta analysis:  $I^2=21.4$  (n=63299)**

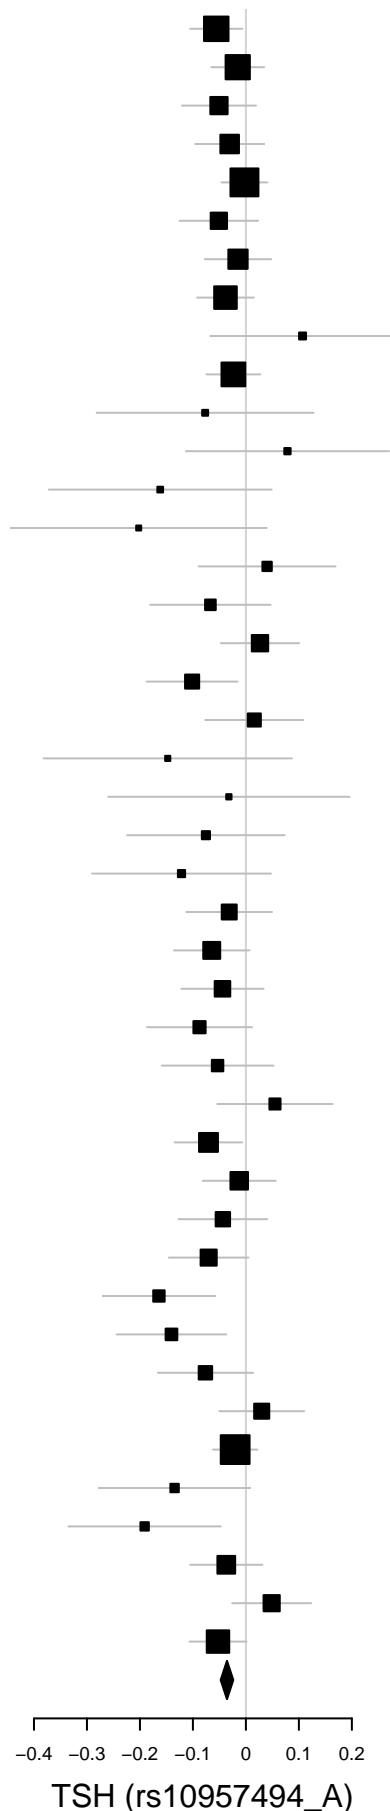

ARIC men (n=3639)  
ARIC women (n=3719)  
Busselton men (n=1873)  
Busselton women (n=2241)  
CHRIS (n=4051)  
CHS men (n=726)  
CHS women (n=1012)  
FHS (n=2240)  
GARP (n=290)  
GCKD (n=3386)  
GOYA cases (n=198)  
GOYA controls (n=269)  
HBCS men (n=223)  
HBCS women (n=189)  
Health2006 (n=2890)  
InCHIANTI men (n=483)  
InCHIANTI women (n=624)  
INGI Val (n=1541)  
Inter99 (n=5978)  
KORAF4 men (n=1176)  
KORAF4 women (n=1037)  
LBC1921 men (n=152)  
LBC1921 women (n=191)  
LBC1936 men (n=403)  
LBC1936 women (n=328)  
LifeLines men (n=1672)  
LifeLines women (n=2384)  
LLS 02112015 (n=2132)  
MICROS (n=1031)  
NBS men (n=842)  
NBS women (n=843)  
PROSPER men (n=2172)  
PROSPER women (n=2043)  
RSI men (n=1286)  
RSI women (n=1633)  
RSII men (n=848)  
RSII women (n=883)  
RSIII men (n=1208)  
RSIII women (n=1386)  
SardiNIA (n=5552)  
SHIP (n=369)  
SHIP (n=421)  
SHIP men (n=1741)  
SHIP women (n=1592)  
TwinsUK (n=3270)  
**meta analysis:  $I^2=28.6$  (n=66615)**

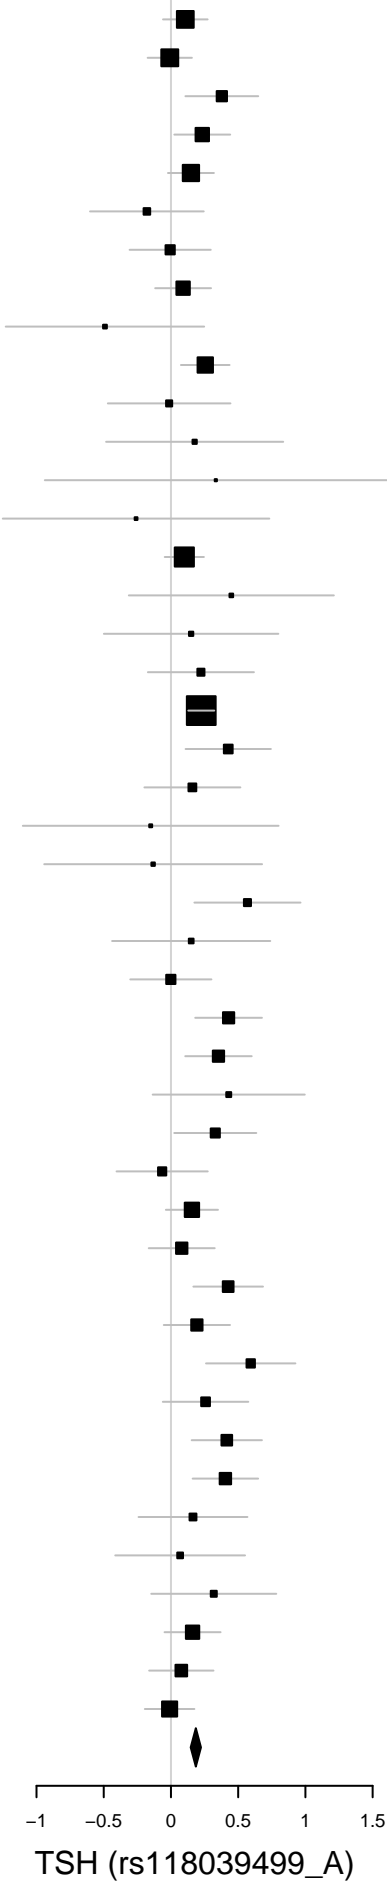

ARIC men (n=3639)  
 ARIC women (n=3719)  
 Busselton men (n=1873)  
 Busselton women (n=2241)  
 CHRIS (n=4051)  
 CHS men (n=726)  
 CHS women (n=1012)  
 FHS (n=2240)  
 GARP (n=290)  
 GCKD (n=3386)  
 GOYA cases (n=198)  
 GOYA controls (n=269)  
 HBCS men (n=223)  
 HBCS women (n=189)  
 InCHIANTI men (n=483)  
 InCHIANTI women (n=624)  
 INGI Val (n=1541)  
 KORAF4 men (n=1176)  
 KORAF4 women (n=1037)  
 LBC1921 men (n=152)  
 LBC1921 women (n=191)  
 LBC1936 men (n=403)  
 LBC1936 women (n=328)  
 LifeLines men (n=1672)  
 LifeLines women (n=2384)  
 LLS 02112015 (n=2132)  
 MICROS (n=1031)  
 NBS men (n=842)  
 NBS women (n=843)  
 PROSPER men (n=2172)  
 PROSPER women (n=2043)  
 RSI men (n=1286)  
 RSI women (n=1633)  
 RSII men (n=848)  
 RSII women (n=883)  
 RSIII men (n=1208)  
 RSIII women (n=1386)  
 SardiNIA (n=5552)  
 SHIP (n=369)  
 SHIP (n=421)  
 SHIP men (n=1741)  
 SHIP women (n=1592)  
 TwinsUK (n=3270)  
**meta analysis:  $I^2=10.4$  (n=63299)**

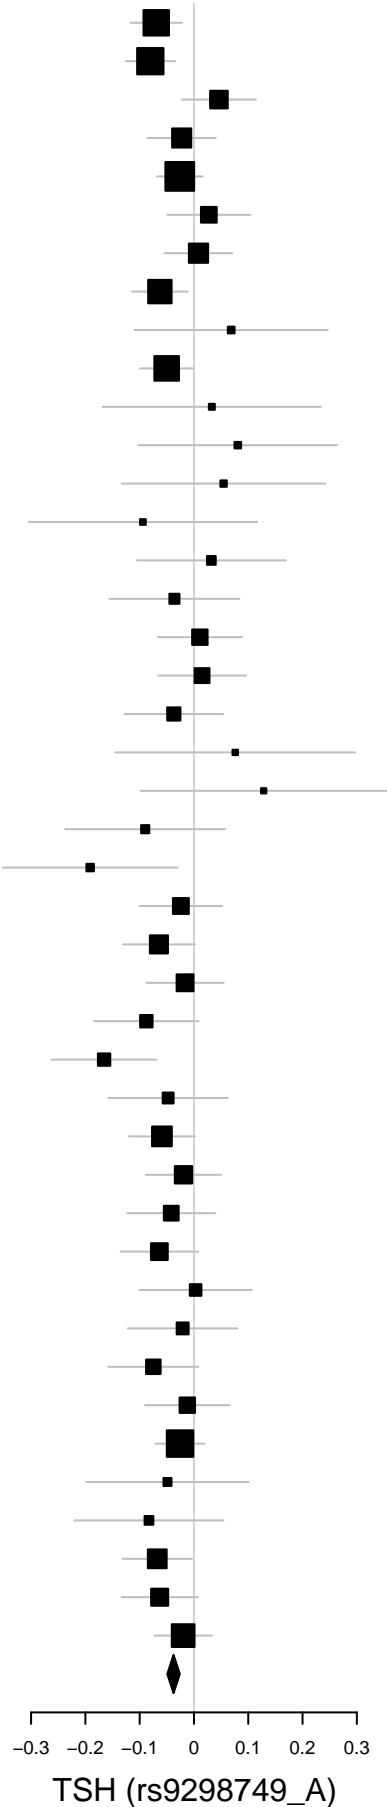

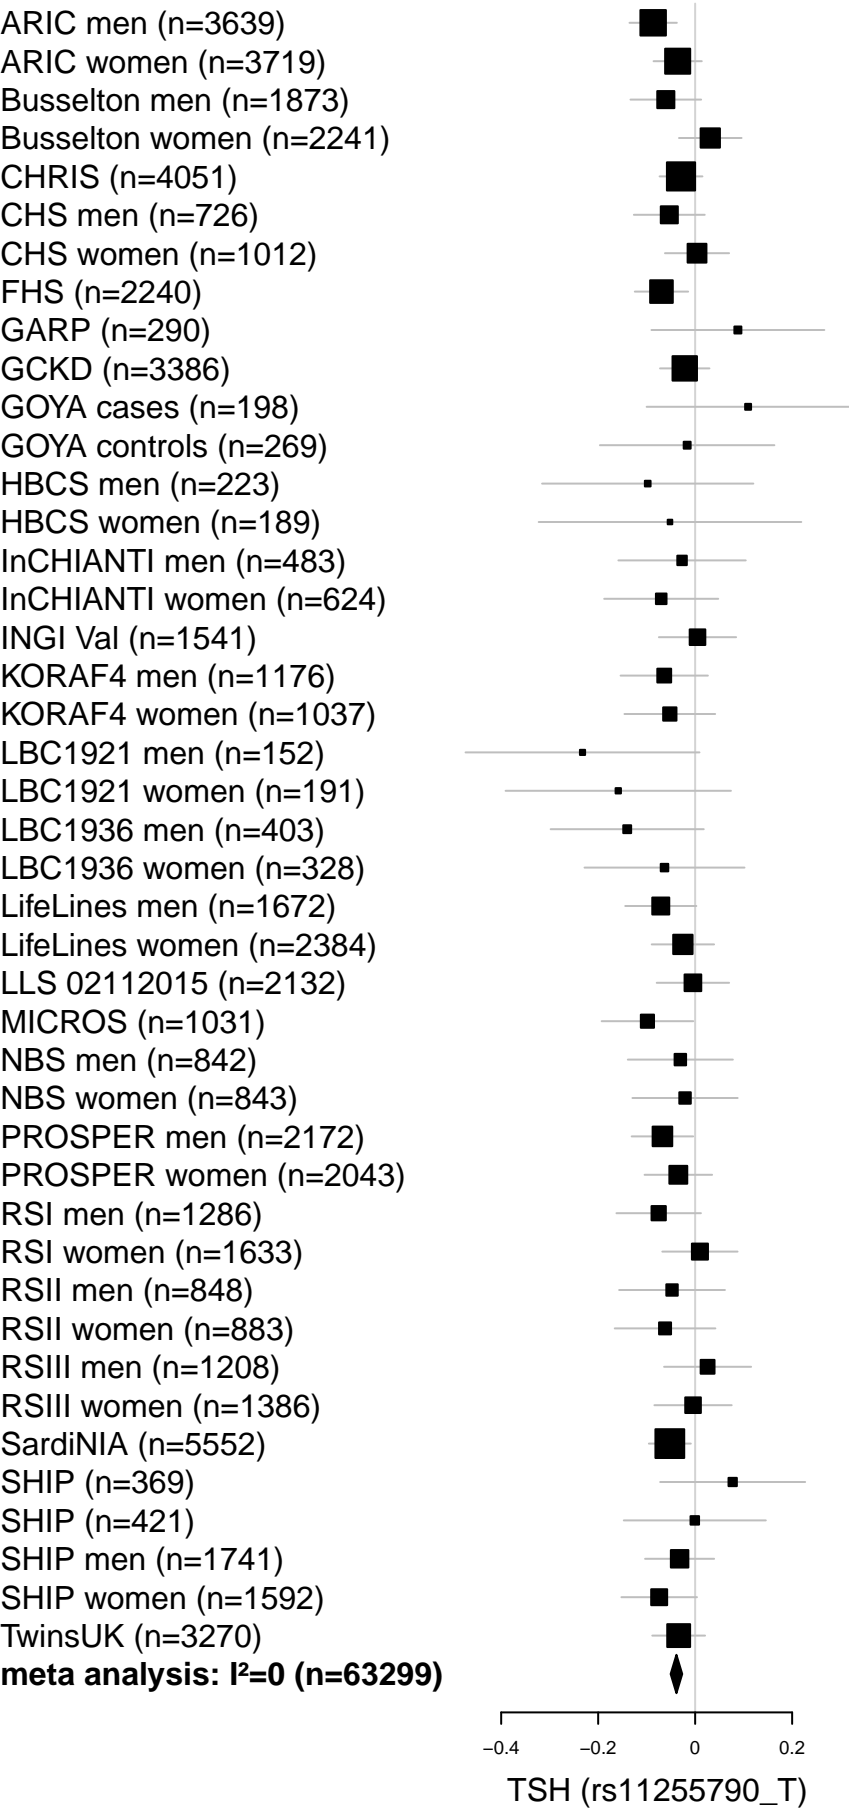



ARIC men (n=3639)  
 ARIC women (n=3719)  
 Busselton men (n=1873)  
 Busselton women (n=2241)  
 CHRIS (n=4051)  
 CHS men (n=726)  
 CHS women (n=1012)  
 FHS (n=2240)  
 GARP (n=290)  
 GCKD (n=3386)  
 GOYA cases (n=198)  
 GOYA controls (n=269)  
 HBCS men (n=223)  
 HBCS women (n=189)  
 InCHIANTI men (n=483)  
 InCHIANTI women (n=624)  
 INGI Val (n=1541)  
 KORAF4 men (n=1176)  
 KORAF4 women (n=1037)  
 LBC1921 men (n=152)  
 LBC1921 women (n=191)  
 LBC1936 men (n=403)  
 LBC1936 women (n=328)  
 LifeLines men (n=1672)  
 LifeLines women (n=2384)  
 LLS 02112015 (n=2132)  
 MICROS (n=1031)  
 NBS men (n=842)  
 NBS women (n=843)  
 PROSPER men (n=2172)  
 PROSPER women (n=2043)  
 RSI men (n=1286)  
 RSI women (n=1633)  
 RSII men (n=848)  
 RSII women (n=883)  
 RSIII men (n=1208)  
 RSIII women (n=1386)  
 SardiNIA (n=5552)  
 SHIP (n=369)  
 SHIP (n=421)  
 SHIP men (n=1741)  
 SHIP women (n=1592)  
 TwinsUK (n=3270)  
**meta analysis:  $I^2=24.3$  (n=63299)**

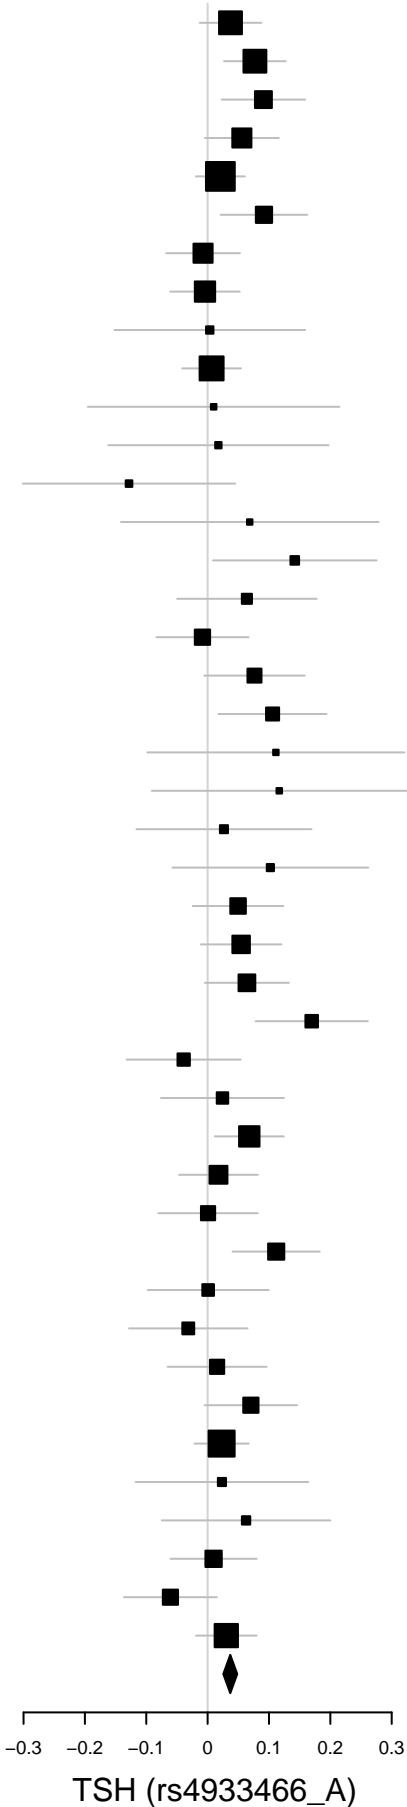

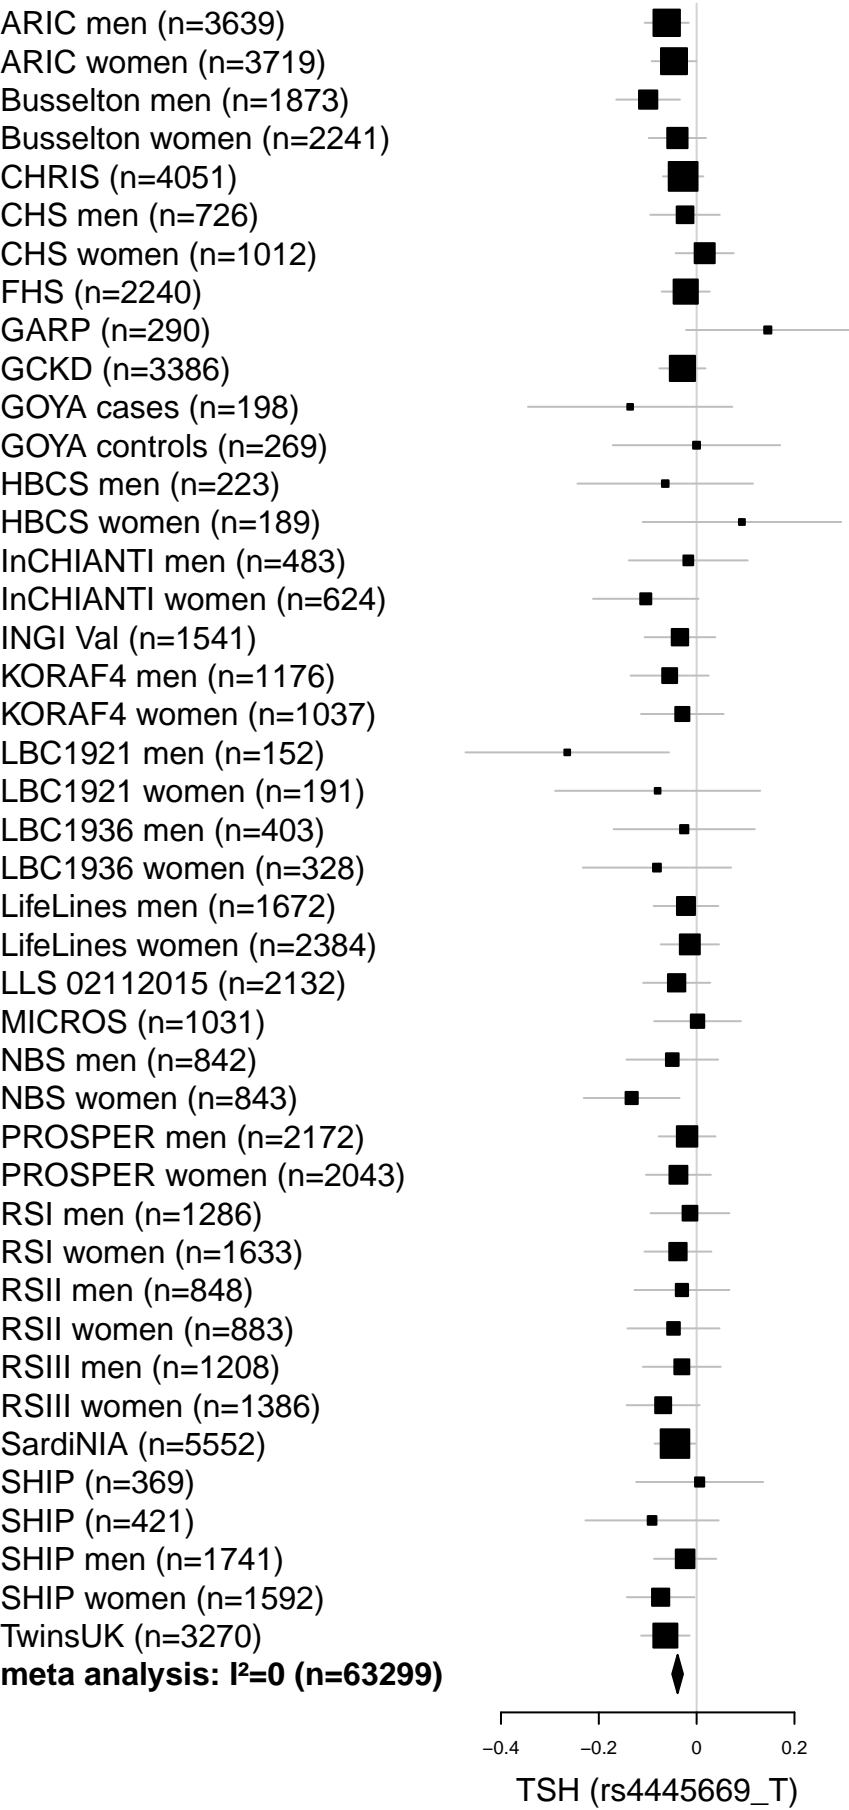

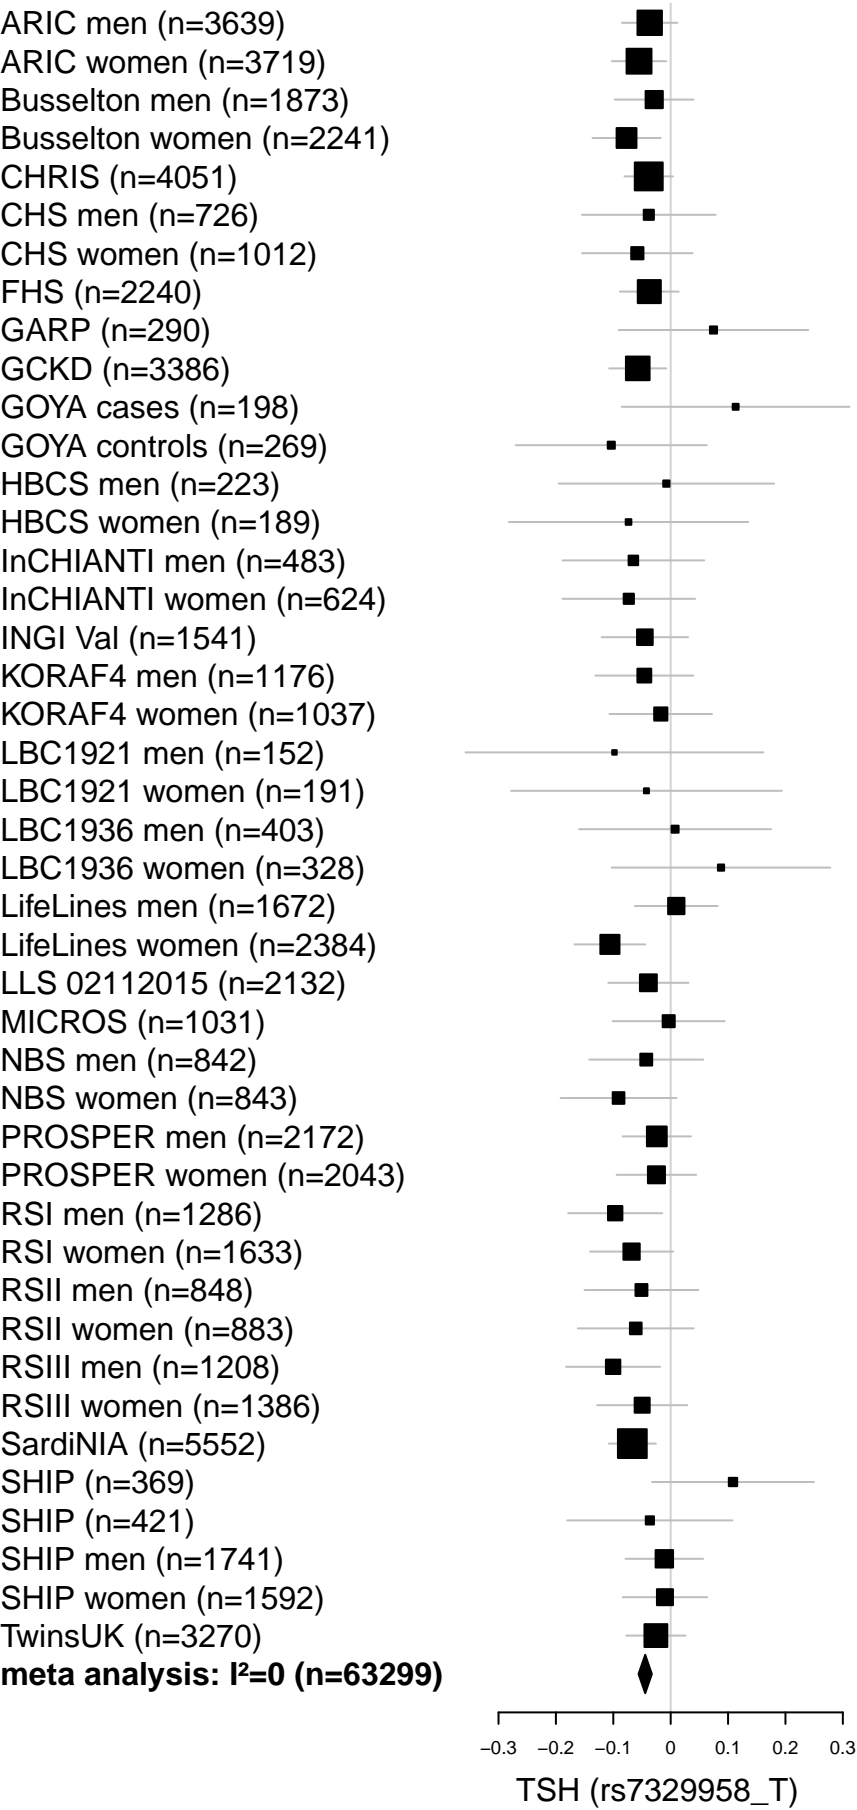

ARIC men (n=3639)  
 ARIC women (n=3719)  
 Busselton men (n=1873)  
 Busselton women (n=2241)  
 CHRIS (n=4051)  
 CHS men (n=726)  
 CHS women (n=1012)  
 FHS (n=2240)  
 GARP (n=290)  
 GCKD (n=3386)  
 GOYA cases (n=198)  
 GOYA controls (n=269)  
 HBCS men (n=223)  
 HBCS women (n=189)  
 InCHIANTI men (n=483)  
 InCHIANTI women (n=624)  
 INGI Val (n=1541)  
 KORAF4 men (n=1176)  
 KORAF4 women (n=1037)  
 LBC1921 men (n=152)  
 LBC1921 women (n=191)  
 LBC1936 men (n=403)  
 LBC1936 women (n=328)  
 LifeLines men (n=1672)  
 LifeLines women (n=2384)  
 LLS 02112015 (n=2132)  
 MICROS (n=1031)  
 NBS men (n=842)  
 NBS women (n=843)  
 PROSPER men (n=2172)  
 PROSPER women (n=2043)  
 RSI men (n=1286)  
 RSI women (n=1633)  
 RSII men (n=848)  
 RSII women (n=883)  
 RSIII men (n=1208)  
 RSIII women (n=1386)  
 SardiNIA (n=5552)  
 SHIP (n=369)  
 SHIP (n=421)  
 SHIP men (n=1741)  
 SHIP women (n=1592)  
 TwinsUK (n=3270)  
**meta analysis:  $I^2=27.4$  (n=63299)**

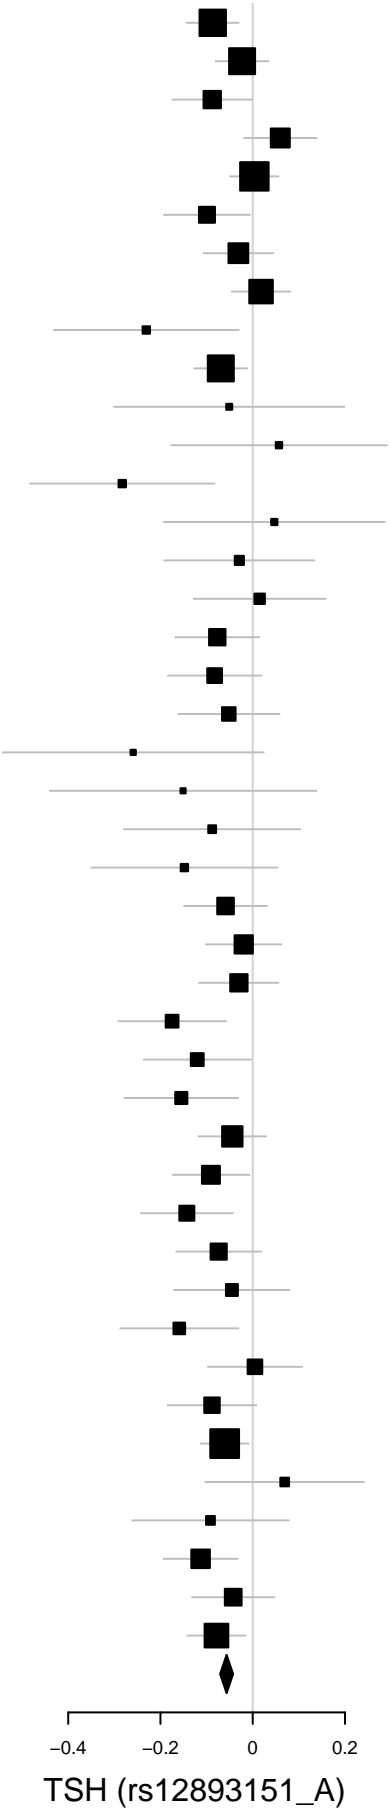

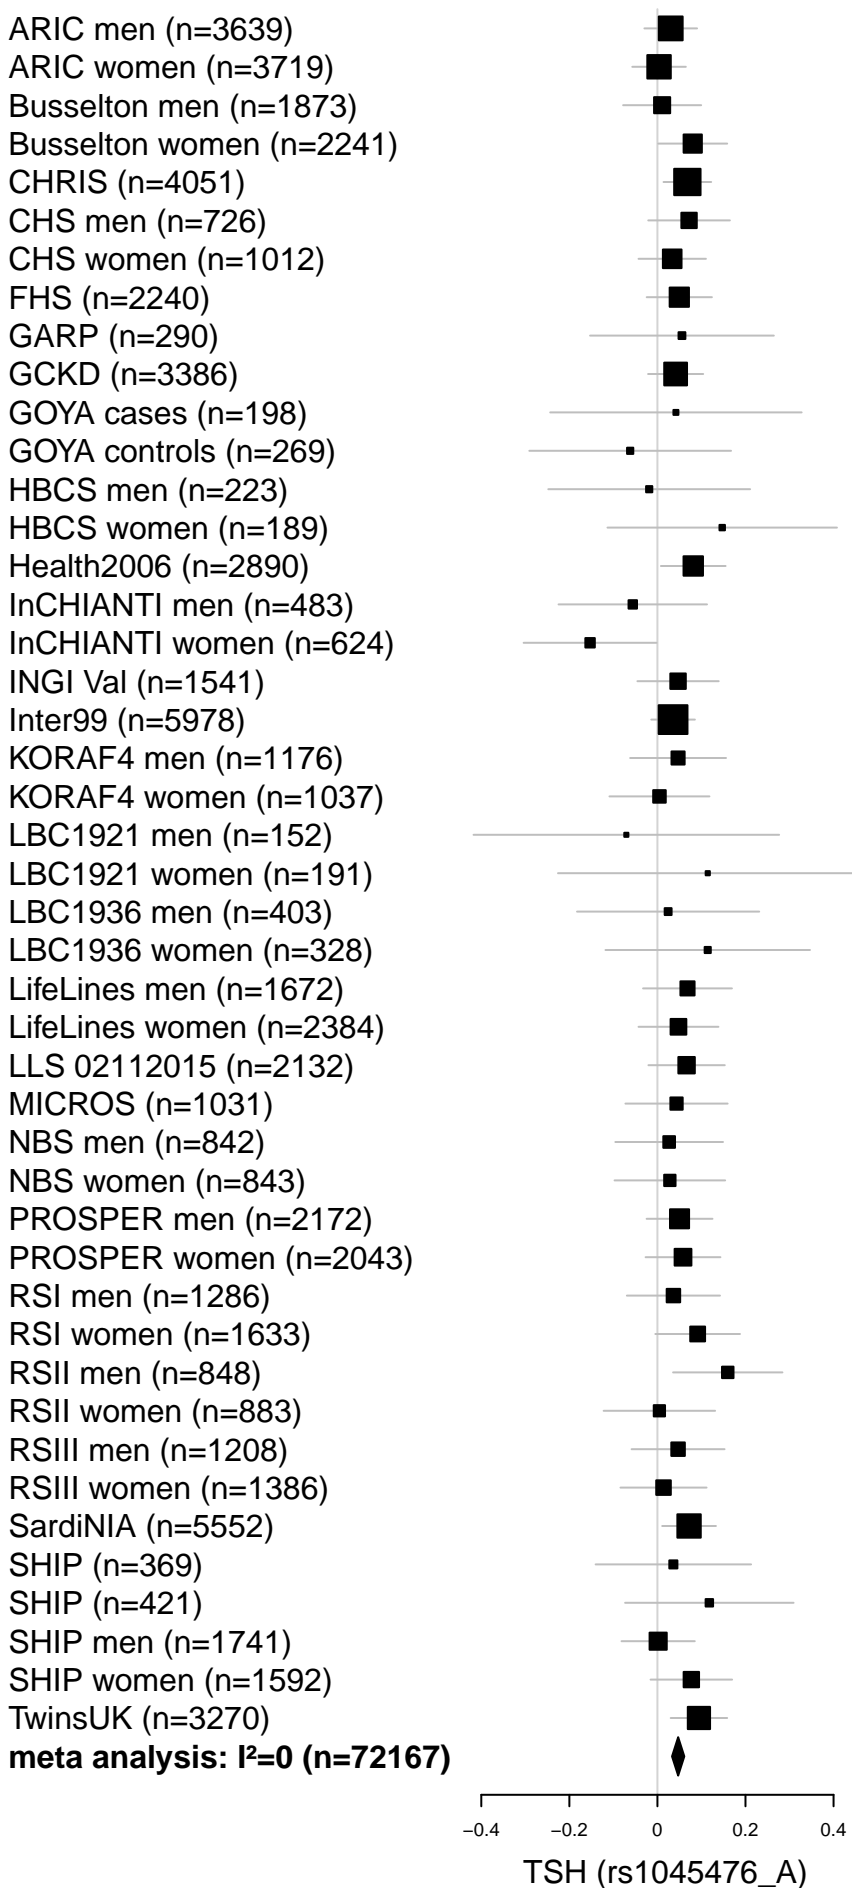

ARIC men (n=3639)  
ARIC women (n=3719)  
Busselton men (n=1873)  
Busselton women (n=2241)  
CHRIS (n=4051)  
CHS men (n=726)  
CHS women (n=1012)  
FHS (n=2240)  
GARP (n=290)  
GCKD (n=3386)  
GOYA cases (n=198)  
GOYA controls (n=269)  
HBCS men (n=223)  
HBCS women (n=189)  
Health2006 (n=2890)  
InCHIANTI men (n=483)  
InCHIANTI women (n=624)  
INGI Val (n=1541)  
Inter99 (n=5978)  
KORAF4 men (n=1176)  
KORAF4 women (n=1037)  
LBC1921 men (n=152)  
LBC1921 women (n=191)  
LBC1936 men (n=403)  
LBC1936 women (n=328)  
LifeLines men (n=1672)  
LifeLines women (n=2384)  
LLS 02112015 (n=2132)  
MICROS (n=1031)  
NBS men (n=842)  
NBS women (n=843)  
PROSPER men (n=2172)  
PROSPER women (n=2043)  
RSI men (n=1286)  
RSI women (n=1633)  
RSII men (n=848)  
RSII women (n=883)  
RSIII men (n=1208)  
RSIII women (n=1386)  
SardiNIA (n=5552)  
SHIP (n=369)  
SHIP (n=421)  
SHIP men (n=1741)  
SHIP women (n=1592)  
TwinsUK (n=3270)  
**meta analysis: I<sup>2</sup>=3 (n=72167)**

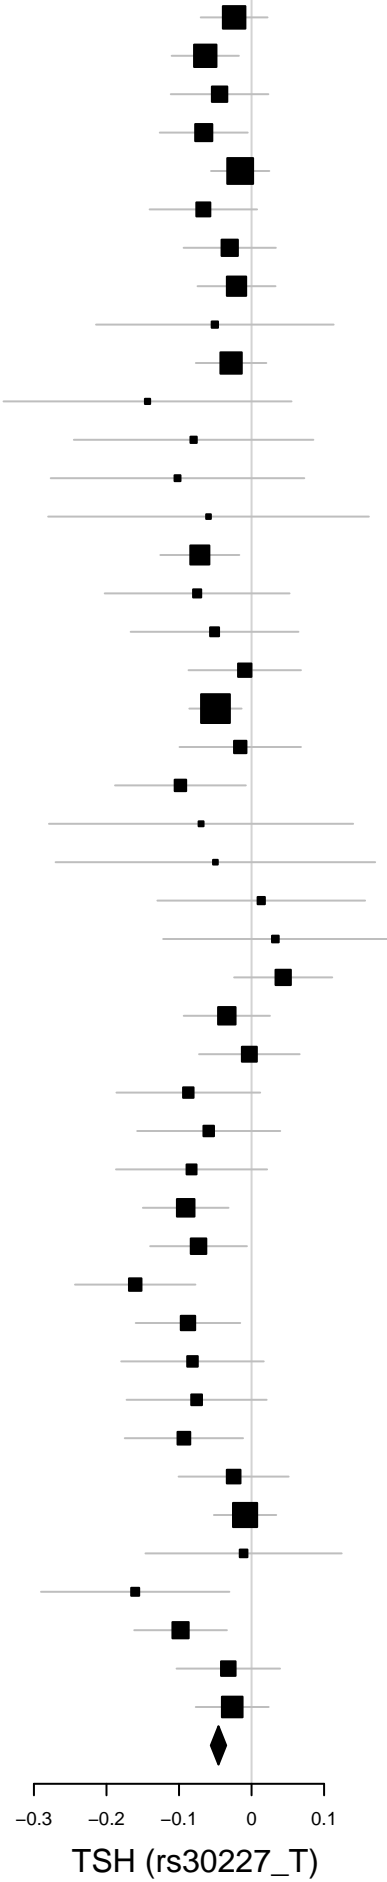

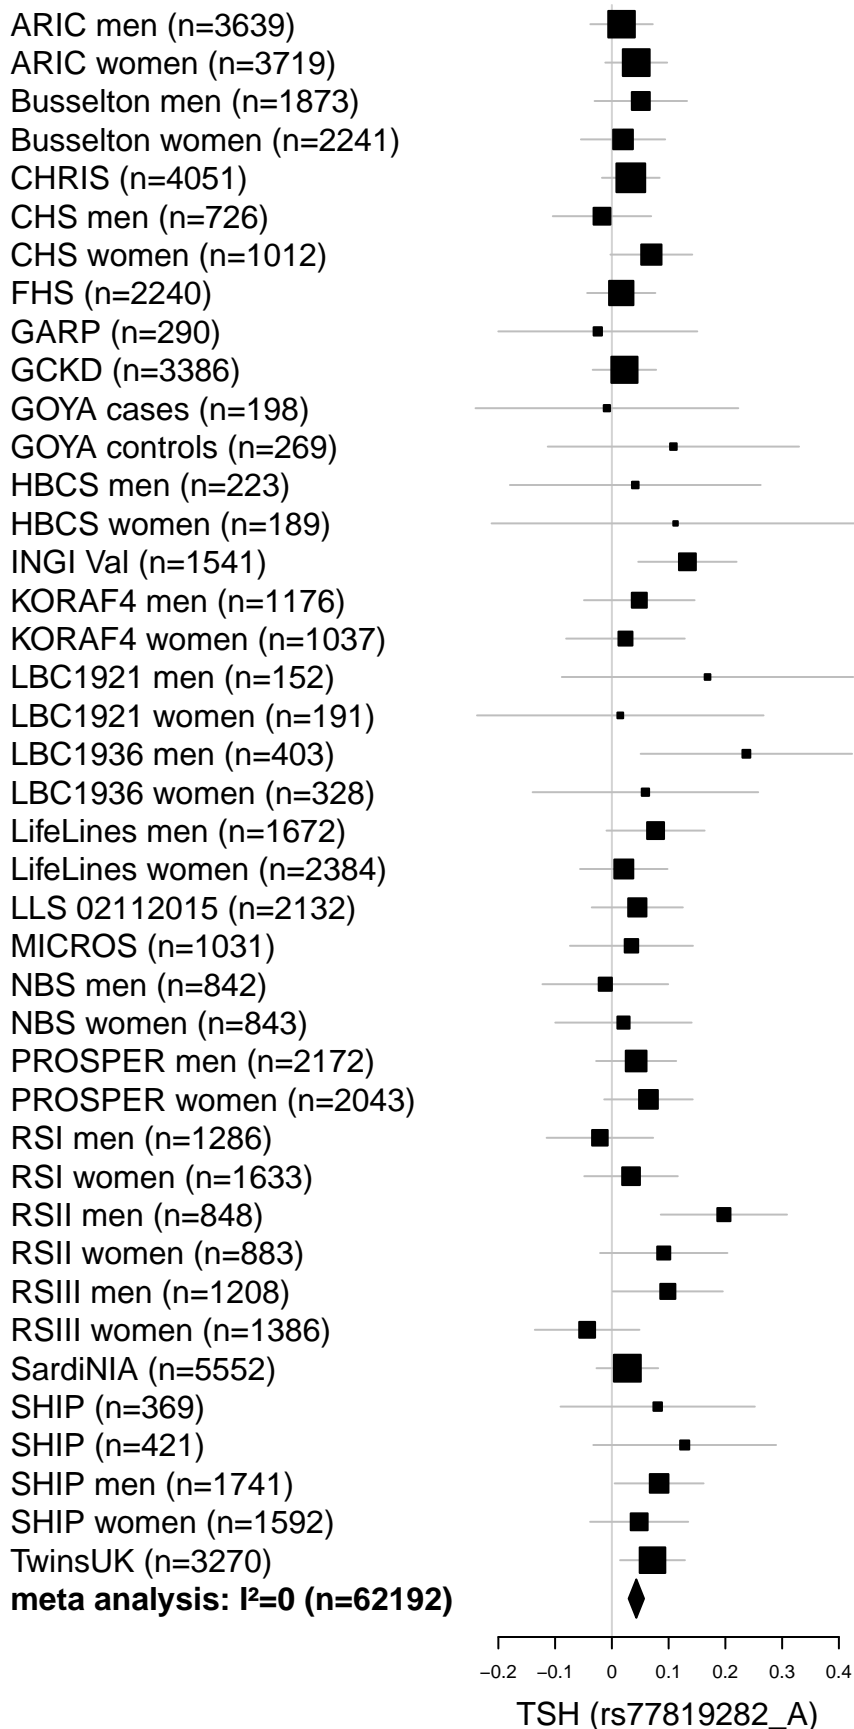

ARIC men (n=3639)  
 ARIC women (n=3719)  
 Busselton men (n=1873)  
 Busselton women (n=2241)  
 CHRIS (n=4051)  
 CHS men (n=726)  
 CHS women (n=1012)  
 FHS (n=2240)  
 GARP (n=290)  
 GCKD (n=3386)  
 GOYA cases (n=198)  
 GOYA controls (n=269)  
 HBCS men (n=223)  
 HBCS women (n=189)  
 InCHIANTI men (n=483)  
 InCHIANTI women (n=624)  
 INGI Val (n=1541)  
 KORAF4 men (n=1176)  
 KORAF4 women (n=1037)  
 LBC1921 men (n=152)  
 LBC1921 women (n=191)  
 LBC1936 men (n=403)  
 LBC1936 women (n=328)  
 LifeLines men (n=1672)  
 LifeLines women (n=2384)  
 LLS 02112015 (n=2132)  
 MICROS (n=1031)  
 NBS men (n=842)  
 NBS women (n=843)  
 PROSPER men (n=2172)  
 PROSPER women (n=2043)  
 RSI men (n=1286)  
 RSI women (n=1633)  
 RSII men (n=848)  
 RSII women (n=883)  
 RSIII men (n=1208)  
 RSIII women (n=1386)  
 SardiNIA (n=5552)  
 SHIP (n=369)  
 SHIP (n=421)  
 SHIP men (n=1741)  
 SHIP women (n=1592)  
 TwinsUK (n=3270)  
**meta analysis: I<sup>2</sup>=21 (n=59243)**

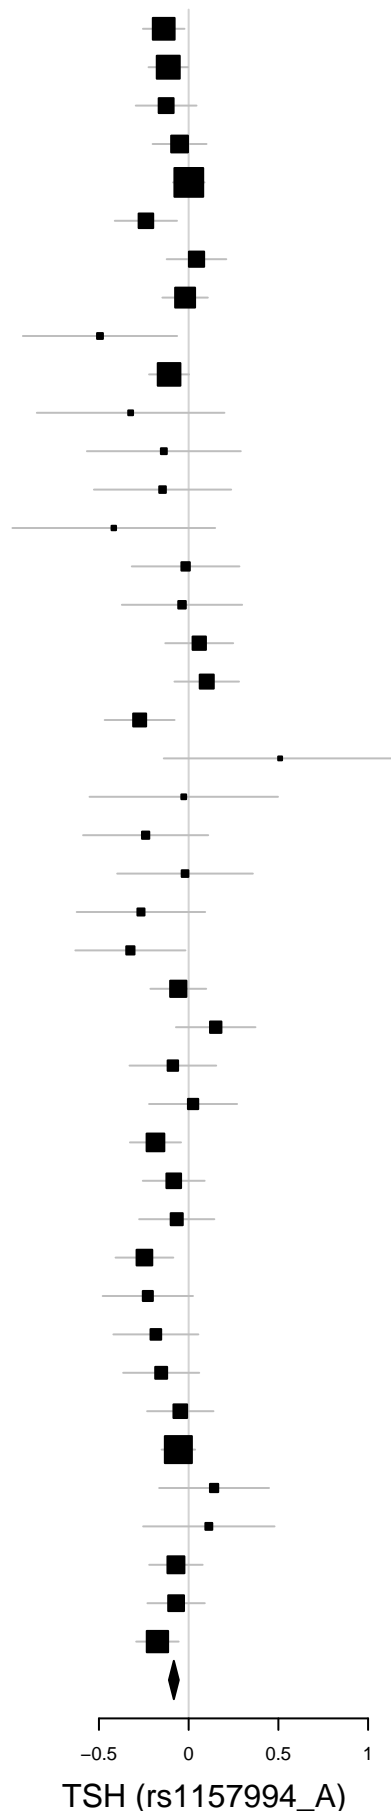



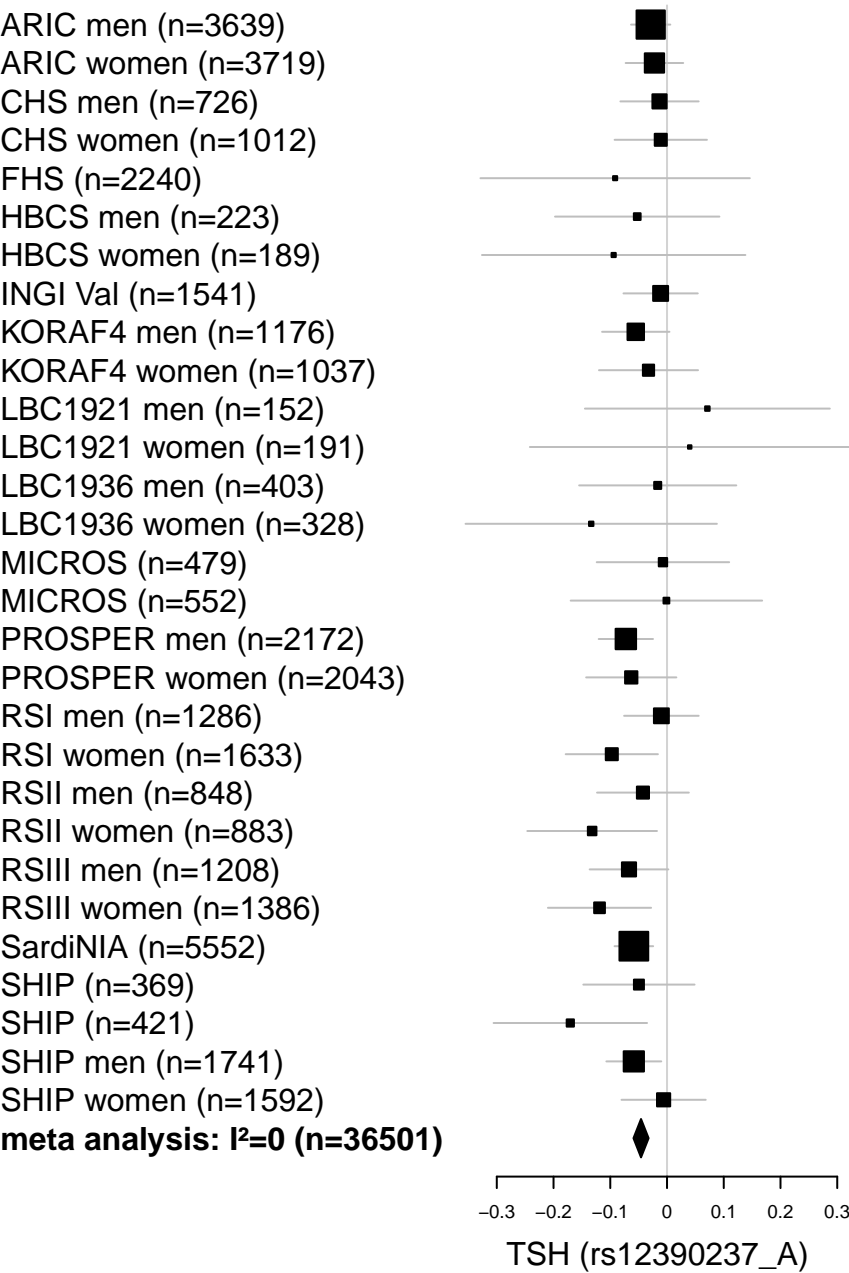

Forest plots of the 19 index SNPs of replicated susceptibility loci for TSH in the combined discovery and replication samples. Effects and their 95% confidence intervals are based on inverse normalized TSH values.  $I^2$  is the percentage of total variation across studies that is due to heterogeneity.

**Supplementary Figure 5: Forest plots for FT4**

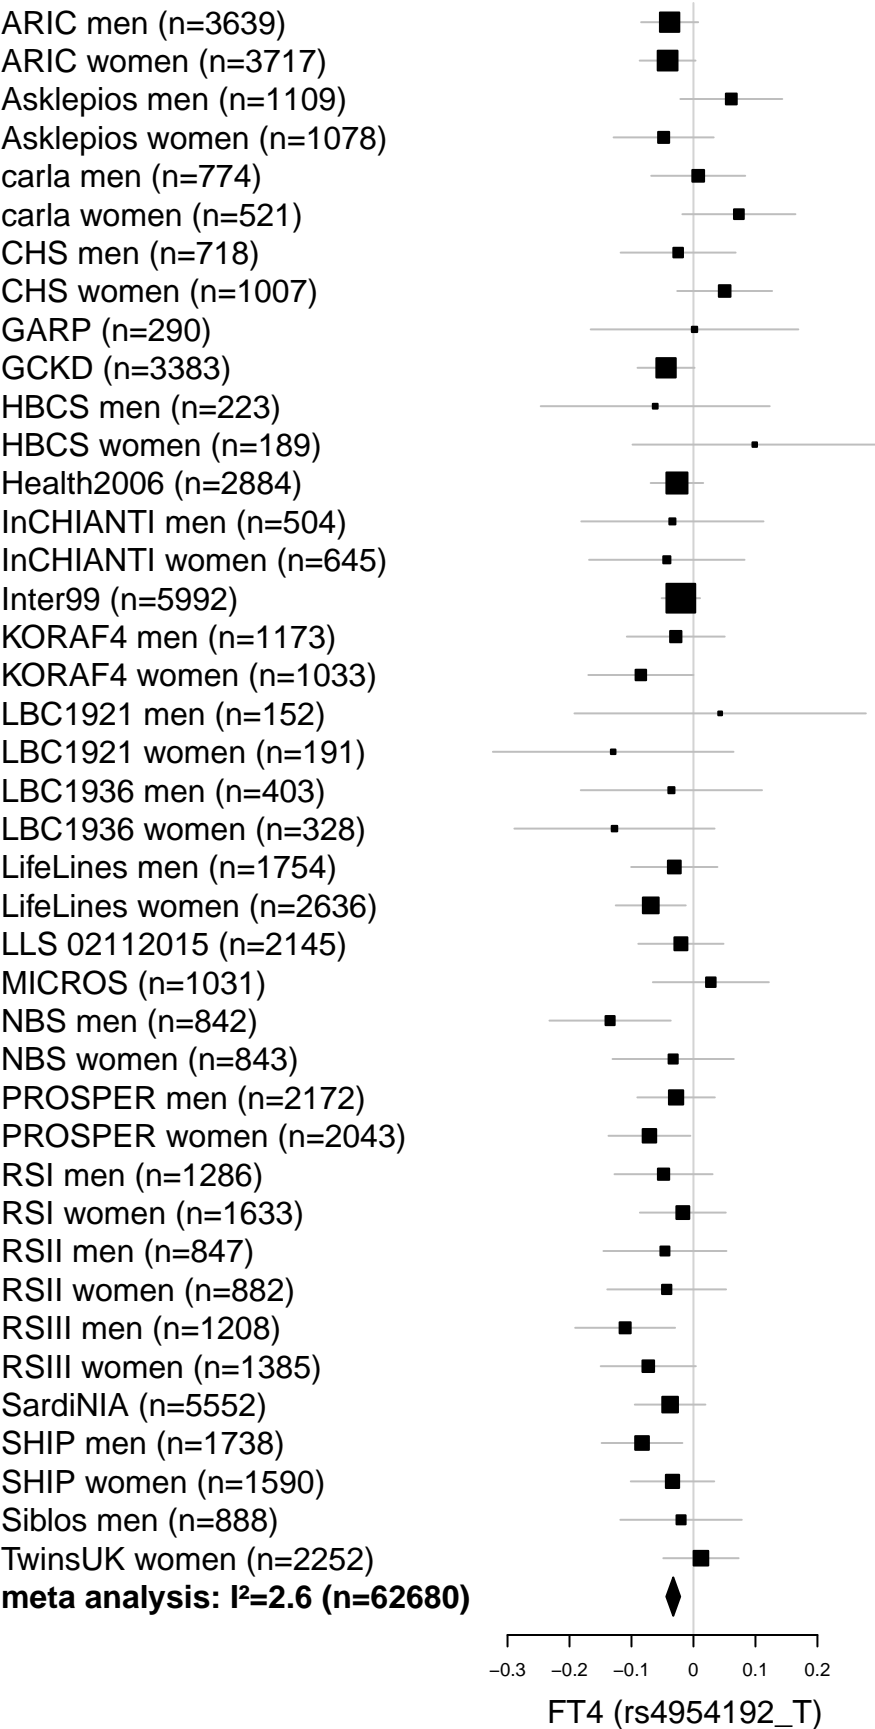

ARIC men (n=3639)  
ARIC women (n=3717)  
Busselton men (n=1955)  
Busselton women (n=2412)  
carla men (n=774)  
carla women (n=521)  
CHS men (n=718)  
CHS women (n=1007)  
GARP (n=290)  
GCKD (n=3383)  
HBCS men (n=223)  
HBCS women (n=189)  
InCHIANTI men (n=504)  
InCHIANTI women (n=645)  
KORAF4 men (n=1173)  
KORAF4 women (n=1033)  
LBC1921 men (n=152)  
LBC1921 women (n=191)  
LBC1936 men (n=403)  
LBC1936 women (n=328)  
LifeLines men (n=1754)  
LifeLines women (n=2636)  
LLS 02112015 (n=2145)  
MICROS (n=1031)  
NBS men (n=842)  
NBS women (n=843)  
PROSPER men (n=2172)  
PROSPER women (n=2043)  
RSI men (n=1286)  
RSI women (n=1633)  
RSII men (n=847)  
RSII women (n=882)  
RSIII men (n=1208)  
RSIII women (n=1385)  
SardiNIA (n=5552)  
SHIP men (n=1738)  
SHIP women (n=1590)  
TwinsUK women (n=2252)  
**meta analysis: I<sup>2</sup>=7.4 (n=55096)**

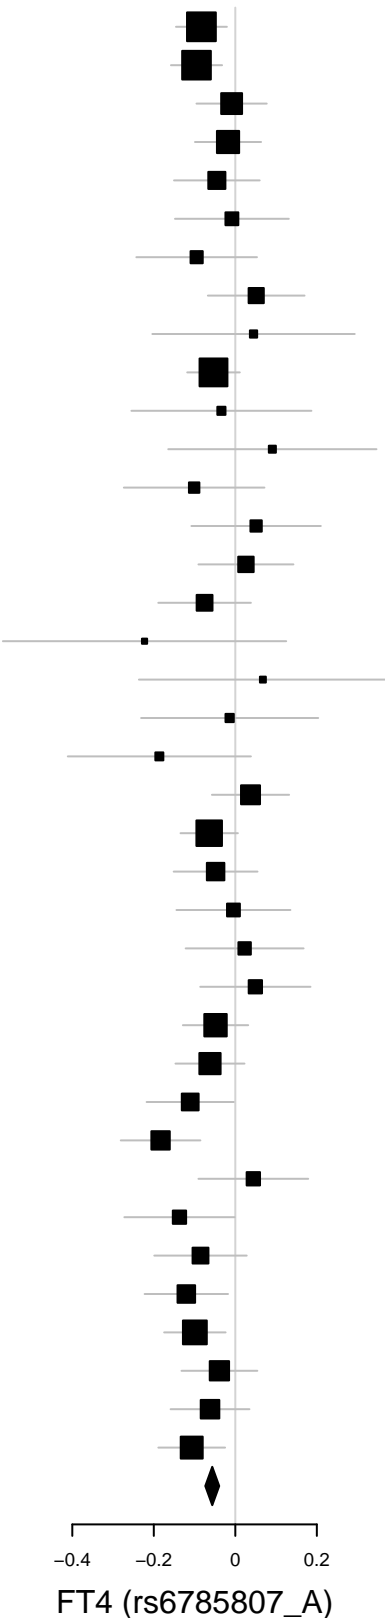

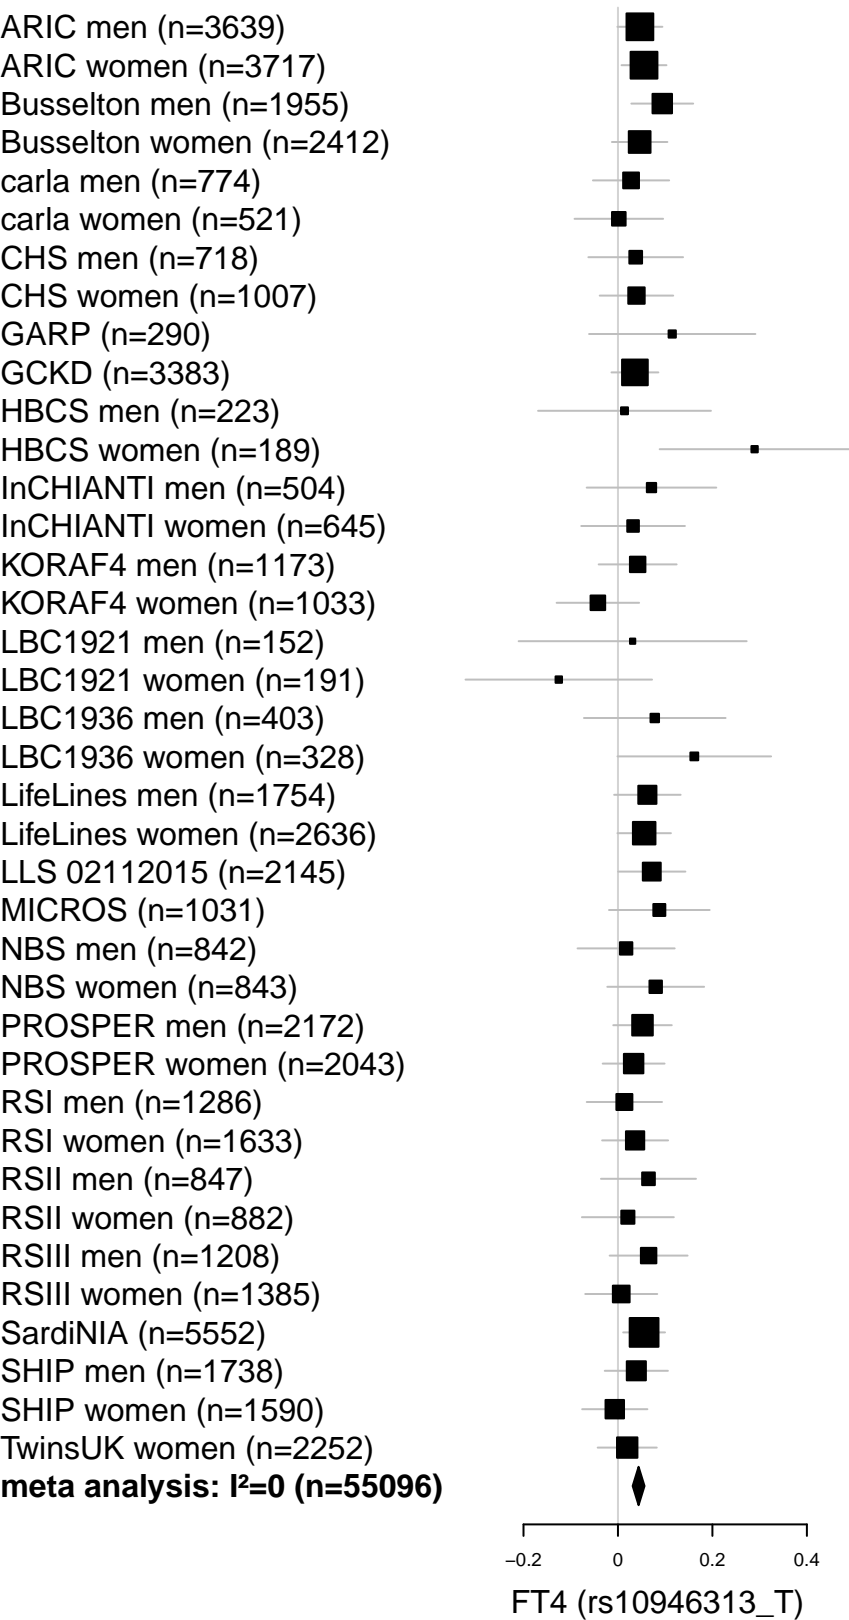

ARIC men (n=3639)  
ARIC women (n=3717)  
Busselton men (n=1955)  
Busselton women (n=2412)  
carla men (n=774)  
carla women (n=521)  
CHS men (n=718)  
CHS women (n=1007)  
GARP (n=290)  
GCKD (n=3383)  
HBCS men (n=223)  
HBCS women (n=189)  
InCHIANTI men (n=504)  
InCHIANTI women (n=645)  
KORAF4 men (n=1173)  
KORAF4 women (n=1033)  
LBC1921 men (n=152)  
LBC1921 women (n=191)  
LBC1936 men (n=403)  
LBC1936 women (n=328)  
LifeLines men (n=1754)  
LifeLines women (n=2636)  
LLS 02112015 (n=2145)  
MICROS (n=1031)  
NBS men (n=842)  
NBS women (n=843)  
PROSPER men (n=2172)  
PROSPER women (n=2043)  
RSI men (n=1286)  
RSI women (n=1633)  
RSII men (n=847)  
RSII women (n=882)  
RSIII men (n=1208)  
RSIII women (n=1385)  
SardiNIA (n=5552)  
SHIP men (n=1738)  
SHIP women (n=1590)  
TwinsUK women (n=2252)  
**meta analysis: I<sup>2</sup>=0 (n=55096)**

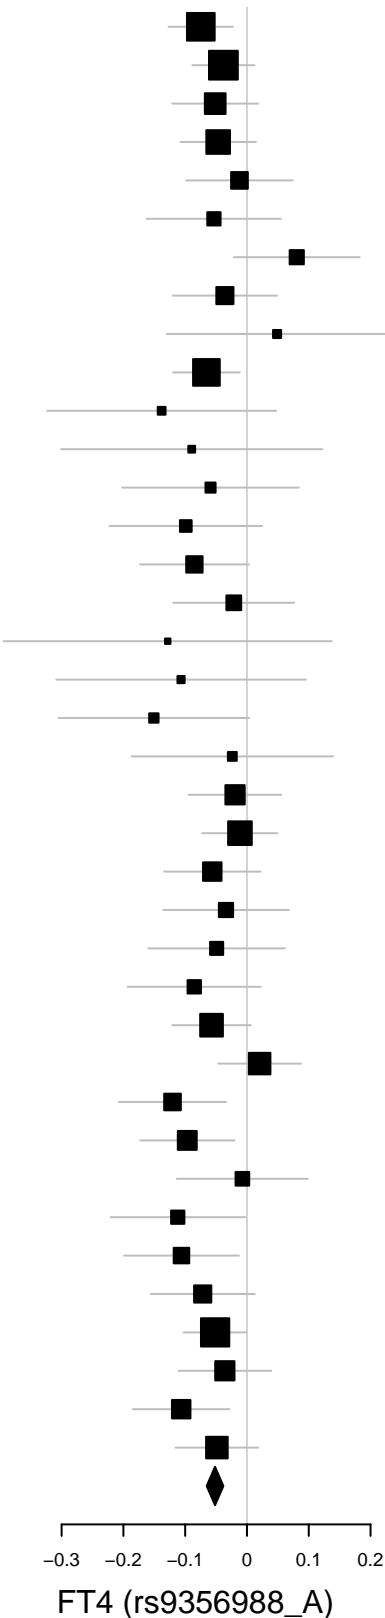

ARIC men (n=3639)  
ARIC women (n=3717)  
Busselton men (n=1955)  
Busselton women (n=2412)  
CHS men (n=718)  
CHS women (n=1007)  
GARP (n=290)  
GCKD (n=3383)  
HBCS men (n=223)  
HBCS women (n=189)  
InCHIANTI men (n=504)  
InCHIANTI women (n=645)  
KORAF4 men (n=1173)  
KORAF4 women (n=1033)  
LBC1921 men (n=152)  
LBC1921 women (n=191)  
LBC1936 men (n=403)  
LBC1936 women (n=328)  
LifeLines men (n=1754)  
LifeLines women (n=2636)  
LLS 02112015 (n=2145)  
MICROS (n=1031)  
NBS men (n=842)  
NBS women (n=843)  
PROSPER men (n=2172)  
PROSPER women (n=2043)  
RSI men (n=1286)  
RSI women (n=1633)  
RSII men (n=847)  
RSII women (n=882)  
RSIII men (n=1208)  
RSIII women (n=1385)  
SardiNIA (n=5552)  
SHIP men (n=1738)  
SHIP women (n=1590)  
TwinsUK women (n=2252)  
**meta analysis: I<sup>2</sup>=0 (n=53801)**

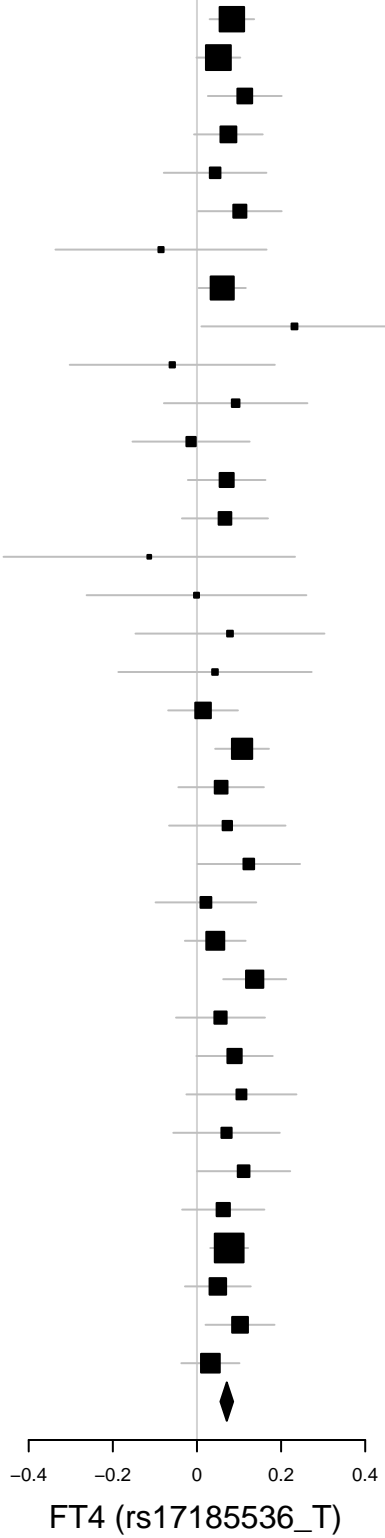

ARIC men (n=3639)  
ARIC women (n=3717)  
Busselton men (n=1955)  
Busselton women (n=2412)  
CHS men (n=718)  
CHS women (n=1007)  
GARP (n=290)  
GCKD (n=3383)  
HBCS men (n=223)  
HBCS women (n=189)  
InCHIANTI men (n=504)  
InCHIANTI women (n=645)  
KORAF4 men (n=1173)  
KORAF4 women (n=1033)  
LBC1921 men (n=152)  
LBC1921 women (n=191)  
LBC1936 men (n=403)  
LBC1936 women (n=328)  
LifeLines men (n=1754)  
LifeLines women (n=2636)  
LLS 02112015 (n=2145)  
MICROS (n=1031)  
NBS men (n=842)  
NBS women (n=843)  
PROSPER men (n=2172)  
PROSPER women (n=2043)  
RSI men (n=1286)  
RSI women (n=1633)  
RSII men (n=847)  
RSII women (n=882)  
RSIII men (n=1208)  
RSIII women (n=1385)  
SardiNIA (n=5552)  
SHIP men (n=1738)  
SHIP women (n=1590)  
TwinsUK women (n=2252)  
**meta analysis: I<sup>2</sup>=0 (n=53801)**

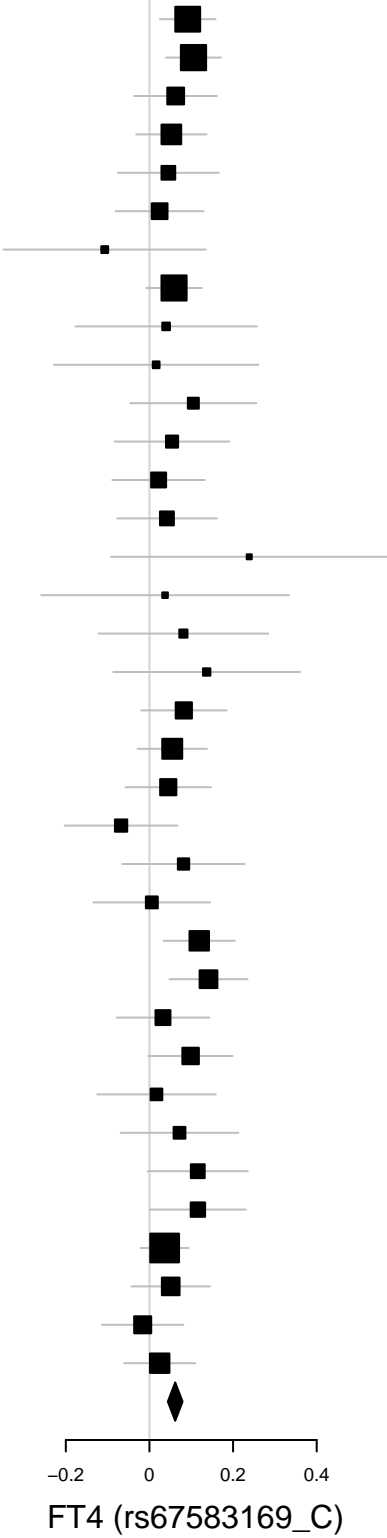



ARIC men (n=3639)  
 ARIC women (n=3717)  
 Asklepios men (n=1137)  
 Asklepios women (n=1106)  
 Busselton men (n=1955)  
 Busselton women (n=2412)  
 CHS men (n=718)  
 CHS women (n=1007)  
 GARP (n=290)  
 GCKD (n=3383)  
 HBCS men (n=223)  
 HBCS women (n=189)  
 InCHIANTI men (n=504)  
 InCHIANTI women (n=645)  
 KORAF4 men (n=1173)  
 KORAF4 women (n=1033)  
 LBC1921 men (n=152)  
 LBC1921 women (n=191)  
 LBC1936 men (n=403)  
 LBC1936 women (n=328)  
 LifeLines men (n=1754)  
 LifeLines women (n=2636)  
 LLS 02112015 (n=2145)  
 MICROS (n=1031)  
 NBS men (n=842)  
 NBS women (n=843)  
 PROSPER men (n=2172)  
 PROSPER women (n=2043)  
 RSI men (n=1286)  
 RSI women (n=1633)  
 RSII men (n=847)  
 RSII women (n=882)  
 RSIII men (n=1208)  
 RSIII women (n=1385)  
 SardiNIA (n=5552)  
 SHIP men (n=1738)  
 SHIP women (n=1590)  
 Siblos men (n=892)  
 TwinsUK women (n=2252)  
**meta analysis: I<sup>2</sup>=6.4 (n=56936)**

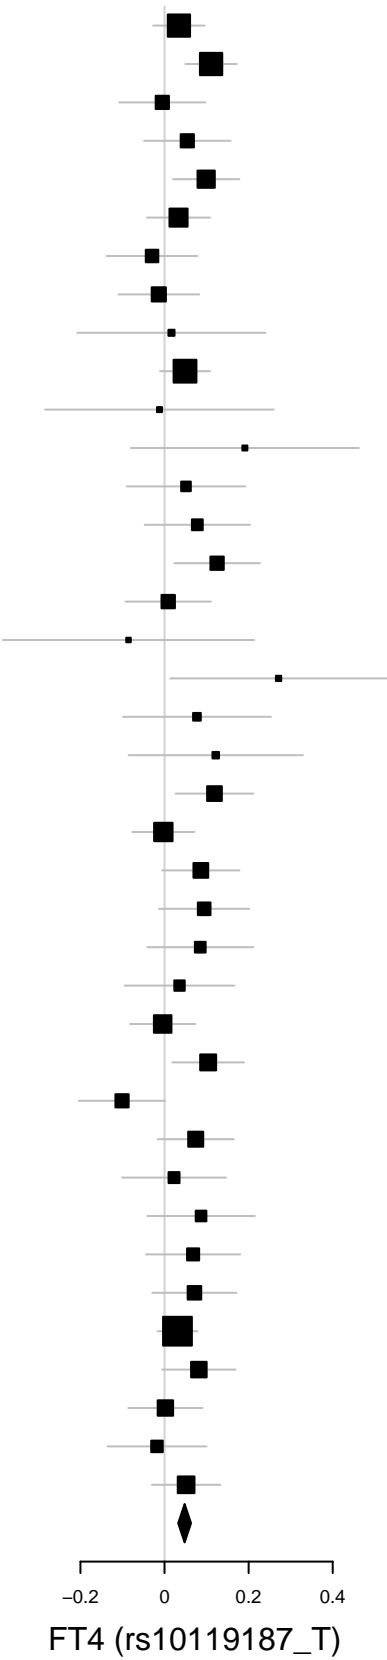

ARIC men (n=3639)  
 ARIC women (n=3717)  
 Busselton men (n=1955)  
 Busselton women (n=2412)  
 carla men (n=773)  
 carla women (n=521)  
 CHS men (n=718)  
 CHS women (n=1007)  
 GARP (n=290)  
 GCKD (n=3383)  
 HBCS men (n=223)  
 HBCS women (n=189)  
 Health2006 (n=2884)  
 InCHIANTI men (n=504)  
 InCHIANTI women (n=645)  
 Inter99 (n=5992)  
 KORAF4 men (n=1173)  
 KORAF4 women (n=1033)  
 LBC1921 men (n=152)  
 LBC1921 women (n=191)  
 LBC1936 men (n=403)  
 LBC1936 women (n=328)  
 LifeLines men (n=1754)  
 LifeLines women (n=2636)  
 LLS 02112015 (n=2145)  
 MICROS (n=1031)  
 NBS men (n=842)  
 NBS women (n=843)  
 PROSPER men (n=2172)  
 PROSPER women (n=2043)  
 RSI men (n=1286)  
 RSI women (n=1633)  
 RSII men (n=847)  
 RSII women (n=882)  
 RSIII men (n=1208)  
 RSIII women (n=1385)  
 SardiNIA (n=5552)  
 SHIP men (n=1738)  
 SHIP women (n=1590)  
 TwinsUK women (n=2252)  
**meta analysis:  $I^2=15.8$  (n=63971)**

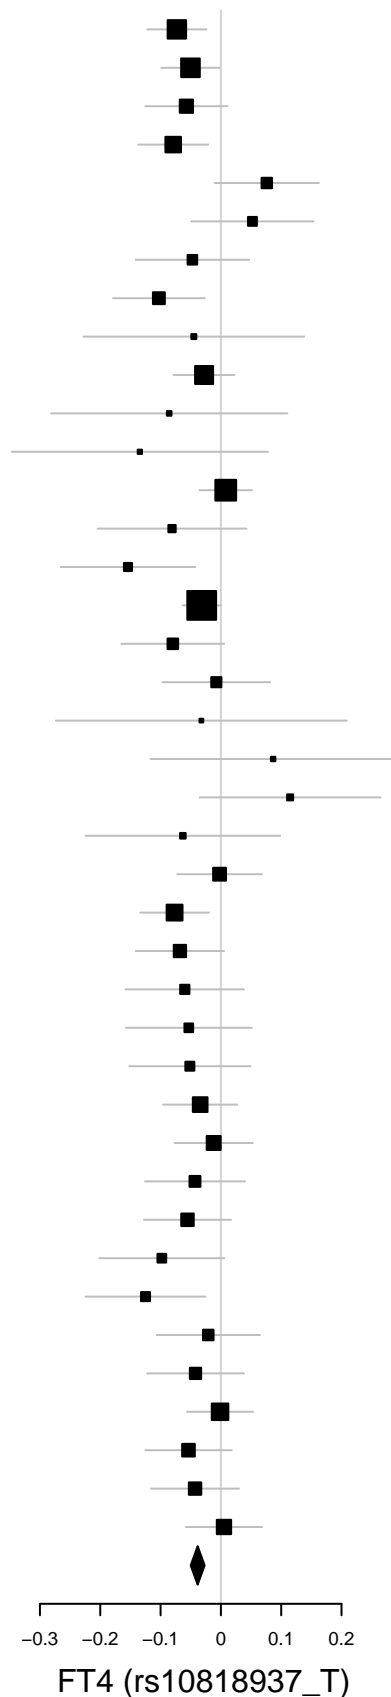

ARIC men (n=3639)  
 ARIC women (n=3717)  
 Busselton men (n=1955)  
 Busselton women (n=2412)  
 CHS men (n=718)  
 CHS women (n=1007)  
 GARP (n=290)  
 GCKD (n=3383)  
 HBCS men (n=223)  
 HBCS women (n=189)  
 Health2006 (n=2884)  
 InCHIANTI men (n=504)  
 InCHIANTI women (n=645)  
 Inter99 (n=5992)  
 KORAF4 men (n=1173)  
 KORAF4 women (n=1033)  
 LBC1921 men (n=152)  
 LBC1921 women (n=191)  
 LBC1936 men (n=403)  
 LBC1936 women (n=328)  
 LifeLines men (n=1754)  
 LifeLines women (n=2636)  
 LLS 02112015 (n=2145)  
 MICROS (n=1031)  
 NBS men (n=842)  
 NBS women (n=843)  
 PROSPER men (n=2172)  
 PROSPER women (n=2043)  
 RSI men (n=1286)  
 RSI women (n=1633)  
 RSII men (n=847)  
 RSII women (n=882)  
 RSIII men (n=1208)  
 RSIII women (n=1385)  
 SardiNIA (n=5552)  
 SHIP men (n=1738)  
 SHIP women (n=1590)  
 TwinsUK women (n=2252)  
**meta analysis:  $I^2=12.2$  (n=62677)**

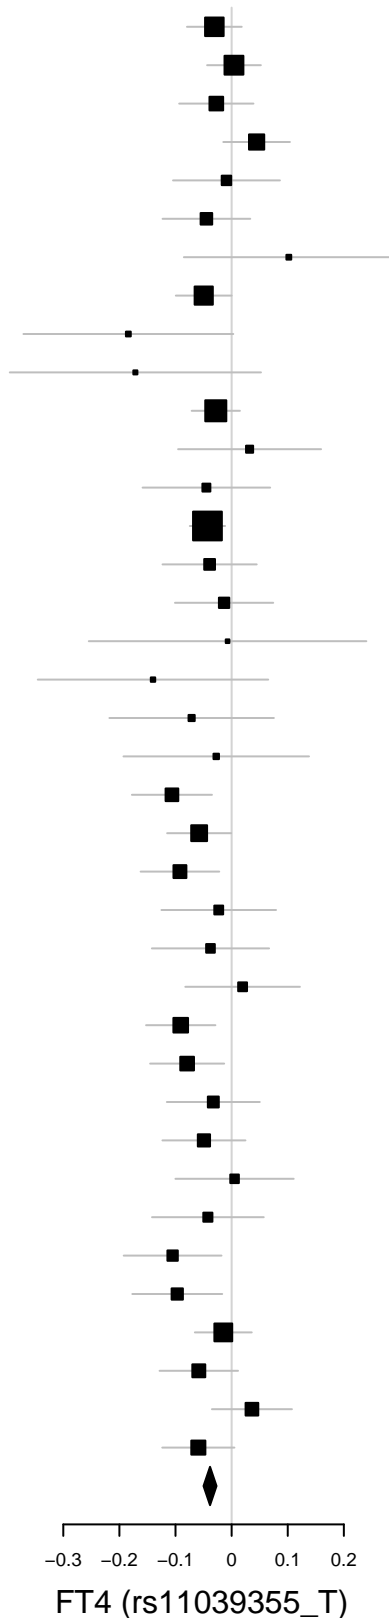

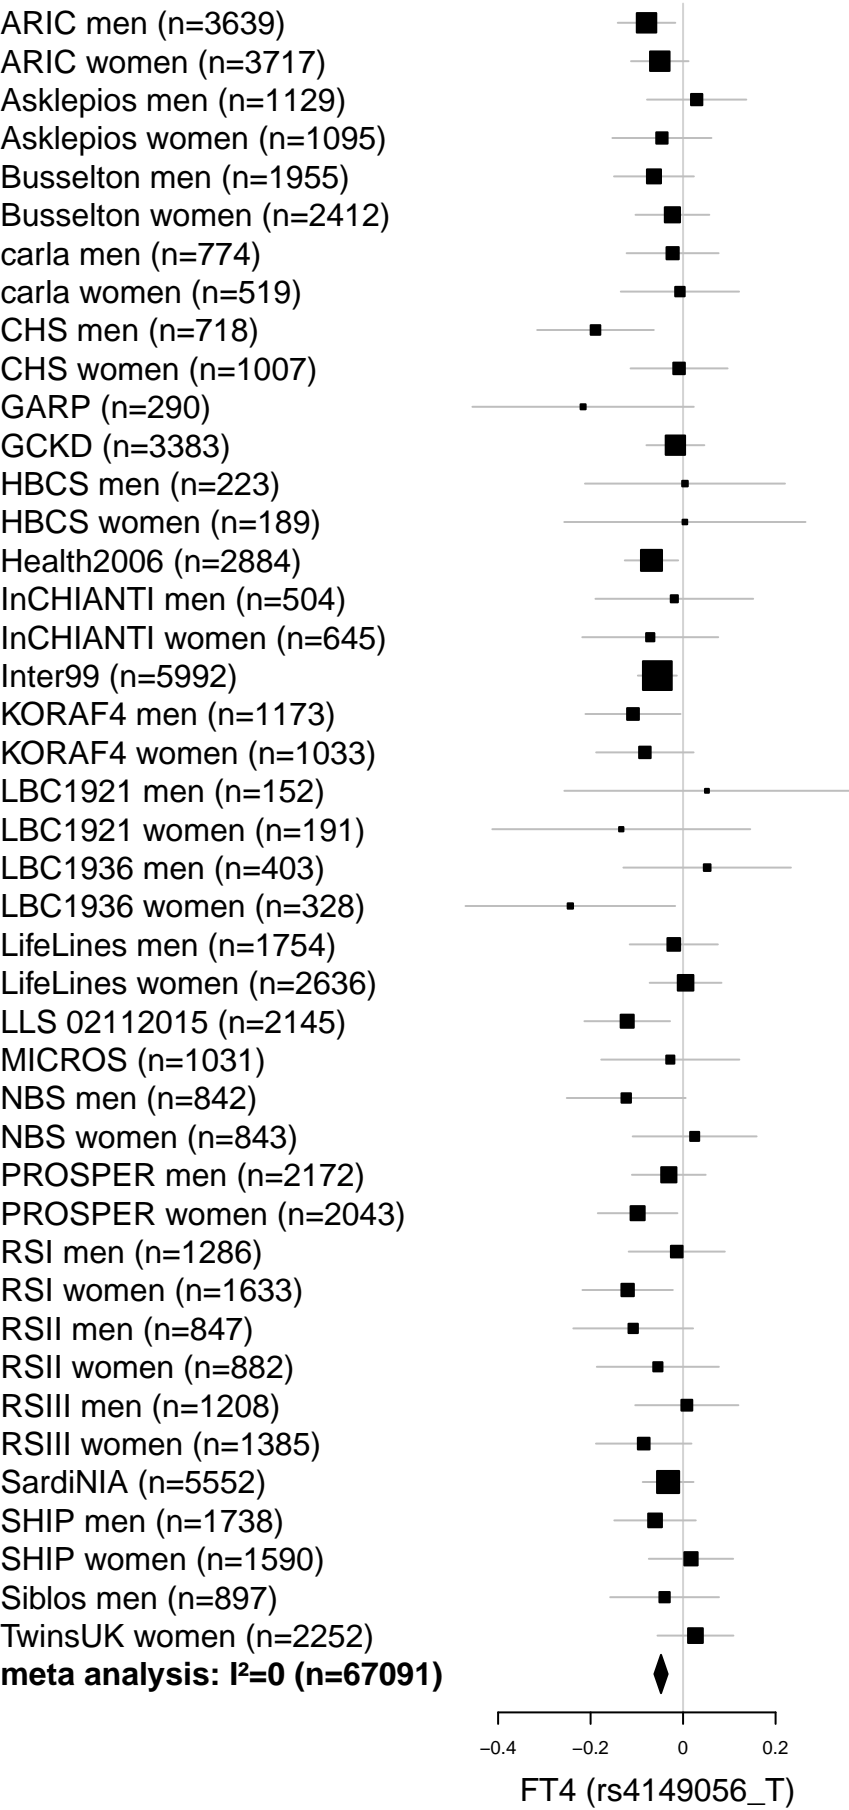

ARIC men (n=3639)  
ARIC women (n=3717)  
Busselton men (n=1955)  
Busselton women (n=2412)  
carla men (n=773)  
carla women (n=521)  
CHS men (n=718)  
CHS women (n=1007)  
GARP (n=290)  
GCKD (n=3383)  
HBCS men (n=223)  
HBCS women (n=189)  
Health2006 (n=2884)  
InCHIANTI men (n=504)  
InCHIANTI women (n=645)  
Inter99 (n=5992)  
KORAF4 men (n=1173)  
KORAF4 women (n=1033)  
LBC1921 men (n=152)  
LBC1921 women (n=191)  
LBC1936 men (n=403)  
LBC1936 women (n=328)  
LifeLines men (n=1754)  
LifeLines women (n=2636)  
LLS 02112015 (n=2145)  
MICROS (n=1031)  
NBS men (n=842)  
NBS women (n=843)  
PROSPER men (n=2172)  
PROSPER women (n=2043)  
RSI men (n=1286)  
RSI women (n=1633)  
RSII men (n=847)  
RSII women (n=882)  
RSIII men (n=1208)  
RSIII women (n=1385)  
SardiNIA (n=5552)  
SHIP men (n=1738)  
SHIP women (n=1590)  
TwinsUK women (n=2252)  
**meta analysis:  $I^2=0$  (n=63971)**

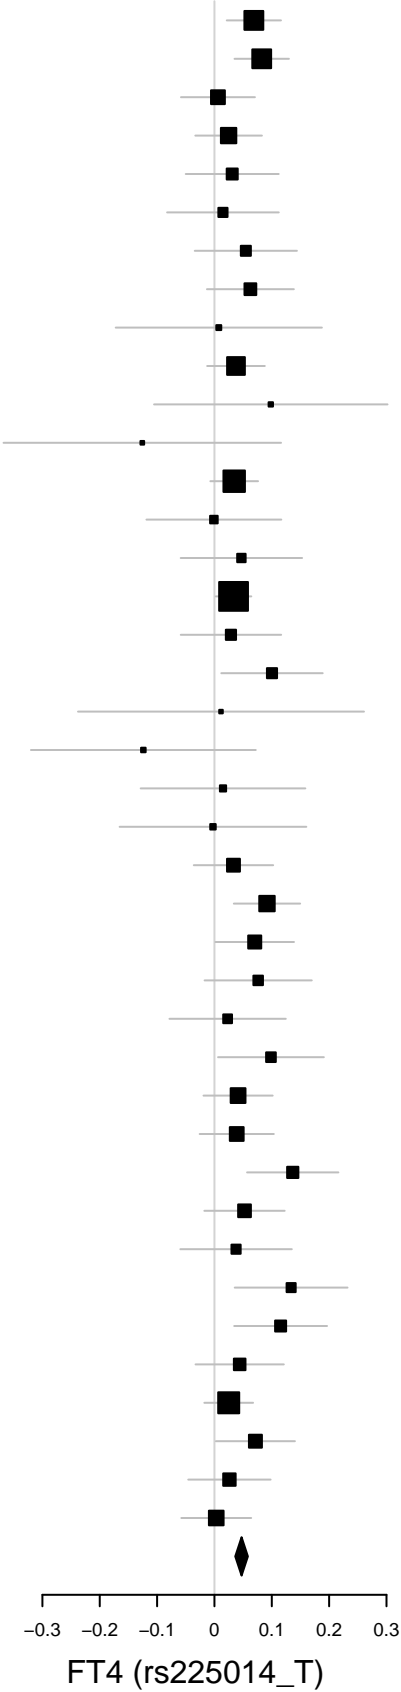

ARIC men (n=3639)  
 ARIC women (n=3717)  
 Busselton men (n=1955)  
 Busselton women (n=2412)  
 carla men (n=774)  
 carla women (n=520)  
 CHS men (n=718)  
 CHS women (n=1007)  
 GARP (n=290)  
 GCKD (n=3383)  
 HBCS men (n=223)  
 HBCS women (n=189)  
 InCHIANTI men (n=504)  
 InCHIANTI women (n=645)  
 KORAF4 men (n=1173)  
 KORAF4 women (n=1033)  
 LBC1921 men (n=152)  
 LBC1921 women (n=191)  
 LBC1936 men (n=403)  
 LBC1936 women (n=328)  
 LifeLines men (n=1754)  
 LifeLines women (n=2636)  
 LLS 02112015 (n=2145)  
 MICROS (n=1031)  
 NBS men (n=842)  
 NBS women (n=843)  
 PROSPER men (n=2172)  
 PROSPER women (n=2043)  
 RSI men (n=1286)  
 RSI women (n=1633)  
 RSII men (n=847)  
 RSII women (n=882)  
 RSIII men (n=1208)  
 RSIII women (n=1385)  
 SardiNIA (n=5552)  
 SHIP men (n=1738)  
 SHIP women (n=1590)  
 TwinsUK women (n=2252)  
**meta analysis:  $I^2=40.2$  (n=55095)**

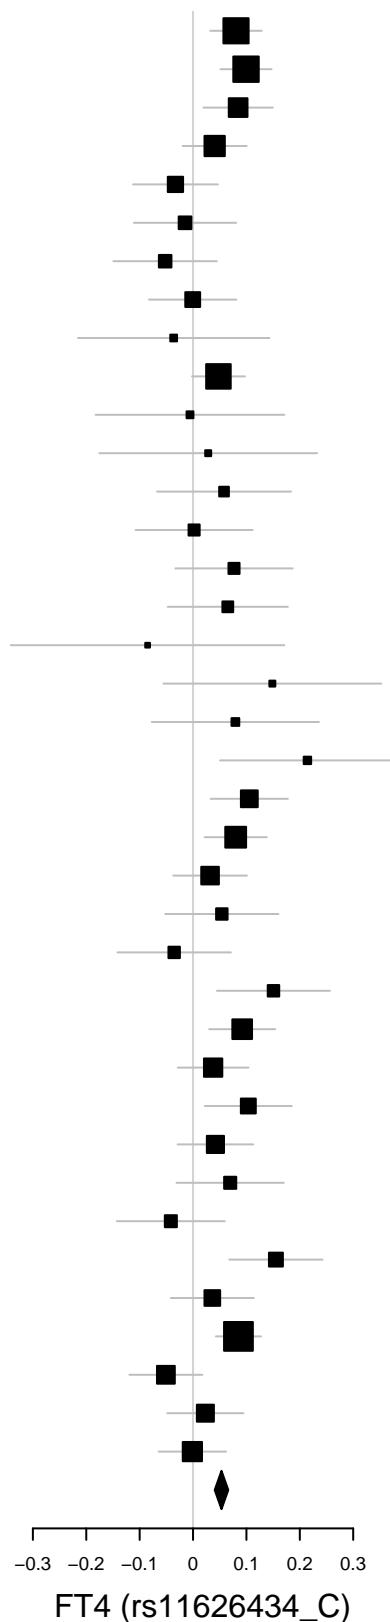

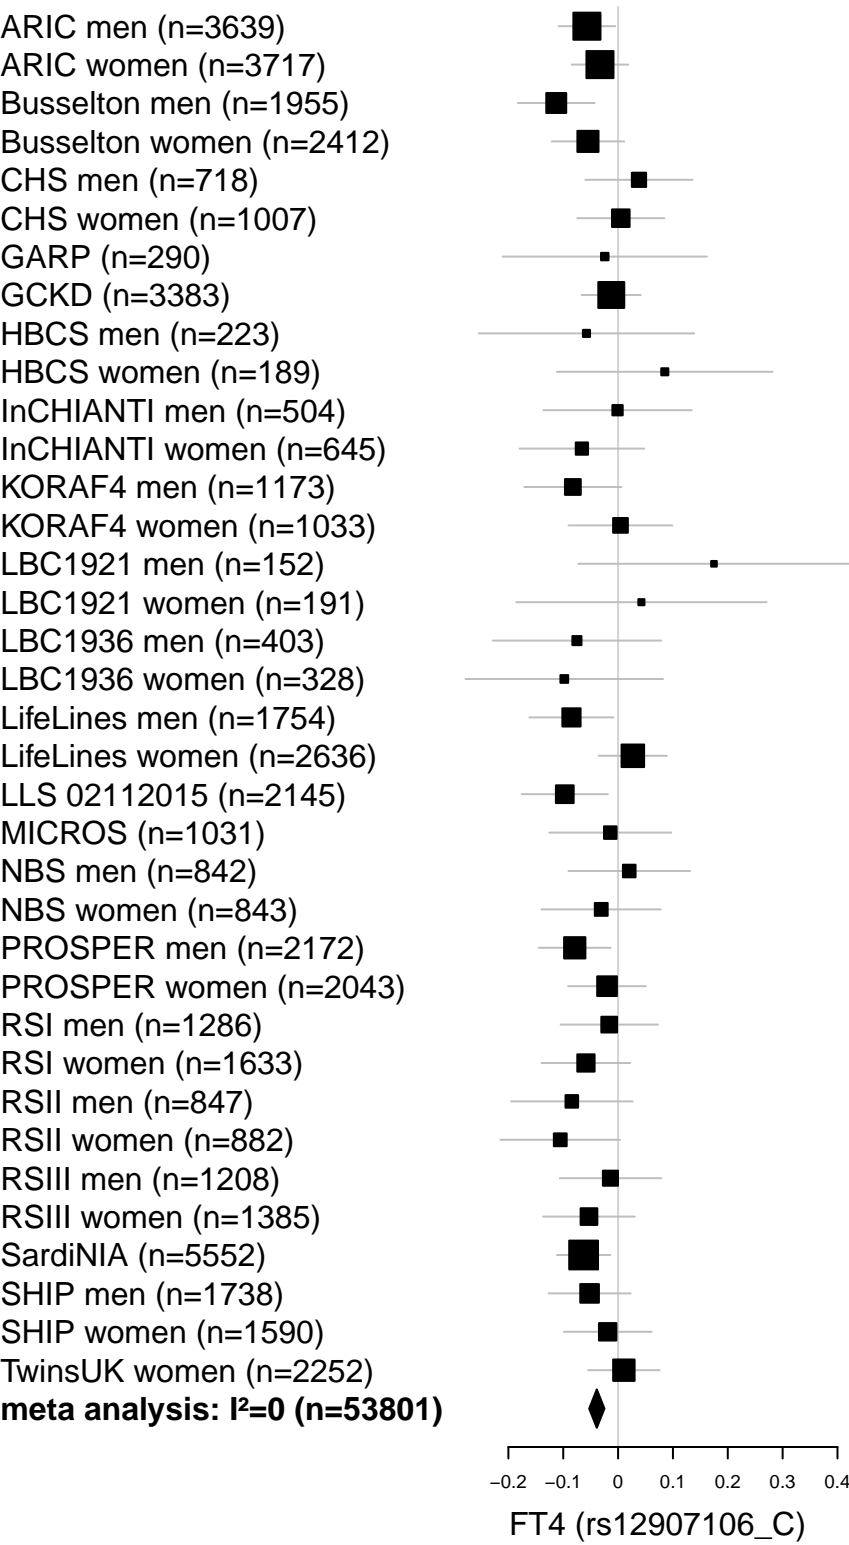

ARIC men (n=3639)  
ARIC women (n=3717)  
Busselton men (n=1955)  
Busselton women (n=2412)  
CHS men (n=718)  
CHS women (n=1007)  
GARP (n=290)  
GCKD (n=3383)  
HBCS men (n=223)  
HBCS women (n=189)  
InCHIANTI men (n=504)  
InCHIANTI women (n=645)  
KORAF4 men (n=1173)  
KORAF4 women (n=1033)  
LBC1921 men (n=152)  
LBC1921 women (n=191)  
LBC1936 men (n=403)  
LBC1936 women (n=328)  
LifeLines men (n=1754)  
LifeLines women (n=2636)  
LLS 02112015 (n=2145)  
MICROS (n=1031)  
NBS men (n=842)  
NBS women (n=843)  
PROSPER men (n=2172)  
PROSPER women (n=2043)  
RSI men (n=1286)  
RSI women (n=1633)  
RSII men (n=847)  
RSII women (n=882)  
RSIII men (n=1208)  
RSIII women (n=1385)  
SardiNIA (n=5552)  
SHIP men (n=1738)  
SHIP women (n=1590)  
TwinsUK women (n=2252)  
**meta analysis: I<sup>2</sup>=7.9 (n=53801)**

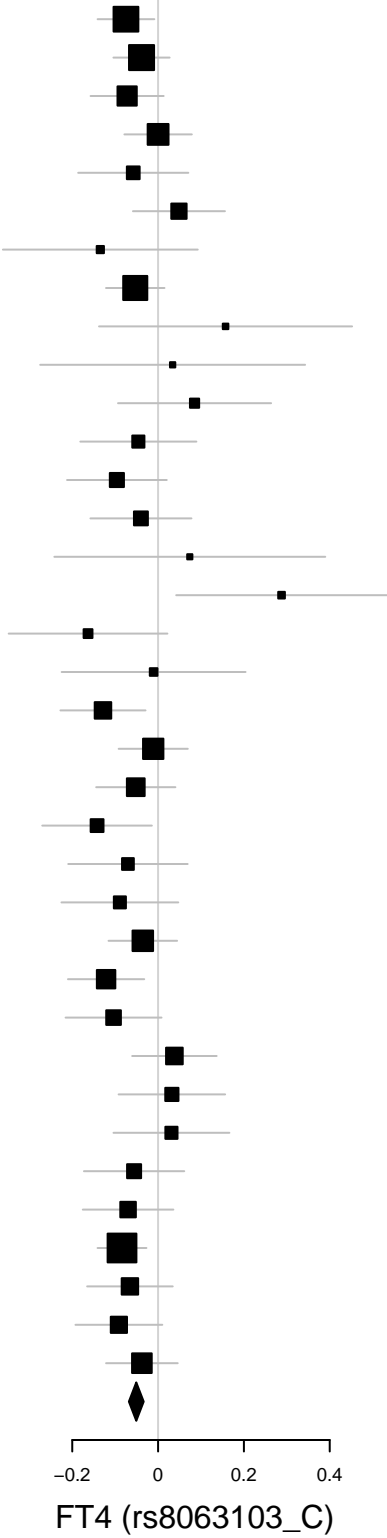



ARIC men (n=3639)  
 ARIC women (n=3717)  
 Busselton men (n=1955)  
 Busselton women (n=2412)  
 CHS men (n=718)  
 CHS women (n=1007)  
 GARP (n=290)  
 GCKD (n=3383)  
 HBCS men (n=223)  
 HBCS women (n=189)  
 Health2006 (n=2884)  
 InCHIANTI men (n=504)  
 InCHIANTI women (n=645)  
 Inter99 (n=5992)  
 KORAF4 men (n=1173)  
 KORAF4 women (n=1033)  
 LBC1921 men (n=152)  
 LBC1921 women (n=191)  
 LBC1936 men (n=403)  
 LBC1936 women (n=328)  
 LifeLines men (n=1754)  
 LifeLines women (n=2636)  
 LLS 02112015 (n=2145)  
 MICROS (n=1031)  
 NBS men (n=842)  
 NBS women (n=843)  
 PROSPER men (n=2172)  
 PROSPER women (n=2043)  
 RSI men (n=1286)  
 RSI women (n=1633)  
 RSII men (n=847)  
 RSII women (n=882)  
 RSIII men (n=1208)  
 RSIII women (n=1385)  
 SardiNIA (n=5552)  
 SHIP men (n=1738)  
 SHIP women (n=1590)  
 TwinsUK women (n=2252)  
**meta analysis:  $I^2=0$  (n=62677)**

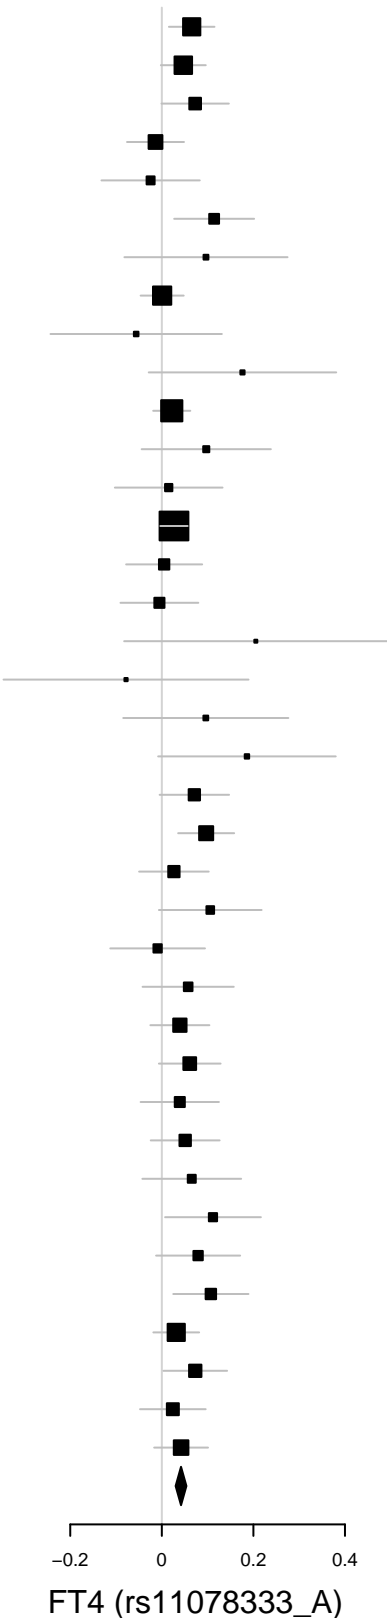

ARIC men (n=3639)  
 ARIC women (n=3717)  
 Asklepios men (n=1141)  
 Asklepios women (n=1102)  
 Busselton men (n=1955)  
 Busselton women (n=2412)  
 carla men (n=772)  
 carla women (n=520)  
 CHS men (n=718)  
 CHS women (n=1007)  
 GARP (n=290)  
 GCKD (n=3383)  
 HBCS men (n=223)  
 HBCS women (n=189)  
 Health2006 (n=2884)  
 InCHIANTI men (n=504)  
 InCHIANTI women (n=645)  
 Inter99 (n=5992)  
 KORAF4 men (n=1173)  
 KORAF4 women (n=1033)  
 LBC1921 men (n=152)  
 LBC1921 women (n=191)  
 LBC1936 men (n=403)  
 LBC1936 women (n=328)  
 LifeLines men (n=1754)  
 LifeLines women (n=2636)  
 LLS 02112015 (n=2145)  
 MICROS (n=1031)  
 NBS men (n=842)  
 NBS women (n=843)  
 PROSPER men (n=2172)  
 PROSPER women (n=2043)  
 RSI men (n=1286)  
 RSI women (n=1633)  
 RSII men (n=847)  
 RSII women (n=882)  
 RSIII men (n=1208)  
 RSIII women (n=1385)  
 SardiNIA (n=5552)  
 SHIP men (n=1738)  
 SHIP women (n=1590)  
 Siblos men (n=861)  
 TwinsUK women (n=2252)  
**meta analysis:  $I^2=0$  (n=67073)**

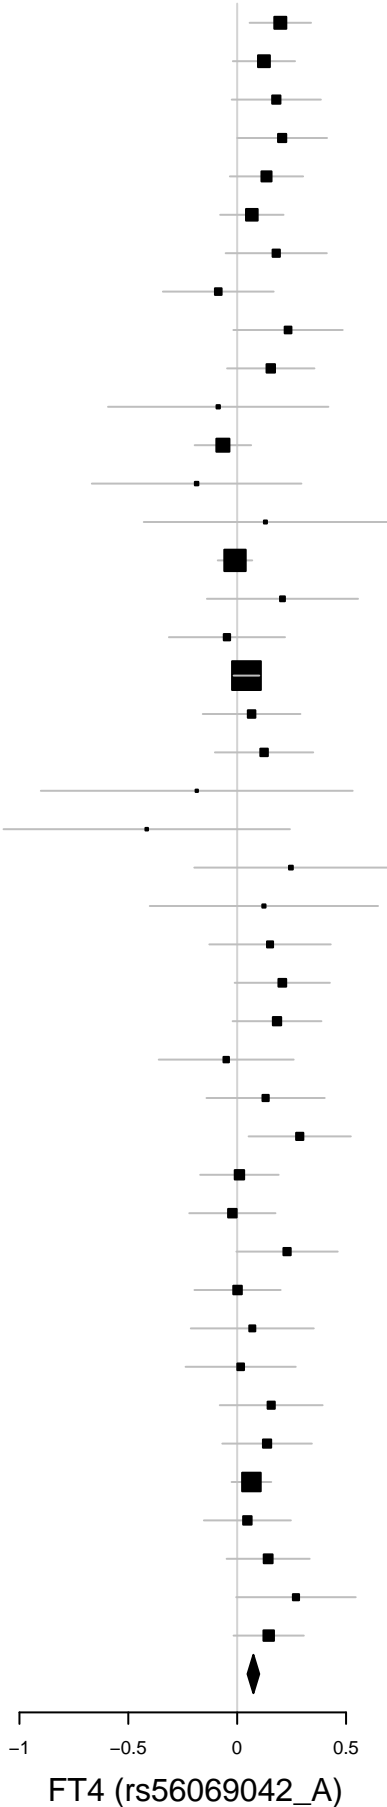

Forest plots of the 16 index SNPs of replicated susceptibility loci for FT4 in the combined discovery and replication samples. Effects and their 95% confidence intervals are based on inverse normalized FT4 values.  $I^2$  is the percentage of total variation across studies that is due to heterogeneity.

**Supplementary Figure 6: Manhattan plots for GWAS meta-analyses in the sex-stratified samples**

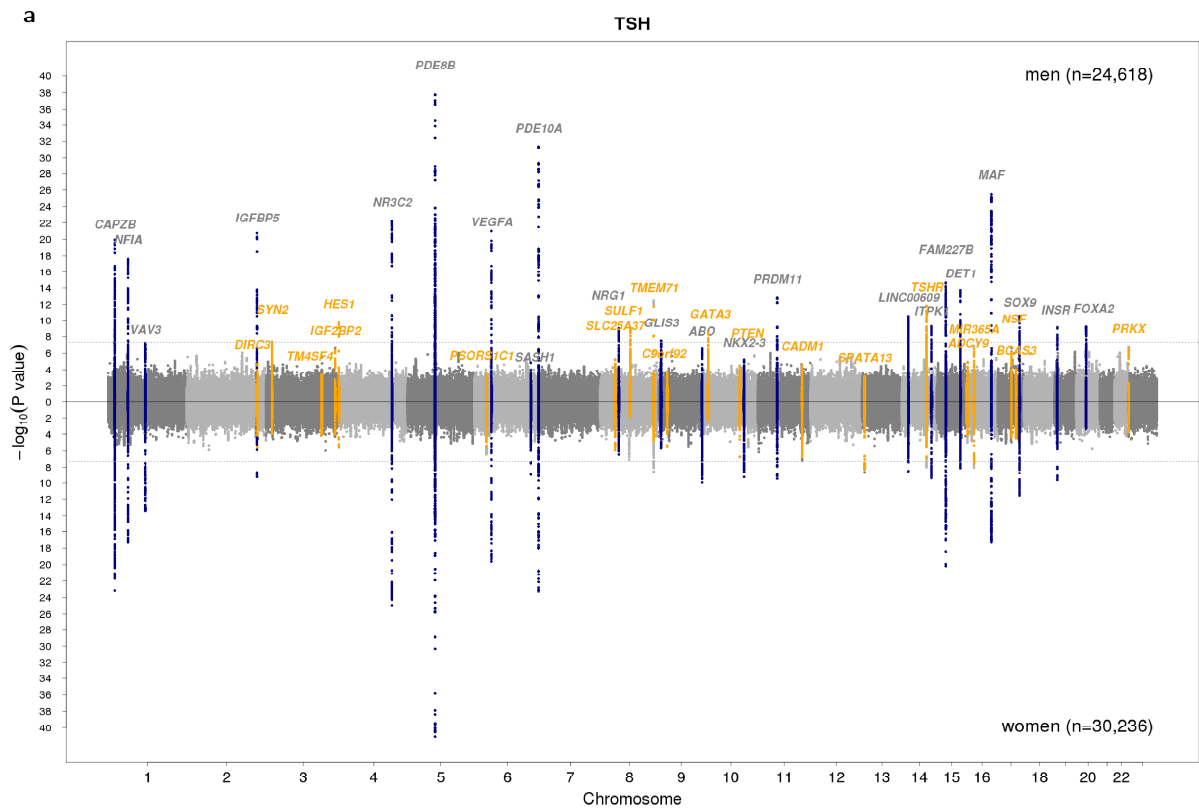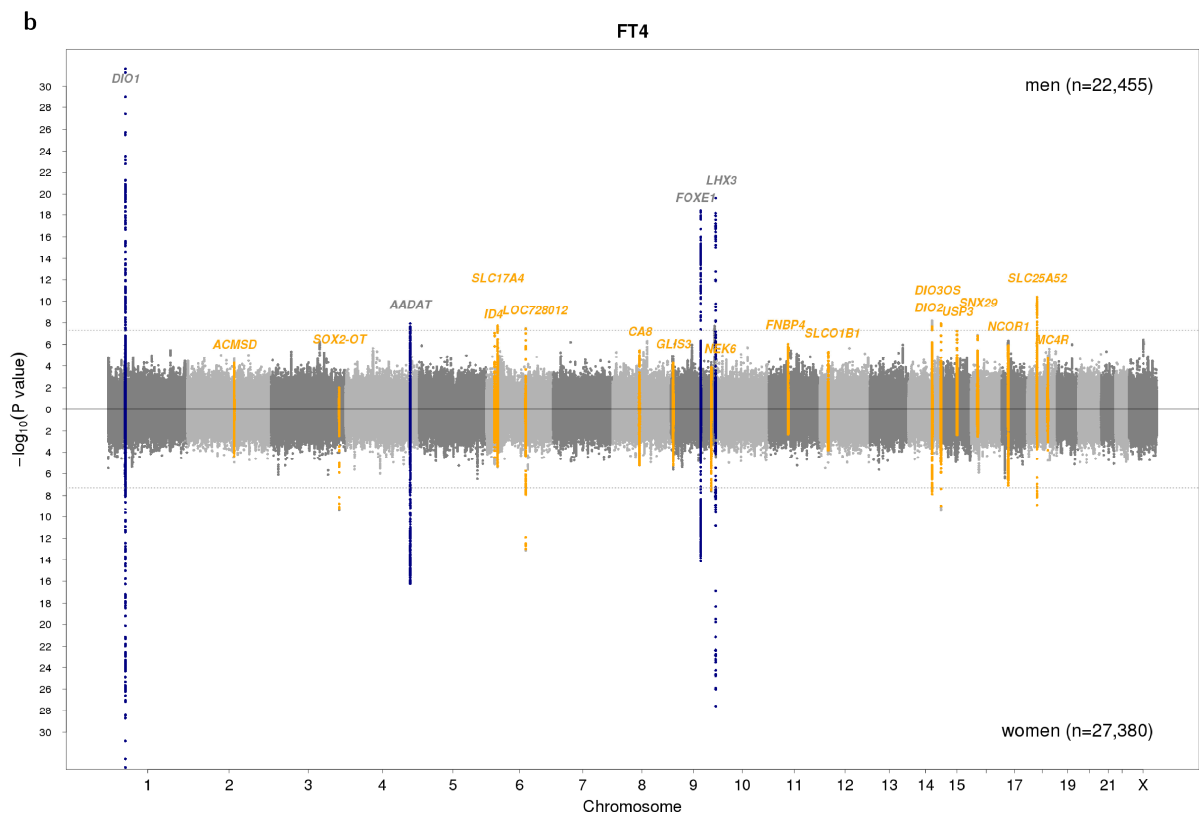

Manhattan plots of the GWAS meta-analysis results for (a) TSH and (b) FT4 contrasted for the men vs. women stratum. SNPs are plotted on the x-axis according to their position on each chromosome with the  $-\log_{10}(\text{p-value})$  of the association test on the y-axis. The upper solid horizontal line indicates the threshold for genome-wide significance,  $5 \times 10^{-8}$ . Genomic loci previously known to contain trait-associated variants are colored in blue, new findings in orange (based on the overall sample).

**Supplementary Figure 7: Genes related to abnormal thyroid morphology in genetically manipulated mice are enriched for SNPs significantly associated with TSH concentrations in humans**

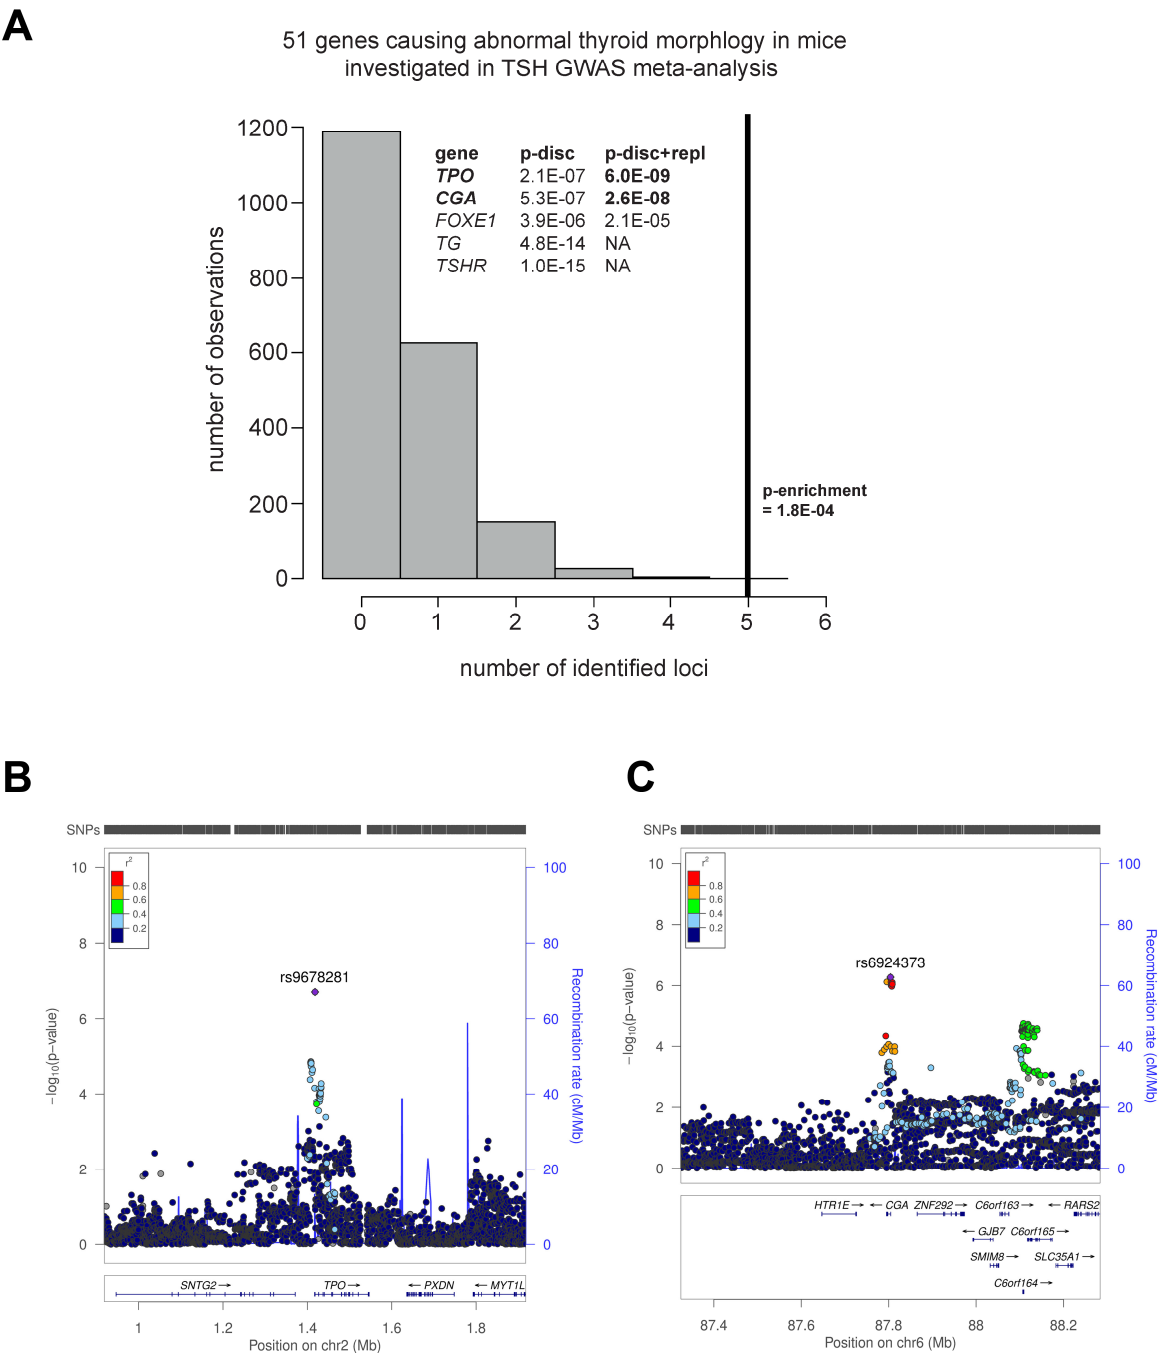

The line indicates the number of observed genes that contain significant SNPs in the TSH meta-analysis based on the human orthologs of 51 genes that cause abnormal thyroid morphology in mice. The histogram depicts the distribution of genes that contain significant SNPs in the TSH meta-analysis based on 2,000 randomly drawn lists of 51 genes. The inset shows the 5 genes that contained significantly associated SNPs in the TSH discovery meta-analysis (p-disc: association test p-value of the index SNP) as well as their evidence for replication in independent samples for SNPs (p-disc+repl: association test p-value in the combined discovery and replication sample) that did not achieve genome-wide significance in the GWAS (Panel A). Panels B and C show the regional association plots for the SNPs that reached genome-wide significance based on the candidate gene approach.

### Supplementary Figure 8: Manhattan plot for GWAS meta-analyses for hypo- vs. hyperthyroidism

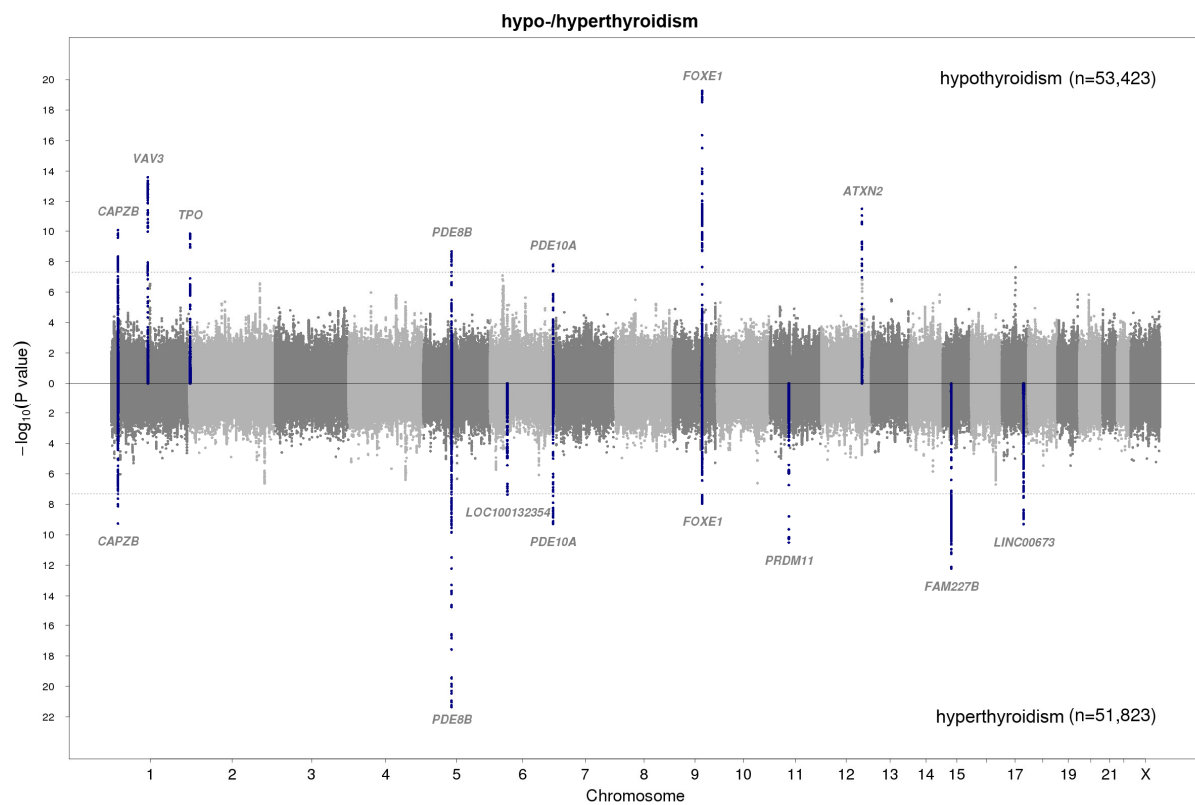

Manhattan plot of the GWAS meta-analysis results for hypo- and hyperthyroidism contrasted with each other. SNPs are plotted on the x-axis according to their position on each chromosome with the  $-\log_{10}(\text{p-value})$  of the association test on the y-axis. The upper solid horizontal line indicates the threshold for genome-wide significance,  $5 \times 10^{-8}$ . Genomic loci previously known to contain trait-associated variants are colored in blue.

Supplementary Figure 9: Thyroid hormone transport by MCT8 in comparison to hSLC17A4

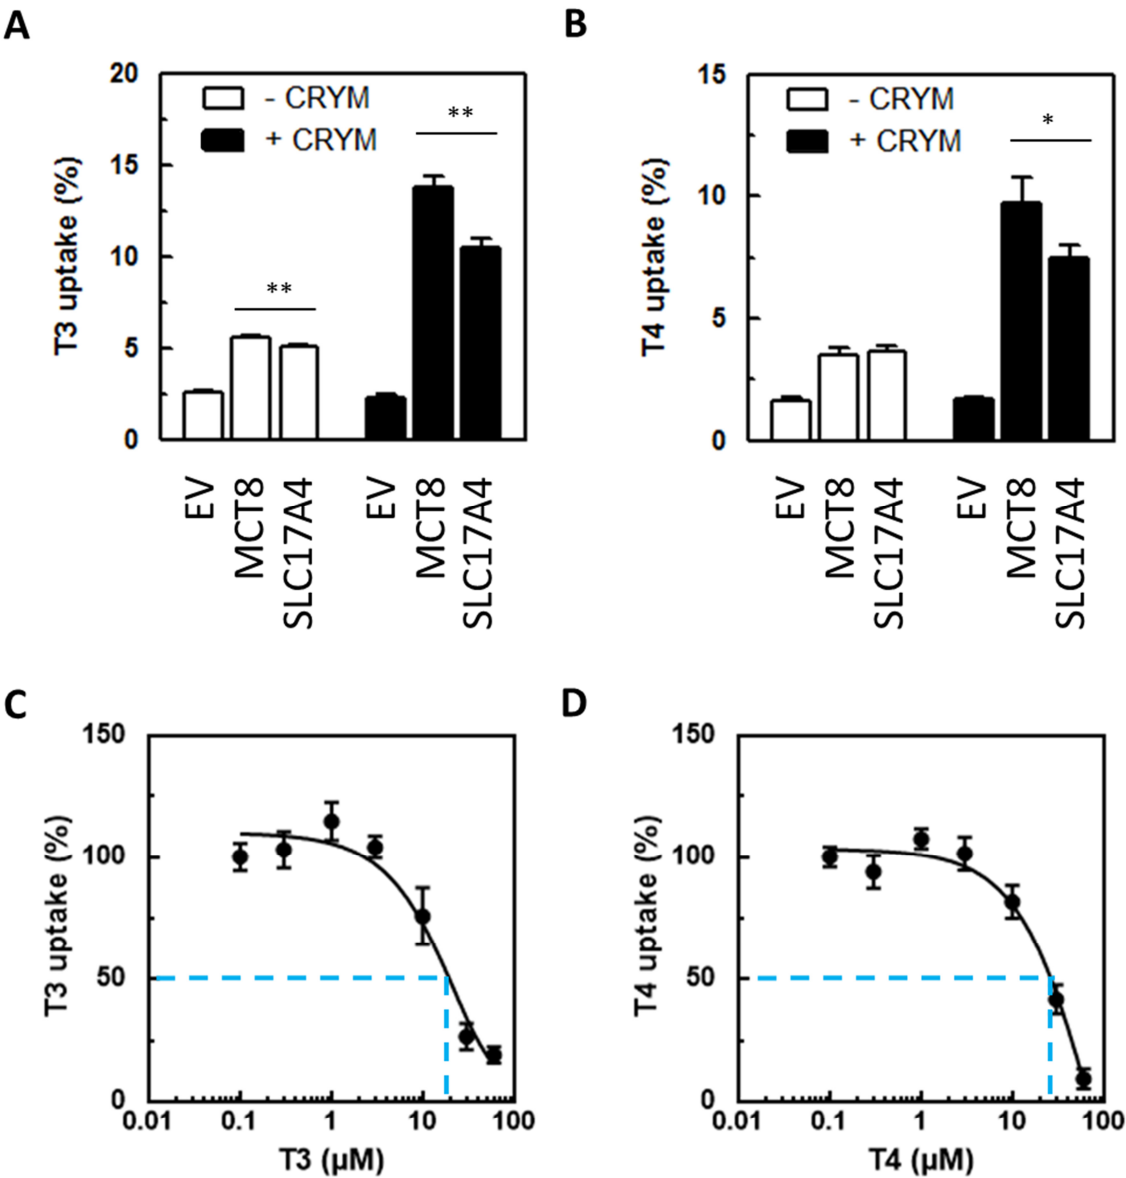

Cellular T3 (Panel A) and T4 (Panel B) accumulation in COS-1 cells, transiently transfected with empty vector (EV), wild-type hMCT8 or wild-type hSLC17A4 in the absence (white bars) or presence (black bars) of the intracellular thyroid hormone binding protein CRYM, after 10 minutes incubation at 37°C. All uptake levels are expressed relative to the amount of radio-labeled T3 or T4 added to the cells at the start of the incubation (1 nM (5x10E4 cpm) [<sup>125</sup>I]-T3 or [<sup>125</sup>I]-T4). All results are presented as means ± SEM (n=3). In the presence and absence of CRYM, T3 and T4 accumulation in MCT8 and hSLC17A4 transfected cells was significantly higher compared to empty vector control cells (one-way ANOVA with a Bonferroni corrected post hoc test, P<0.001). In the presence and absence of CRYM, T3 accumulation in hMCT8-transfected cells was slightly, but significantly, higher than in hSLC17A4-transfected cells; which was also the case for T4 uptake in the presence of CRYM. T3 (Panel C) and T4 (Panel D) saturation curves in COS-1 cells transiently transfected with hMCT8 in the absence of CRYM. All data points are corrected for background thyroid hormone uptake in control cells and presented relatively to the amount of internalized thyroid hormone in the presence of the lowest substrate concentration (0.1 μM for T3 and T4). Apparent IC<sub>50</sub> values were determined by standard second order polynomial regression analyses implemented in GraphPad Prism (La Jolla, USA). \* P<0.05; \*\* P<0.01.



**Supplementary Figure 10: QQ plots for all GWAS meta-analyses in the overall samples**

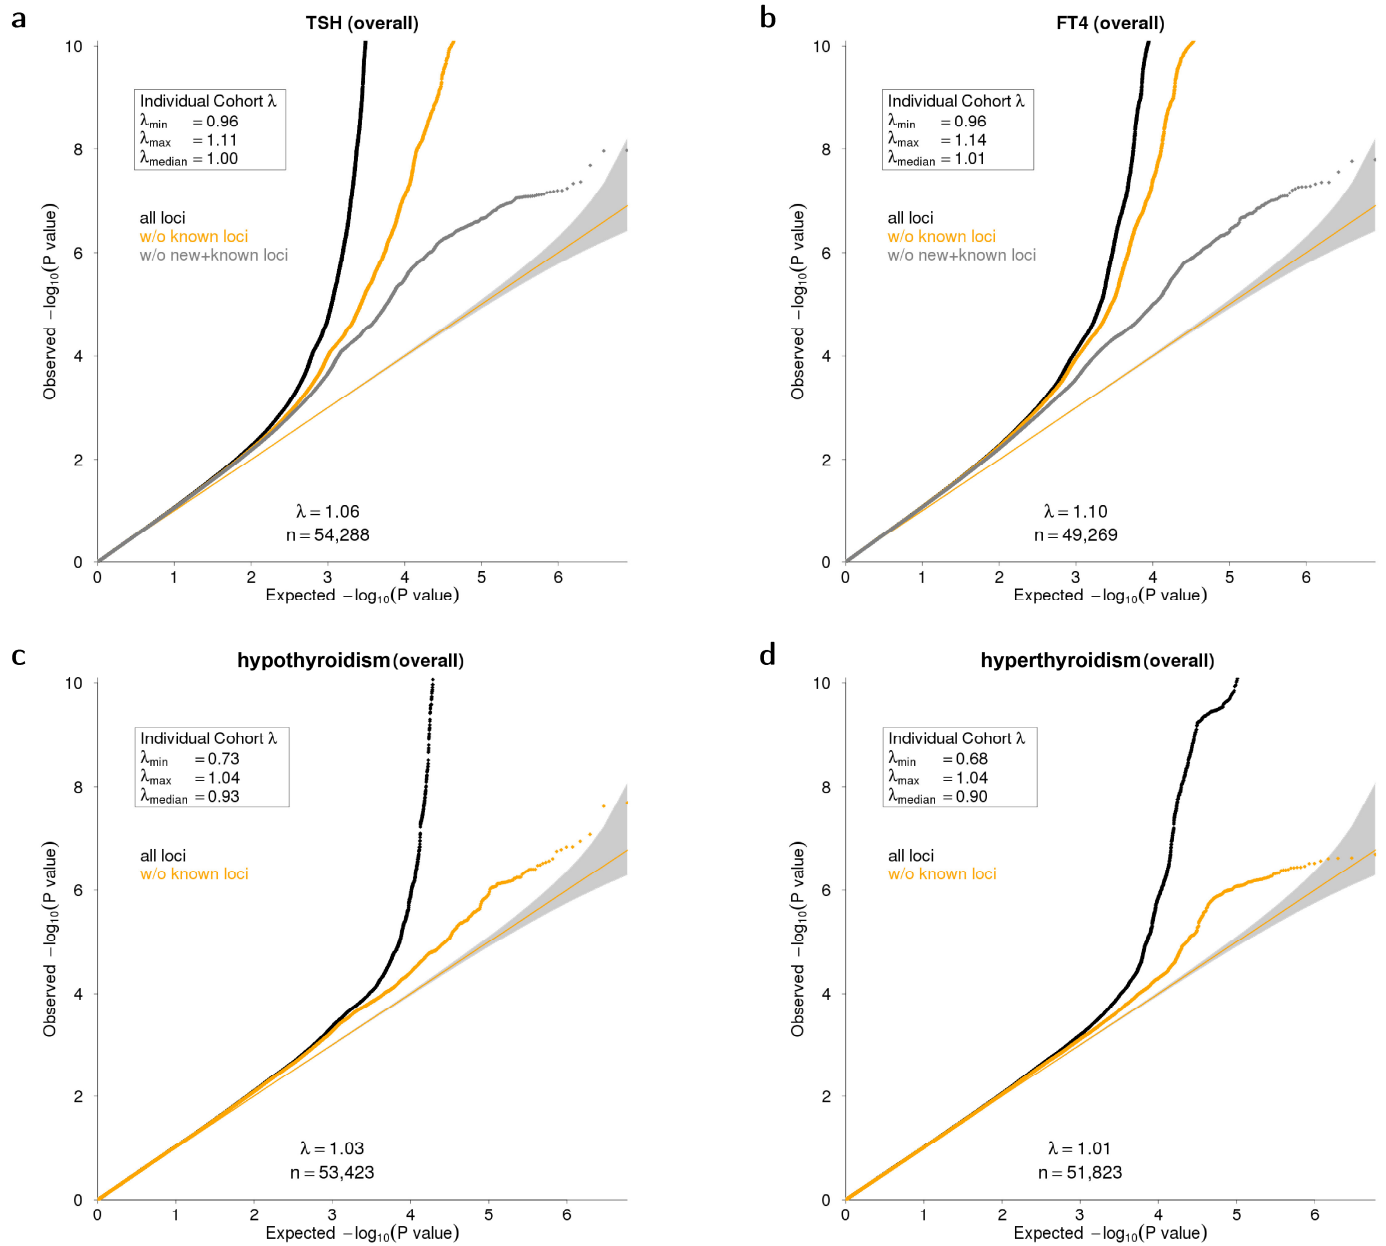

Quantile-quantile (QQ) plots of the GWAS meta-analysis results for (a) TSH, (b) FT4, (c) hypothyroidism, and (d) hyperthyroidism in the overall sample. The observed p-values of the association test are plotted on the y-axis against their expected distribution under the null hypothesis of no association on the x-axis. Results for all SNPs are shown in black, results after removal of loci previously known to contain trait-associated variants are shown in yellow, and results after removal of known and novel loci are shown in gray. Gray bands represent 95% confidence intervals.  $\lambda$ : lambda, genomic control parameter; n: sample size.

**Supplementary Figure 11: QQ plots for all GWAS meta-analyses in the sex-stratified samples**

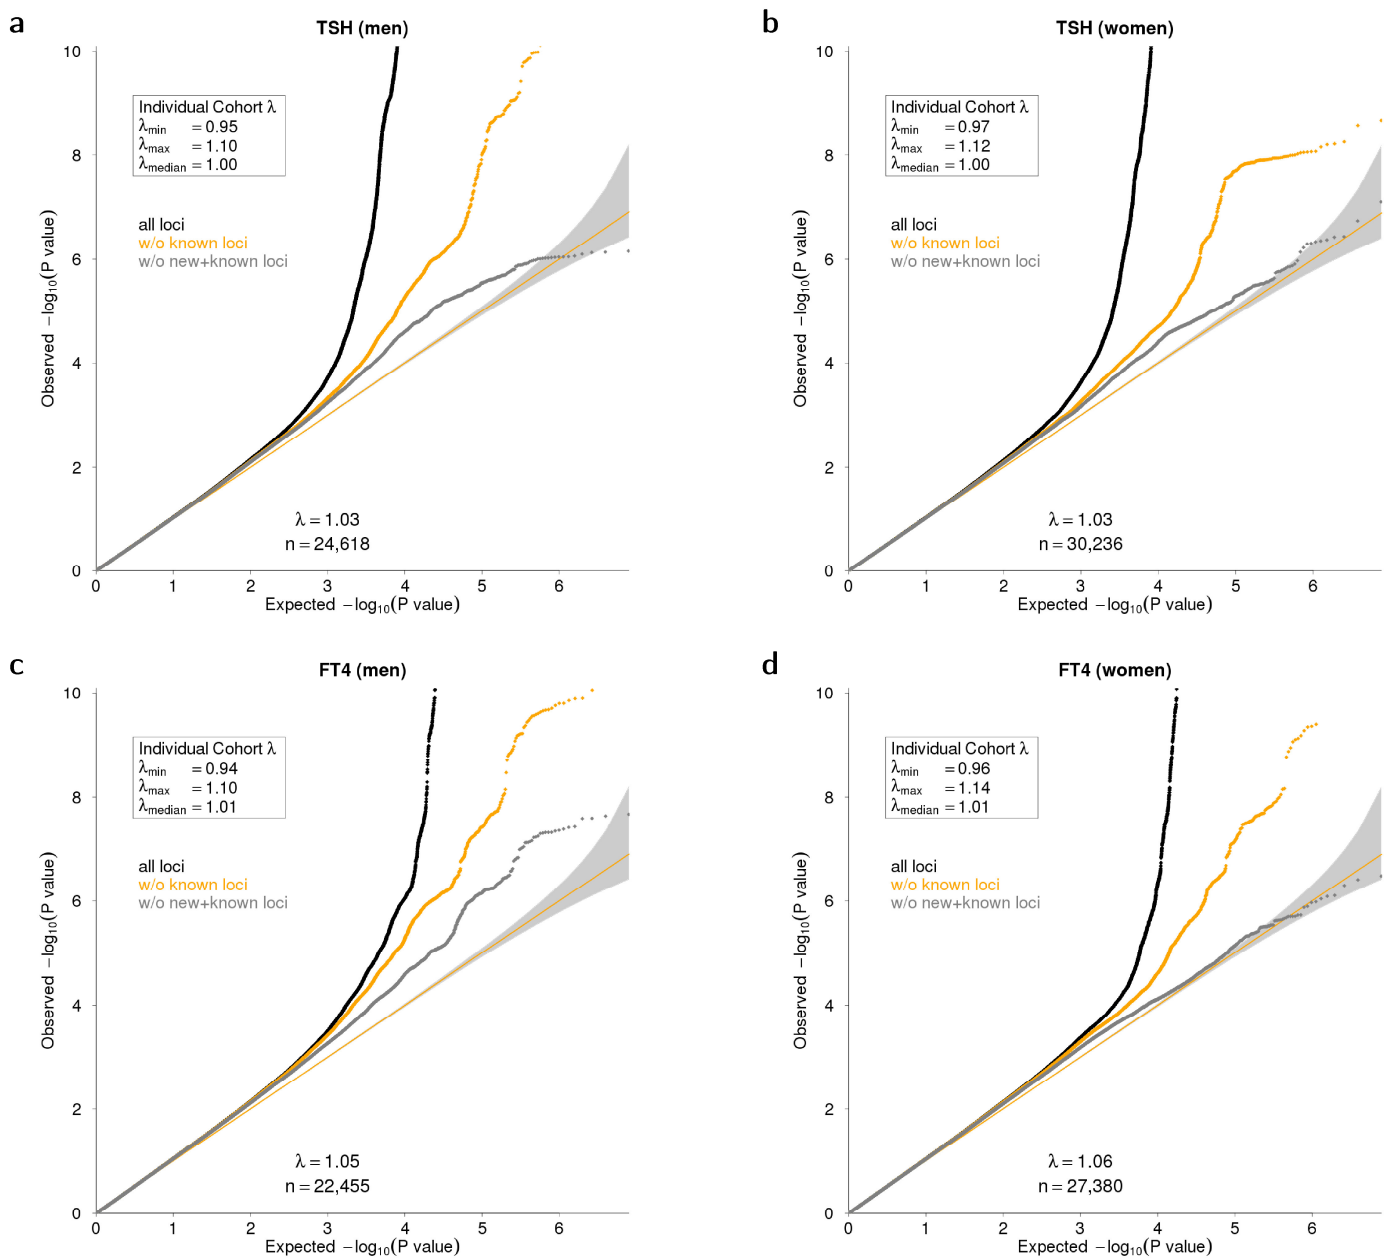

Quantile-quantile (QQ) plots of the GWAS meta-analysis results for TSH in the (a) men and (b) women, and for FT4 in the (c) men and (d) women stratum. The observed p-values of the association test are plotted on the y-axis against their expected distribution under the null hypothesis of no association on the x-axis. Results for all SNPs are shown in black, results after removal of loci previously known to contain trait-associated variants are shown in yellow, and results after removal of known and novel loci are shown in gray. Gray bands represent 95% confidence intervals.  $\lambda$ : lambda, genomic control parameter; n: sample size.

## Supplementary Figure 12: Results of pathway analyses

**A**

| Canonical Pathway                                                  | TSH      | FT4      | hyperthyroidism | hypothyroidism |
|--------------------------------------------------------------------|----------|----------|-----------------|----------------|
| G Protein Signaling Mediated by Tubby                              | 1.21E-05 |          | 3.79E-03        |                |
| Ephrin Receptor Signaling                                          | 1.30E-05 |          |                 |                |
| Cardiac Beta-adrenergic Signaling                                  | 3.26E-04 |          | 4.47E-03        |                |
| Protein Kinase A Signaling                                         | 3.33E-04 |          |                 |                |
| Relaxin Signaling                                                  | 3.49E-04 |          |                 |                |
| Thyronamine and Iodothyronamine Metabolism                         |          | 1.90E-05 |                 | 5.89E-03       |
| Thyroid Hormone Metabolism I (via Deiodination)                    |          | 1.90E-05 |                 | 5.89E-03       |
| Thyroid Hormone Biosynthesis                                       |          |          |                 | 5.89E-03       |
| TR/RXR Activation                                                  |          | 6.48E-05 |                 |                |
| 2-amino-3-carboxymuconate Semialdehyde Degradation to Glytaryl-CoA |          | 2.56E-03 |                 |                |
| Thyroid Hormone Metabolism II (via conjugation and/or degradation) |          | 3.58E-03 |                 |                |
| cAMP-mediated signaling                                            |          |          | 2.16E-03        |                |
| Gustation Pathway                                                  |          |          | 3.43E-03        |                |
| tRNA Splicing                                                      |          |          | 3.45E-03        | 2.16E-03       |
| T Cell Receptor Signaling                                          |          |          |                 | 9.17E-04       |

**B**

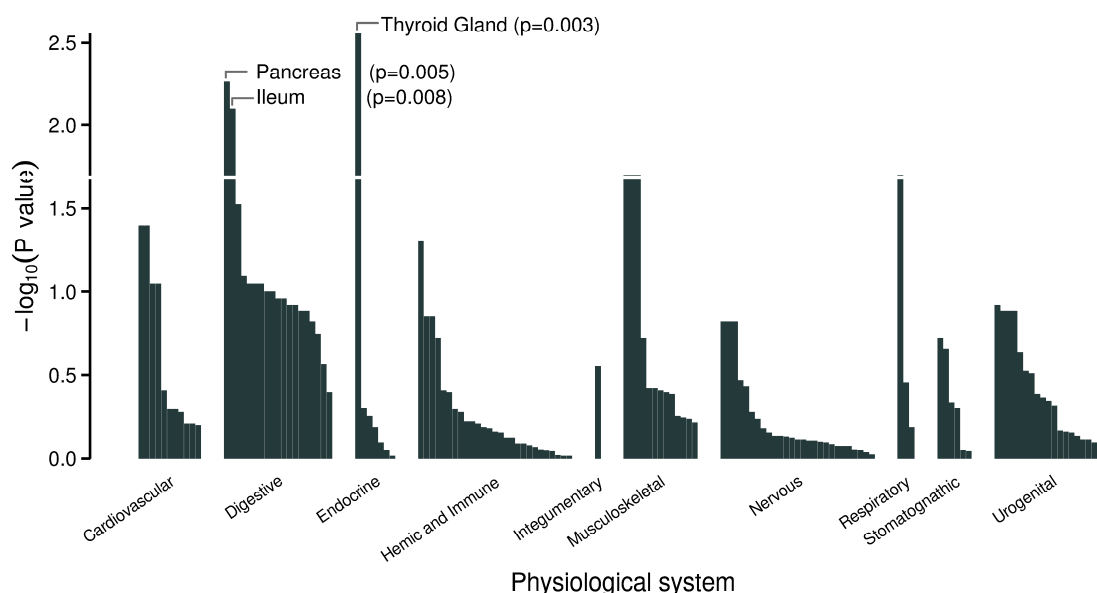

Panel A shows the top canonical pathways of the respective GWAS obtained by the IPA tool. The p-value for each pathway is calculated using a right-tailed Fisher Exact test. Tissue enrichment results based on the TSH GWAS (overall sample) obtained by the DEPICT software are shown in panel B. The nominal p-values <0.01 of the corresponding tissues are provided in the figure.

Supplementary Table 1: Genome-wide significant index SNPs for TSH after final stage

| SNP               | Chr | Position    | Locus              | A1 | A2 | AF1  | Effect | SE    | P        | I2   | N total | P GxSex | P hyperthyroidism | P hypothyroidism | P FT4          |
|-------------------|-----|-------------|--------------------|----|----|------|--------|-------|----------|------|---------|---------|-------------------|------------------|----------------|
| <b>known loci</b> |     |             |                    |    |    |      |        |       |          |      |         |         |                   |                  |                |
| rs12089835*       | 1   | 19,771,438  | CAPZB              | t  | c  | 0.35 | 0.073  | 0.007 | 1.3E-28  | 5.3  | 51018   | 0.734   | <b>7.7E-04</b>    | <b>1.5E-06</b>   | 0.015          |
| rs10917469        | 1   | 19,843,576  | CAPZB              | a  | g  | 0.84 | 0.111  | 0.009 | 4.0E-39  | 26.5 | 51018   | 0.793   | <b>1.0E-08</b>    | <b>1.9E-10</b>   | 0.001          |
| rs74804879*       | 1   | 19,862,320  | CAPZB              | t  | c  | 0.65 | 0.050  | 0.007 | 1.2E-14  | 5.3  | 51018   | 0.287   | <b>6.8E-04</b>    | <b>3.8E-04</b>   | 0.034          |
| rs334725          | 1   | 61,610,049  | NFIA               | a  | g  | 0.95 | 0.174  | 0.015 | 2.4E-32  | 39.2 | 51018   | 0.750   | <b>1.6E-04</b>    | <b>6.7E-05</b>   | <b>1.1E-04</b> |
| rs17020122        | 1   | 108,357,391 | VAV3               | t  | c  | 0.09 | 0.104  | 0.011 | 5.3E-20  | 11.6 | 51018   | 0.093   | 1.1E-01           | <b>6.4E-14</b>   | 0.142          |
| rs16856540*       | 2   | 217,580,413 | IGFBP5             | t  | c  | 0.84 | -0.055 | 0.008 | 7.8E-11  | 0.0  | 52047   | 0.805   | <b>6.8E-04</b>    | 8.0E-01          | 0.603          |
| rs13015993        | 2   | 217,625,523 | IGFBP5             | a  | g  | 0.73 | 0.082  | 0.007 | 4.5E-32  | 0.0  | 52047   | 0.034   | <b>3.5E-07</b>    | 5.4E-02          | 0.043          |
| rs1663070         | 3   | 12,239,852  | SYN2               | t  | c  | 0.74 | -0.046 | 0.007 | 3.5E-11  | 0.0  | 54288   | 0.243   | 1.3E-01           | 3.1E-03          | 0.889          |
| rs6535624*        | 4   | 149,587,905 | NR3C2              | a  | g  | 0.44 | 0.042  | 0.006 | 1.6E-11  | 0.0  | 52047   | 0.441   | 3.3E-03           | 2.8E-02          | 0.387          |
| rs11732089        | 4   | 149,665,602 | NR3C2              | t  | c  | 0.80 | 0.115  | 0.008 | 1.7E-51  | 8.4  | 52047   | 0.673   | <b>1.7E-06</b>    | <b>2.8E-05</b>   | 0.563          |
| rs62362610*       | 5   | 76,439,961  | PDE8B              | g  | c  | 0.08 | 0.073  | 0.012 | 7.7E-10  | 0.0  | 53074   | 0.205   | 1.3E-02           | 7.5E-02          | 0.156          |
| rs1119208*        | 5   | 76,488,613  | PDE8B              | t  | c  | 0.37 | 0.046  | 0.006 | 6.6E-13  | 13.6 | 53074   | 0.835   | <b>4.8E-05</b>    | 9.5E-01          | 0.150          |
| rs139424329*      | 5   | 76,495,539  | PDE8B              | a  | g  | 0.01 | -0.200 | 0.032 | 5.1E-10  | 0.0  | 45981   | 0.640   | 1.4E-02           | 5.5E-01          | 0.574          |
| rs2127387         | 5   | 76,532,571  | PDE8B              | a  | g  | 0.41 | 0.104  | 0.006 | 1.1E-117 | 25.0 | 53074   | 0.012   | <b>5.5E-22</b>    | <b>4.2E-09</b>   | <b>2.4E-06</b> |
| rs7702192*        | 5   | 76,554,807  | PDE8B              | a  | c  | 0.47 | 0.070  | 0.006 | 2.6E-30  | 0.0  | 53074   | 0.177   | <b>2.7E-07</b>    | 3.6E-03          | 6.1E-02        |
| rs113974964*      | 5   | 76,652,403  | PDE8B              | t  | c  | 0.05 | -0.124 | 0.015 | 2.1E-17  | 41.5 | 53074   | 0.656   | <b>4.2E-04</b>    | 2.7E-01          | 0.224          |
| rs139149784*      | 5   | 76,660,193  | PDE8B              | a  | g  | 0.03 | 0.156  | 0.029 | 5.0E-08  | 2.3  | 49018   | 0.552   | 1.0E-01           | 7.9E-03          | 0.979          |
| rs182873197*      | 5   | 76,773,148  | PDE8B              | t  | c  | 0.05 | -0.080 | 0.014 | 1.7E-08  | 14.4 | 53074   | 0.667   | 2.5E-01           | 1.9E-01          | 0.408          |
| rs744103          | 6   | 43,805,362  | VEGFA/LOC100132354 | a  | t  | 0.69 | 0.092  | 0.007 | 6.7E-41  | 40.9 | 54288   | 0.802   | <b>3.7E-05</b>    | <b>5.7E-05</b>   | <b>3.3E-05</b> |
| rs9381266*        | 6   | 43,905,037  | VEGFA/LOC100132354 | t  | c  | 0.74 | 0.073  | 0.007 | 1.8E-25  | 27.1 | 54288   | 0.390   | <b>1.5E-07</b>    | 3.3E-03          | 5.6E-03        |
| rs9497965         | 6   | 148,521,292 | SASH1              | t  | c  | 0.40 | 0.044  | 0.006 | 9.8E-13  | 21.9 | 54288   | 0.069   | 3.5E-01           | <b>1.6E-05</b>   | 0.327          |
| rs73022105*       | 6   | 165,973,757 | PDE10A             | t  | c  | 0.95 | 0.005  | 0.016 | 1.2E-11  | 0.0  | 52424   | 0.087   | 2.2E-02           | 2.4E-01          | 0.406          |
| rs1079418         | 6   | 166,047,034 | PDE10A             | a  | g  | 0.69 | 0.101  | 0.007 | 8.2E-53  | 20.9 | 52424   | 0.206   | <b>3.6E-09</b>    | <b>4.3E-08</b>   | 0.019          |
| rs2439301         | 8   | 32,433,013  | NRG1               | a  | g  | 0.23 | -0.059 | 0.008 | 8.2E-15  | 13.9 | 54288   | 0.177   | 7.9E-03           | 3.5E-02          | 0.308          |
| rs10814915        | 9   | 4,290,544   | GLIS3              | t  | c  | 0.44 | 0.042  | 0.006 | 5.1E-12  | 6.4  | 54288   | 0.547   | <b>3.2E-04</b>    | 2.5E-03          | <b>5.6E-05</b> |
| rs8176645         | 9   | 136,149,098 | ABO                | a  | t  | 0.34 | 0.052  | 0.006 | 3.9E-16  | 51.2 | 54288   | 0.383   | 2.1E-02           | <b>2.2E-04</b>   | 0.806          |
| rs200574439       | 10  | 101,283,330 | NKX2-3             | a  | c  | 0.58 | -0.047 | 0.006 | 3.7E-13  | 13.8 | 54288   | 0.311   | <b>3.2E-05</b>    | <b>1.4E-04</b>   | 0.007          |
| rs12284404        | 11  | 45,228,686  | PRDM11             | a  | g  | 0.27 | -0.067 | 0.007 | 2.5E-22  | 0.0  | 54288   | 0.250   | <b>6.0E-11</b>    | 9.5E-01          | 0.414          |
| rs398745          | 14  | 36,536,181  | MBIP               | a  | c  | 0.59 | -0.052 | 0.006 | 4.0E-17  | 0.0  | 54288   | 0.236   | 1.7E-03           | 2.2E-02          | <b>1.8E-04</b> |
| rs2254613*        | 14  | 36,713,154  | MBIP               | t  | g  | 0.55 | -0.035 | 0.006 | 3.4E-08  | 27.0 | 54288   | 0.754   | 2.4E-02           | 4.2E-01          | 0.008          |
| rs8015085         | 14  | 93,585,331  | ITPK1              | a  | g  | 0.21 | 0.067  | 0.008 | 2.4E-18  | 16.9 | 54288   | 0.875   | <b>3.5E-04</b>    | 4.5E-03          | <b>2.5E-05</b> |
| rs17477923        | 15  | 49,711,185  | FAM227B/FGF7       | t  | c  | 0.74 | 0.083  | 0.007 | 2.6E-33  | 40.3 | 54288   | 0.503   | <b>6.1E-13</b>    | 1.6E-02          | <b>1.2E-06</b> |
| rs11639111*       | 15  | 49,749,735  | FAM227B/FGF7       | t  | c  | 0.41 | 0.045  | 0.006 | 3.6E-13  | 11.0 | 54288   | 0.858   | 9.7E-04           | 1.3E-01          | 0.047          |
| rs13329353        | 15  | 89,113,877  | DET1               | t  | c  | 0.68 | 0.061  | 0.007 | 5.2E-21  | 19.2 | 54288   | 0.110   | 3.4E-03           | 7.9E-01          | <b>3.6E-06</b> |
| rs17767491        | 16  | 79,745,487  | MAF                | a  | g  | 0.68 | 0.088  | 0.007 | 3.4E-42  | 40.5 | 54288   | 0.069   | <b>7.0E-07</b>    | 5.6E-03          | 0.054          |
| rs1042673         | 17  | 70,121,339  | SOX9               | a  | g  | 0.52 | -0.055 | 0.006 | 3.6E-19  | 0.0  | 54288   | 0.563   | <b>3.2E-06</b>    | 8.7E-01          | 0.672          |
| rs963384*         | 17  | 70,369,758  | SOX9               | t  | c  | 0.46 | 0.035  | 0.006 | 2.8E-08  | 0.0  | 54288   | 0.370   | <b>2.7E-08</b>    | 2.5E-01          | 0.643          |
| rs4804413         | 19  | 7,222,655   | INSR               | t  | c  | 0.44 | 0.053  | 0.006 | 8.6E-18  | 0.6  | 51942   | 0.865   | 9.7E-03           | 1.8E-03          | 0.030          |
| rs1203944         | 20  | 22,596,879  | FOXA2              | t  | c  | 0.23 | -0.051 | 0.007 | 2.4E-12  | 0.0  | 54288   | 0.040   | 3.8E-02           | <b>6.2E-05</b>   | 0.145          |
| <b>novel loci</b> |     |             |                    |    |    |      |        |       |          |      |         |         |                   |                  |                |
| rs6724073         | 2   | 218,236,786 | DIRC3              | t  | c  | 0.74 | 0.051  | 0.008 | 1.3E-10  | 6.8  | 52047   | 0.690   | 1.1E-01           | 6.3E-02          | 0.005          |
| rs28502438        | 3   | 149,220,109 | TM4SF4             | t  | c  | 0.57 | 0.034  | 0.006 | 3.7E-08  | 0.0  | 54288   | 0.803   | 7.6E-01           | 7.2E-02          | 0.183          |
| rs13100823        | 3   | 185,514,088 | IGF2BP2            | t  | c  | 0.31 | -0.041 | 0.007 | 6.8E-10  | 9.5  | 54288   | 0.367   | 8.5E-04           | <b>1.7E-04</b>   | 0.003          |
| rs59381142        | 3   | 193,916,181 | HES1               | a  | g  | 0.24 | -0.058 | 0.008 | 1.7E-14  | 0.0  | 52048   | 0.225   | 1.8E-03           | 2.4E-02          | 0.353          |
| rs1265091         | 6   | 31,108,129  | PSORS1C1           | t  | c  | 0.20 | 0.057  | 0.009 | 3.2E-11  | 38.5 | 47651   | 0.483   | 3.0E-01           | 3.0E-02          | 0.047          |
| rs56009477        | 8   | 23,356,964  | SLC25A37           | a  | g  | 0.84 | 0.052  | 0.008 | 3.7E-10  | 0.0  | 54288   | 0.869   | 9.2E-03           | 3.5E-02          | 0.085          |
| rs10957494        | 8   | 70,365,025  | SULF1              | a  | g  | 0.69 | -0.040 | 0.007 | 1.1E-09  | 24.1 | 54288   | 0.008   | 3.5E-02           | 2.5E-01          | 0.221          |
| rs118039499       | 8   | 133,771,635 | TG                 | a  | c  | 0.98 | 0.184  | 0.024 | 2.0E-14  | 37.8 | 48736   | 0.065   | <b>1.8E-12</b>    | 4.0E-01          | 0.401          |
| rs2739067*        | 8   | 133,951,991 | TG                 | a  | g  | 0.60 | -0.042 | 0.006 | 2.4E-11  | 0.0  | 54288   | 0.125   | 1.2E-01           | 1.3E-01          | 0.026          |
| rs9298749         | 9   | 16,214,340  | C9orf92            | a  | c  | 0.59 | -0.039 | 0.006 | 8.8E-10  | 16.7 | 54288   | 0.524   | 9.0E-01           | 6.9E-03          | 0.039          |
| rs11255790        | 10  | 8,682,180   | GATA3              | t  | c  | 0.30 | -0.041 | 0.007 | 6.8E-10  | 0.0  | 54288   | 0.016   | 1.3E-02           | 7.9E-01          | 0.358          |
| rs4933466         | 10  | 89,849,519  | PTEN               | a  | g  | 0.60 | 0.040  | 0.006 | 5.1E-10  | 28.6 | 54288   | 0.557   | 2.6E-01           | 6.6E-03          | 0.028          |
| rs4445669         | 11  | 115,045,237 | CADM1              | t  | c  | 0.46 | -0.040 | 0.006 | 5.8E-11  | 0.0  | 54288   | 0.600   | 5.1E-02           | 9.4E-02          | 0.158          |
| rs7329958         | 13  | 24,782,080  | SPATA13            | t  | c  | 0.35 | -0.044 | 0.007 | 1.1E-11  | 0.0  | 54288   | 0.138   | 6.1E-01           | 4.5E-03          | 0.137          |
| rs11159482*       | 14  | 81,490,842  | TSHR               | t  | c  | 0.09 | 0.085  | 0.013 | 6.3E-11  | 0.0  | 54288   | 0.397   | 1.9E-01           | <b>1.8E-04</b>   | 0.210          |
| rs59334515*       | 14  | 81,594,143  | TSHR               | t  | c  | 0.22 | -0.054 | 0.007 | 1.1E-13  | 25.7 | 54288   | 0.697   | 1.4E-02           | 3.1E-03          | 0.082          |
| rs12893151        | 14  | 81,619,945  | TSHR               | a  | c  | 0.22 | -0.062 | 0.008 | 1.0E-15  | 28.2 | 54288   | 0.124   | <b>3.2E-04</b>    | <b>1.9E-04</b>   | 0.931          |
| rs1045476         | 16  | 4,015,313   | ADCY9              | a  | g  | 0.18 | 0.049  | 0.008 | 2.4E-09  | 0.0  | 54288   | 0.660   | 1.7E-01           | 4.6E-03          | 0.745          |
| rs30227           | 16  | 14,405,428  | MIR365A            | t  | c  | 0.61 | -0.047 | 0.006 | 7.6E-14  | 11.1 | 54288   | 0.955   | 2.6E-02           | 1.1E-01          | 0.087          |
| rs77819282        | 17  | 44,762,589  | NSF                | a  | g  | 0.24 | 0.045  | 0.007 | 1.1E-09  | 0.0  | 54288   | 0.419   | 5.2E-01           | 7.1E-03          | 0.715          |
| rs1157994         | 17  | 59,338,574  | BCAS3              | a  | g  | 0.05 | -0.090 | 0.016 | 5.3E-09  | 25.4 | 50232   | 0.990   | 1.8E-01           | 4.1E-01          | 0.003          |
| rs12390237        | X   | 3,612,081   | PRKX               | a  | g  | 0.62 | -0.046 | 0.007 | 1.7E-11  | 0.0  | 36501   | 0.894   | 1.0E-02           | 6.6E-01          | 0.705          |

Effects, standard errors (SE), p-values (P) and N total are provided for the discovery stage. (\*) additional independent hits of a locus. A1: effect allele; AF1: allele frequency of A1; I2: percentage of total variation across studies that is due to heterogeneity; P GxSex: p-values of gene-by-sex interaction. Bold values of the increased and decreased TSH p-values indicate significance after Bonferroni correction for the 61 independent TSH-associated SNPs tested ( $p < 8.2E-4$ ). Bold values of the FT4 p-values indicate significance after Bonferroni correction for the 91 independent FT4+TSH SNPs tested ( $p < 5.5E-4$ ).

Supplementary Table 2: Genome-wide significant index SNPs for FT4 after final stage

| SNP               | Chr | Position    | Locus            | A1 | A2 | AF1  | Effect | SE    | P        | I2   | N total | P GxSex | P TSH          |
|-------------------|-----|-------------|------------------|----|----|------|--------|-------|----------|------|---------|---------|----------------|
| <b>known loci</b> |     |             |                  |    |    |      |        |       |          |      |         |         |                |
| rs145019385*      | 1   | 54,252,139  | <i>DIO1</i>      | t  | c  | 0.98 | 0.181  | 0.032 | 1.1E-08  | 0.0  | 42463   | 0.799   | 0.708          |
| rs12033572*       | 1   | 54,369,674  | <i>DIO1</i>      | c  | g  | 0.05 | 0.115  | 0.017 | 1.4E-11  | 0.0  | 49269   | 0.371   | 0.377          |
| rs2235544         | 1   | 54,375,570  | <i>DIO1</i>      | a  | c  | 0.52 | 0.139  | 0.007 | 4.2E-101 | 0.0  | 49269   | 0.950   | 0.062          |
| rs954878*         | 1   | 54,578,401  | <i>DIO1</i>      | a  | g  | 0.45 | -0.058 | 0.007 | 4.8E-19  | 0.0  | 49269   | 0.468   | 0.799          |
| rs6854291         | 4   | 170,992,760 | <i>AADAT</i>     | a  | g  | 0.10 | 0.117  | 0.011 | 1.3E-24  | 4.5  | 47314   | 0.257   | 0.030          |
| rs10739496        | 9   | 100,552,559 | <i>FOXE1</i>     | t  | c  | 0.66 | 0.078  | 0.007 | 4.2E-30  | 20.1 | 49269   | 0.181   | <b>4.8E-07</b> |
| rs10984606*       | 9   | 100,739,117 | <i>FOXE1</i>     | t  | g  | 0.50 | -0.040 | 0.007 | 1.2E-09  | 0.0  | 49269   | 0.405   | 0.030          |
| rs4842131         | 9   | 139,092,679 | <i>LHX3</i>      | t  | c  | 0.45 | -0.104 | 0.008 | 7.7E-44  | 4.4  | 44811   | 0.285   | 0.315          |
| rs55679545*       | 9   | 139,122,363 | <i>LHX3</i>      | a  | g  | 0.27 | 0.044  | 0.008 | 8.4E-09  | 0.0  | 49269   | 0.428   | 0.321          |
| rs1080094*        | 18  | 29,173,795  | <i>SLC25A52</i>  | a  | g  | 0.60 | -0.042 | 0.007 | 4.1E-10  | 14.5 | 49269   | 0.008   | 0.272          |
| rs113107469       | 18  | 29,306,737  | <i>SLC25A52</i>  | t  | c  | 0.03 | 0.200  | 0.022 | 1.0E-19  | 34.3 | 49269   | 0.431   | 0.510          |
| <b>novel loci</b> |     |             |                  |    |    |      |        |       |          |      |         |         |                |
| rs4954192         | 2   | 135,632,981 | <i>ACMSD</i>     | t  | c  | 0.43 | -0.041 | 0.007 | 8.4E-09  | 0.0  | 44902   | 0.826   | 0.333          |
| rs6785807         | 3   | 181,718,601 | <i>SOX2-OT</i>   | a  | g  | 0.15 | -0.059 | 0.009 | 2.5E-10  | 14.4 | 49269   | 0.026   | 0.297          |
| rs10946313        | 6   | 19,381,386  | <i>ID4</i>       | t  | c  | 0.63 | 0.046  | 0.007 | 2.3E-11  | 0.0  | 49269   | 0.243   | 0.002          |
| rs9356988         | 6   | 25,777,481  | <i>SLC17A4</i>   | a  | g  | 0.27 | -0.051 | 0.007 | 3.6E-12  | 0.0  | 49269   | 0.273   | 0.802          |
| rs137964359*      | 6   | 26,001,742  | <i>SLC17A4</i>   | t  | c  | 0.99 | -0.200 | 0.032 | 2.1E-10  | 0.0  | 49269   | 0.175   | 0.335          |
| rs17185536        | 6   | 100,620,931 | <i>LOC728012</i> | t  | c  | 0.24 | 0.073  | 0.008 | 1.9E-19  | 0.0  | 49269   | 0.368   | 0.707          |
| rs67583169        | 8   | 61,212,179  | <i>CA8</i>       | c  | g  | 0.87 | 0.061  | 0.010 | 1.0E-10  | 0.0  | 49269   | 0.718   | 0.169          |
| rs10119187        | 9   | 4,223,660   | <i>GLIS3</i>     | t  | c  | 0.81 | 0.050  | 0.009 | 4.1E-09  | 15.9 | 49269   | 0.933   | <b>2.2E-06</b> |
| rs10818937        | 9   | 127,015,440 | <i>NEK6</i>      | t  | c  | 0.31 | -0.048 | 0.007 | 1.3E-11  | 0.0  | 49269   | 0.388   | 6.3E-04        |
| rs11039355        | 11  | 47,737,501  | <i>FNBP4</i>     | t  | c  | 0.34 | -0.039 | 0.007 | 3.5E-08  | 20.9 | 49269   | 0.080   | 0.764          |
| rs4149056         | 12  | 21,331,549  | <i>SLCO1B1</i>   | t  | c  | 0.84 | -0.051 | 0.009 | 1.3E-08  | 5.2  | 49269   | 0.432   | 0.094          |
| rs150816132*      | 14  | 80,464,293  | <i>DIO2</i>      | a  | g  | 0.01 | -0.220 | 0.040 | 3.5E-08  | 24.1 | 38640   | 0.453   | 0.435          |
| rs978055*         | 14  | 80,534,869  | <i>DIO2</i>      | a  | t  | 0.38 | 0.038  | 0.007 | 1.1E-08  | 10.5 | 49269   | 0.350   | 0.642          |
| rs225014          | 14  | 80,669,580  | <i>DIO2</i>      | t  | c  | 0.64 | 0.054  | 0.007 | 1.8E-15  | 0.0  | 49269   | 0.759   | 0.006          |
| rs12323871*       | 14  | 101,852,075 | <i>DIO3OS</i>    | t  | c  | 0.82 | -0.047 | 0.008 | 1.4E-08  | 25.7 | 49269   | 0.829   | 0.144          |
| rs11626434        | 14  | 101,998,443 | <i>DIO3OS</i>    | c  | g  | 0.36 | 0.058  | 0.007 | 4.1E-17  | 40.7 | 49269   | 0.908   | 0.340          |
| rs12907106        | 15  | 63,873,658  | <i>USP3</i>      | c  | g  | 0.27 | -0.041 | 0.007 | 3.7E-08  | 0.7  | 49269   | 0.038   | 0.494          |
| rs8063103         | 16  | 12,703,395  | <i>SNX29</i>     | c  | g  | 0.85 | -0.052 | 0.009 | 1.6E-08  | 10.4 | 49269   | 0.064   | 0.934          |
| rs11078333        | 17  | 16,049,626  | <i>NCOR1</i>     | a  | t  | 0.53 | 0.051  | 0.007 | 9.9E-13  | 0.0  | 49269   | 0.956   | 0.746          |
| rs56069042        | 18  | 57,914,644  | <i>MC4R</i>      | a  | g  | 0.96 | 0.106  | 0.019 | 1.2E-08  | 0.0  | 49269   | 0.516   | 0.499          |

Effects, standard errors (SE), p-values (P) and N total are provided for the discovery stage. (\*) additional independent hits of a locus. A1: effect allele; AF1: allele frequency of A1; I2: percentage of total variation across studies that is due to heterogeneity; P GxSex: p-values of gene-by-sex interaction. Bold values of the TSH p-values indicate significance after Bonferroni correction for the 91 independent FT4+TSH SNPs tested ( $p < 5.5E-4$ ).

**Supplementary Table 3: Distribution of sex and age group for hypo- and hyperthyroidism GWAS cases and controls**

| hypothyroidism |        |       |          | hyperthyroidism |        |       |          |
|----------------|--------|-------|----------|-----------------|--------|-------|----------|
| age            | sex    | cases | controls | age             | sex    | cases | controls |
| 0-19           | male   | 0.0%  | 0.7%     | 0-19            | male   | 0.0%  | 0.7%     |
| 0-19           | female | 0.0%  | 0.8%     | 0-19            | female | 0.0%  | 0.8%     |
| 20-39          | male   | 0.2%  | 6.9%     | 20-39           | male   | 0.2%  | 7.1%     |
| 20-39          | female | 0.4%  | 7.7%     | 20-39           | female | 0.3%  | 8.0%     |
| 40-59          | male   | 0.6%  | 17.5%    | 40-59           | male   | 0.6%  | 18.0%    |
| 40-59          | female | 1.3%  | 17.7%    | 40-59           | female | 0.7%  | 18.2%    |
| 60-79          | male   | 1.0%  | 20.0%    | 60-79           | male   | 0.7%  | 20.6%    |
| 60-79          | female | 2.1%  | 18.6%    | 60-79           | female | 0.8%  | 19.2%    |
| 80+            | male   | 0.2%  | 1.5%     | 80+             | male   | 0.1%  | 1.6%     |
| 80+            | female | 0.3%  | 2.3%     | 80+             | female | 0.1%  | 2.4%     |

The % values correspond to the total number of samples in the hypo- and hyperthyroidism analysis, respectively.

**Supplementary Table 4: Genome-wide significant index SNPs for hypo- and hyperthyroidism**

| <i>hypothyroidism</i>  |     |             |                           |    |    |      |        |       |         |      |         |                  |           |  |
|------------------------|-----|-------------|---------------------------|----|----|------|--------|-------|---------|------|---------|------------------|-----------|--|
| SNP                    | Chr | Position    | Locus                     | A1 | A2 | AF1  | Effect | SE    | P       | I2   | N total | P TSH            | Reference |  |
| rs7032019*             | 9   | 100,548,144 | <i>FOXE1</i>              | a  | g  | 0.66 | 0.248  | 0.027 | 5.5E-20 | 11.8 | 53241   | 0.000001229      | 1, 2      |  |
| rs78495697             | 1   | 108,355,719 | <i>VAV3</i>               | t  | c  | 0.09 | 0.316  | 0.041 | 2.6E-14 | 12.6 | 53241   | <b>9.278E-20</b> | 2         |  |
| rs597808               | 12  | 111,973,358 | <i>ATXN2/SH2B3</i>        | a  | g  | 0.51 | 0.180  | 0.026 | 3.5E-12 | 21.9 | 53241   | 2.29E-06         | 2         |  |
| rs75491569             | 1   | 19,836,221  | <i>CAPZB</i>              | t  | c  | 0.16 | -0.238 | 0.037 | 8.7E-11 | 0.0  | 53241   | <b>7.805E-38</b> | 1         |  |
| rs11675342             | 2   | 1,407,628   | <i>TPO</i>                | t  | c  | 0.43 | 0.160  | 0.025 | 1.5E-10 | 0.0  | 53241   | 7.88E-06         | 3         |  |
| rs1382879              | 5   | 76,521,868  | <i>PDE8B</i>              | t  | c  | 0.59 | -0.153 | 0.026 | 2.1E-09 | 0.0  | 48969   | <b>1.51E-115</b> | 1         |  |
| rs2983514              | 6   | 166,050,119 | <i>PDE10A</i>             | a  | g  | 0.67 | 0.154  | 0.027 | 1.6E-08 | 15.5 | 51313   | <b>4.745E-48</b> | 1         |  |
| rs12449792**           | 17  | 43,302,259  | <i>FMNL1</i>              | t  | c  | 0.46 | 0.157  | 0.028 | 2.4E-08 | 0.0  | 46314   | <b>4.619E-08</b> |           |  |
| <i>hyperthyroidism</i> |     |             |                           |    |    |      |        |       |         |      |         |                  |           |  |
| SNP                    | Chr | Position    | Locus                     | A1 | A2 | AF1  | Effect | SE    | P       | I2   | N total | P TSH            | Reference |  |
| rs2046045              | 5   | 76,535,811  | <i>PDE8B</i>              | t  | g  | 0.60 | 0.329  | 0.034 | 4.4E-22 | 57.3 | 50420   | <b>3.72E-117</b> | 1         |  |
| rs17477923             | 15  | 49,711,185  | <i>FAM227B/FGF7</i>       | t  | c  | 0.72 | -0.245 | 0.034 | 6.1E-13 | 28.7 | 48508   | <b>2.572E-33</b> | 1         |  |
| rs11038357             | 11  | 45,237,858  | <i>PRDM11</i>             | a  | t  | 0.28 | 0.235  | 0.035 | 3.1E-11 | 42.1 | 48508   | <b>3.244E-22</b> | 1         |  |
| rs8077245              | 17  | 70,376,177  | <i>SOX9</i>               | t  | g  | 0.58 | 0.205  | 0.033 | 5.0E-10 | 0.0  | 48508   | <b>6.231E-14</b> | 1         |  |
| rs2983514              | 6   | 166,050,119 | <i>PDE10A</i>             | a  | g  | 0.65 | -0.199 | 0.032 | 5.2E-10 | 37.7 | 49745   | <b>4.745E-48</b> | 1         |  |
| rs12138950             | 1   | 19,839,115  | <i>CAPZB</i>              | a  | c  | 0.85 | -0.258 | 0.042 | 5.5E-10 | 64.3 | 51668   | <b>5.789E-38</b> | 1         |  |
| rs925488*              | 9   | 100,546,391 | <i>FOXE1</i>              | a  | g  | 0.65 | 0.190  | 0.033 | 1.1E-08 | 66.0 | 48508   | 6.482E-07        | 1, 2, 3   |  |
| rs66760320             | 6   | 43,906,255  | <i>VEGFA/LOC100132354</i> | t  | c  | 0.27 | 0.192  | 0.035 | 4.4E-08 | 22.6 | 51668   | <b>1.011E-24</b> | 3         |  |

(\*) FT4 locus (p=3E-29). (\*\*) discovered also in TSH, but did not replicate. SE: standard errors; A1: effect allele; AF1: allele frequency of A1; I2: percentage of total variation across studies that is due to heterogeneity. Bold values of TSH indicate genome-wide significance.

References: 1) Porcu et al. 2012 2) Eriksson et al. 2012 3) Gudmundsson et al. 2012

**Supplementary Table 5: Lookup of TSH associated SNPs in Graves' disease and TPOab positivity**

| <i>Graves' disease</i> |     |             |              |    |    |                  |                |
|------------------------|-----|-------------|--------------|----|----|------------------|----------------|
| SNP                    | Chr | Position    | Nearest gene | A1 | A2 | Effect direction | P              |
| rs12089835             | 1   | 19,771,438  | CAPZB        | t  | c  | -                | 0.090          |
| rs10917469             | 1   | 19,843,576  | CAPZB        | a  | g  | -                | 0.005          |
| rs74804879             | 1   | 19,862,320  | CAPZB        | t  | c  | -                | 0.823          |
| rs334725               | 1   | 61,610,049  | NFIA         | a  | g  | +                | 0.206          |
| rs17020122             | 1   | 108,357,391 | VAV3         | t  | c  | -                | 0.112          |
| rs16856540             | 2   | 217,580,413 | IGFBP5       | t  | c  | +                | 0.021          |
| rs13015993             | 2   | 217,625,523 | IGFBP5       | a  | g  | -                | 0.008          |
| rs6724073              | 2   | 218,236,786 | DIRC3        | t  | c  | +                | 0.503          |
| rs1663070              | 3   | 12,239,852  | SYN2         | t  | c  | -                | 0.035          |
| rs28502438             | 3   | 149,220,109 | TM4SF4       | t  | c  | -                | 0.423          |
| rs13100823             | 3   | 185,514,088 | IGF2BP2      | t  | c  | +                | 0.018          |
| rs59381142             | 3   | 193,916,181 | HES1         | a  | g  | -                | 0.924          |
| rs6535624              | 4   | 149,587,905 | NR3C2        | a  | g  | -                | 0.736          |
| rs11732089             | 4   | 149,665,602 | NR3C2        | t  | c  | -                | 0.934          |
| rs1119208              | 5   | 76,488,613  | PDE8B        | t  | c  | +                | 0.407          |
| rs2127387              | 5   | 76,532,571  | PDE8B        | a  | g  | -                | 0.192          |
| rs7702192              | 5   | 76,554,807  | PDE8B        | a  | c  | -                | 0.599          |
| rs1265091              | 6   | 31,108,129  | PSORS1C1     | t  | c  | -                | <b>1.3E-12</b> |
| rs744103               | 6   | 43,805,362  | VEGFA        | a  | t  | +                | 0.332          |
| rs9381266              | 6   | 43,905,037  | LOC100132354 | t  | c  | -                | 0.290          |
| rs9497965              | 6   | 148,521,292 | SASH1        | t  | c  | +                | 0.048          |
| rs73022105             | 6   | 165,973,757 | PDE10A       | t  | c  | -                | 0.707          |
| rs1079418              | 6   | 166,047,034 | PDE10A       | a  | g  | +                | 0.854          |
| rs56009477             | 8   | 23,356,964  | SLC25A37     | a  | g  | -                | 0.269          |
| rs2439301              | 8   | 32,433,013  | NRG1         | a  | g  | +                | 0.321          |
| rs10957494             | 8   | 70,365,025  | SULF1        | a  | g  | -                | 0.287          |
| rs2739067              | 8   | 133,951,991 | TG           | a  | g  | -                | 0.148          |
| rs10814915             | 9   | 4,290,544   | GLIS3        | t  | c  | +                | 0.284          |
| rs9298749              | 9   | 16,214,340  | C9orf92      | a  | c  | +                | 0.377          |
| rs8176645              | 9   | 136,149,098 | ABO          | a  | t  | -                | 0.722          |
| rs11255790             | 10  | 8,682,180   | GATA3        | t  | c  | +                | 0.110          |
| rs4933466              | 10  | 89,849,519  | PTEN         | a  | g  | +                | 0.420          |
| rs12284404             | 11  | 45,228,686  | PRDM11       | a  | g  | +                | 0.986          |
| rs4445669              | 11  | 115,045,237 | CADM1        | t  | c  | +                | 0.055          |
| rs7329958              | 13  | 24,782,080  | SPATA13      | t  | c  | -                | 0.223          |
| rs398745               | 14  | 36,536,181  | LINC00609    | a  | c  | +                | 0.350          |
| rs2254613              | 14  | 36,713,154  | MBIP         | t  | g  | +                | 0.570          |
| rs11159482             | 14  | 81,490,842  | TSHR         | t  | c  | +                | 0.215          |
| rs59334515             | 14  | 81,594,143  | TSHR         | t  | c  | +                | 0.017          |
| rs12893151             | 14  | 81,619,945  | TSHR         | a  | c  | -                | 0.193          |
| rs8015085              | 14  | 93,585,331  | ITPK1        | a  | g  | +                | 0.912          |
| rs17477923             | 15  | 49,711,185  | FAM227B      | t  | c  | +                | 0.764          |
| rs11639111             | 15  | 49,749,735  | FAM227B      | t  | c  | -                | 0.089          |
| rs13329353             | 15  | 89,113,877  | DET1         | t  | c  | -                | 0.795          |
| rs1045476              | 16  | 4,015,313   | ADCY9        | a  | g  | +                | 0.344          |
| rs30227                | 16  | 14,405,428  | MIR365A      | t  | c  | +                | 0.966          |
| rs17767491             | 16  | 79,745,487  | MAF          | a  | g  | -                | 0.001          |
| rs77819282             | 17  | 44,762,589  | NSF          | a  | g  | -                | 0.867          |
| rs1042673              | 17  | 70,121,339  | SOX9         | a  | g  | +                | 0.651          |
| rs963384               | 17  | 70,369,758  | LINC00673    | t  | c  | +                | 0.647          |
| rs4804413              | 19  | 7,222,655   | INSR         | t  | c  | -                | 0.230          |
| rs1203944              | 20  | 22,596,879  | FOXA2        | t  | c  | +                | 0.060          |



| <b>TPOab positivity</b> |     |             |              |    |    |                  |                |
|-------------------------|-----|-------------|--------------|----|----|------------------|----------------|
| SNP                     | Chr | Position    | Nearest gene | A1 | A2 | Effect direction | P              |
| rs12091047              | 1   | 19,771,925  | CAPZB        | t  | c  | -                | 0.187          |
| rs10917469              | 1   | 19,843,576  | CAPZB        | a  | g  | -                | 0.836          |
| rs334725                | 1   | 61,610,049  | NFIA         | a  | g  | -                | 0.788          |
| rs17020122              | 1   | 108,357,391 | VAV3         | t  | c  | +                | <b>7.4E-04</b> |
| rs16856540              | 2   | 217,580,413 | IGFBP5       | t  | c  | +                | 0.313          |
| rs13015993              | 2   | 217,625,523 | IGFBP5       | a  | g  | -                | 0.052          |
| rs6724073               | 2   | 218,236,786 | TNS1         | t  | c  | -                | 0.003          |
| rs1663070               | 3   | 12,239,852  | SYN2         | t  | c  | +                | 0.821          |
| rs9828967               | 3   | 149,226,442 | TM4SF4       | a  | t  | +                | 0.319          |
| rs6767484               | 3   | 185,520,578 | IGF2BP2      | a  | g  | +                | 0.916          |
| rs4578973               | 3   | 193,918,634 | HES1         | t  | c  | +                | 0.524          |
| rs6535624               | 4   | 149,587,905 | NR3C2        | a  | g  | +                | 0.017          |
| rs11732089              | 4   | 149,665,602 | NR3C2        | t  | c  | +                | 0.089          |
| rs1119208               | 5   | 76,488,613  | PDE8B        | t  | c  | -                | 0.957          |
| rs6885099               | 5   | 76,530,349  | PDE8B        | a  | g  | -                | 0.736          |
| rs7702192               | 5   | 76,554,807  | PDE8B        | a  | c  | +                | 0.219          |
| rs12189200              | 5   | 76,658,640  | PDE8B        | t  | c  | -                | 0.080          |
| rs6869902               | 5   | 76,783,252  | WDR41        | a  | c  | -                | 0.810          |
| rs1063646               | 6   | 31,107,648  | PSORS1C1     | t  | c  | +                | 0.528          |
| rs744103                | 6   | 43,805,362  | VEGFA        | a  | t  | -                | 0.991          |
| rs9381266               | 6   | 43,905,037  | C6orf223     | t  | c  | -                | 0.460          |
| rs9497965               | 6   | 148,521,292 | SASH1        | t  | c  | +                | 0.122          |
| rs4709949               | 6   | 165,966,099 | PDE10A       | t  | c  | -                | 0.447          |
| rs1079418               | 6   | 166,047,034 | PDE10A       | a  | g  | -                | 0.128          |
| rs17770799              | 8   | 23,347,851  | ENTPD4       | t  | c  | +                | 0.766          |
| rs2439300               | 8   | 32,433,104  | NRG1         | t  | c  | +                | 0.115          |
| rs7011706               | 8   | 70,362,479  | SULF1        | t  | c  | -                | 0.077          |
| rs2739068               | 8   | 133,952,435 | TG           | t  | g  | -                | 0.055          |
| rs10758594              | 9   | 4,295,583   | GLIS3        | a  | g  | +                | 0.447          |
| rs9298749               | 9   | 16,214,340  | BNC2         | a  | c  | -                | 0.385          |
| rs644234                | 9   | 136,142,217 | ABO          | t  | g  | +                | 0.069          |
| rs11255790              | 10  | 8,682,180   | GATA3        | t  | c  | -                | 0.287          |
| rs4933466               | 10  | 89,849,519  | PTEN         | a  | g  | +                | 0.989          |
| rs7077040               | 10  | 101,281,014 | NKX2-3       | c  | g  | -                | 0.286          |
| rs17723470              | 11  | 45,227,567  | PRDM11       | t  | c  | +                | 0.112          |
| rs4445669               | 11  | 115,045,237 | CADM1        | t  | c  | +                | 0.849          |
| rs4770628               | 13  | 24,782,064  | SPATA13      | a  | g  | -                | <b>1.1E-04</b> |
| rs398745                | 14  | 36,536,181  | BRMS1L       | a  | c  | +                | 0.291          |
| rs2254613               | 14  | 36,713,154  | MBIP         | t  | g  | +                | 0.656          |
| rs2268476               | 14  | 81,592,717  | TSHR         | a  | g  | +                | 0.192          |
| rs9672082               | 14  | 93,572,855  | ITPK1        | t  | c  | +                | 0.114          |
| rs17477923              | 15  | 49,711,185  | C15orf33     | t  | c  | -                | 0.013          |
| rs11639111              | 15  | 49,749,735  | C15orf33     | t  | c  | -                | 0.095          |
| rs13329353              | 15  | 89,113,877  | DET1         | t  | c  | +                | 0.338          |
| rs2072346               | 16  | 4,027,423   | ADCY9        | t  | c  | +                | 0.930          |
| rs30227                 | 16  | 14,405,428  | MKL2         | t  | c  | +                | 0.932          |
| rs17767491              | 16  | 79,745,487  | MAF          | a  | g  | -                | <b>2.2E-05</b> |
| rs183211                | 17  | 44,788,310  | NSF          | a  | g  | +                | 0.963          |
| rs17597856              | 17  | 59,314,176  | BCAS3        | c  | g  | -                | 0.215          |
| rs9915657               | 17  | 70,127,536  | SOX9         | t  | c  | +                | 0.283          |
| rs759563                | 17  | 70,370,888  | SOX9         | t  | c  | +                | 0.287          |
| rs4804416               | 19  | 7,223,848   | INSR         | t  | g  | +                | 0.100          |
| rs1203944               | 20  | 22,596,879  | FOXA2        | t  | c  | +                | 0.623          |

A1: effect allele. Bold values indicate significance ( $p < 0.05$ ) after Bonferroni correction for the number of SNPs per trait tested.

**Supplementary Table 6: Association of *SLC17A4* and *AADAT* hits with T3 and T3/T4 ratio**

| SNP                  | Locus   | A1 | A2 | Effect | SE    | P               | I <sup>2</sup> | N total | N cohorts |
|----------------------|---------|----|----|--------|-------|-----------------|----------------|---------|-----------|
| <b>FT3</b>           |         |    |    |        |       |                 |                |         |           |
| rs9356988            | SLC17A4 | a  | g  | 0.022  | 0.015 | 0.143           | 0              | 10803   | 3         |
| rs137964359          | SLC17A4 | t  | c  | 0.012  | 0.062 | 0.849           | 23.5           | 10803   | 3         |
| rs6854291            | AADAT   | a  | g  | -0.068 | 0.023 | <b>0.003</b>    | 0              | 10803   | 3         |
| <b>TT3</b>           |         |    |    |        |       |                 |                |         |           |
| rs9356988            | SLC17A4 | a  | g  | 0.019  | 0.016 | 0.238           | 0              | 9083    | 2         |
| rs137964359          | SLC17A4 | t  | c  | -0.114 | 0.074 | 0.125           | 0              | 9083    | 2         |
| rs6854291            | AADAT   | a  | g  | -0.049 | 0.025 | 0.047           | 64.2           | 9083    | 2         |
| <b>T3*</b>           |         |    |    |        |       |                 |                |         |           |
| rs9356988            | SLC17A4 | a  | g  | 0.021  | 0.011 | 0.06            | 0              | 19886   | 5         |
| rs137964359          | SLC17A4 | t  | c  | -0.04  | 0.048 | 0.401           | 14.4           | 19886   | 5         |
| rs6854291            | AADAT   | a  | g  | -0.059 | 0.017 | <b>4.46E-04</b> | 10.6           | 19886   | 5         |
| <b>FT3/FT4 ratio</b> |         |    |    |        |       |                 |                |         |           |
| rs9356988            | SLC17A4 | a  | g  | 0.008  | 0.003 | <b>0.004</b>    | 54.9           | 10800   | 3         |
| rs137964359          | SLC17A4 | t  | c  | 0.016  | 0.012 | 0.204           | 0              | 10800   | 3         |
| rs6854291            | AADAT   | a  | g  | -0.028 | 0.004 | <b>1.15E-10</b> | 3.8            | 10800   | 3         |
| <b>TT3/FT4 ratio</b> |         |    |    |        |       |                 |                |         |           |
| rs9356988            | SLC17A4 | a  | g  | 0.009  | 0.003 | <b>0.007</b>    | 0              | 9082    | 2         |
| rs137964359          | SLC17A4 | t  | c  | 0.019  | 0.016 | 0.221           | 55.6           | 9082    | 2         |
| rs6854291            | AADAT   | a  | g  | -0.018 | 0.005 | <b>7.77E-04</b> | 0              | 9082    | 2         |
| <b>T3/FT4 ratio*</b> |         |    |    |        |       |                 |                |         |           |
| rs9356988            | SLC17A4 | a  | g  | 0.009  | 0.002 | <b>8.42E-05</b> | 11.4           | 19882   | 5         |
| rs137964359          | SLC17A4 | t  | c  | 0.017  | 0.01  | 0.079           | 0              | 19882   | 5         |
| rs6854291            | AADAT   | a  | g  | -0.024 | 0.003 | <b>1.24E-12</b> | 25.5           | 19882   | 5         |

SE: standard errors; A1: effect allele; AF1: allele frequency of A1. Bold p values of TSH indicate statistical significance (p<0.05) after Bonferroni correction. FT3: free T3; TT3: total T3;

\* indicates a combined analysis of FT3 and TT3 of disjunct samples.

**Supplementary Table 7: GRS association with hypo- and hyperthyroidism**

| GRS | outcome:quantile          | Effect    | SE    | p        | OR   |
|-----|---------------------------|-----------|-------|----------|------|
| TSH | hypothyroidism:1          | reference |       |          |      |
| TSH | hypothyroidism:2          | 0.272     | 0.087 | 1.82E-03 | 1.31 |
| TSH | hypothyroidism:3          | 0.566     | 0.084 | 1.26E-11 | 1.76 |
| TSH | hypothyroidism:4          | 0.929     | 0.079 | 6.76E-32 | 2.53 |
| TSH | hyperthyroidism:1         | reference |       |          |      |
| TSH | hyperthyroidism:2         | -0.746    | 0.101 | 1.34E-13 | 0.47 |
| TSH | hyperthyroidism:3         | -1.090    | 0.112 | 1.45E-22 | 0.34 |
| TSH | hyperthyroidism:4         | -1.649    | 0.143 | 9.81E-31 | 0.19 |
| FT4 | hypothyroidism:1          | reference |       |          |      |
| FT4 | hypothyroidism:2          | -0.034    | 0.075 | 0.649    | 0.97 |
| FT4 | hypothyroidism:3          | 0.041     | 0.074 | 0.580    | 1.04 |
| FT4 | hypothyroidism:4          | 0.034     | 0.074 | 0.642    | 1.03 |
| FT4 | hyperthyroidism:1         | reference |       |          |      |
| FT4 | hyperthyroidism:2         | -0.064    | 0.114 | 0.575    | 0.94 |
| FT4 | hyperthyroidism:3         | -0.064    | 0.114 | 0.575    | 0.94 |
| FT4 | hyperthyroidism:4         | 0.035     | 0.112 | 0.752    | 1.04 |
| TSH | hypothyroidism:Genescore  | 0.100     | 0.007 | 4.47E-45 | 1.11 |
| TSH | hyperthyroidism:Genescore | -0.179    | 0.011 | 7.90E-60 | 0.84 |
| FT4 | hypothyroidism:Genescore  | 0.004     | 0.006 | 0.535    | 1.00 |
| FT4 | hyperthyroidism:Genescore | 0.004     | 0.009 | 0.642    | 1.00 |

Association results of the genetic risk score (GRS) based on TSH and FT4 with hypo- and hyperthyroidism contrasting the respective quartile of the GRS distribution against the lowest quartile (1). Genescore corresponds to the association results on the continuous GRS scale (0-100). SE: standard error; OR: odds ratio

**Supplementary Table 8: Association results of TSH-based genetic risk score**

| Trait                              | #SNPs in GRS | Effect (SE)      | P         | FDR              | Reference                |
|------------------------------------|--------------|------------------|-----------|------------------|--------------------------|
| Graves' disease                    | 52           | -0.443 (0.104)   | 2.00E-05  | <b>8.50E-05</b>  |                          |
| hypothyroidism                     | 61           | 1.203 (0.060)    | 6.20E-89  | <b>1.10E-87</b>  |                          |
| hyperthyroidism                    | 61           | -1.957 (0.074)   | 4.00E-156 | <b>1.40E-154</b> |                          |
| TPO antibody (case/control)        | 53           | -0.137 (0.081)   | 8.90E-02  | 2.00E-01         | Medici et al. (2014)     |
| goiter                             | 53           | -1.190 (0.110)   | 3.90E-27  | <b>3.40E-26</b>  | Teumer et al. (2011)     |
| thyroid volume                     | 53           | -0.262 (0.020)   | 1.30E-37  | <b>1.60E-36</b>  | Teumer et al. (2011)     |
| anxiety (case/control)             | 53           | -0.116 (0.071)   | 1.00E-01  | 2.10E-01         | Otowa et al. (2016)      |
| anxiety (factor score)             | 52           | 0.002 (0.013)    | 8.80E-01  | 9.30E-01         | Otowa et al. (2016)      |
| type 2 diabetes (DIAGRAM)          | 50           | -0.110 (0.045)   | 1.60E-02  | 5.00E-02         | Morris et al. (2012)     |
| forearm BMD (GEFOS)                | 59           | -0.051 (0.037)   | 1.70E-01  | 3.10E-01         | Zheng et al. (2015)      |
| femoral neck BMD (GEFOS)           | 60           | -0.010 (0.018)   | 5.70E-01  | 7.40E-01         | Zheng et al. (2015)      |
| lumbar spine BMD (GEFOS)           | 60           | -0.004 (0.021)   | 8.50E-01  | 9.30E-01         | Zheng et al. (2015)      |
| body mass index (GIANT)            | 51           | 0.006 (0.009)    | 5.00E-01  | 7.20E-01         | Locke et al. (2015)      |
| waist circumference adjBMI (GIANT) | 51           | -0.022 (0.010)   | 3.30E-02  | 8.80E-02         | Shungin et al. (2015)    |
| waist-hip-ratio adjBMI (GIANT)     | 51           | 4.8E-04 (0.010)  | 9.60E-01  | 9.80E-01         | Shungin et al. (2015)    |
| body height (GIANT)                | 51           | -0.050 (0.007)   | 2.00E-11  | <b>1.40E-10</b>  | Wood et al. (2014)       |
| obesity class 1 (GIANT)            | 50           | 0.026 (0.032)    | 4.20E-01  | 6.30E-01         | Berndt et al. (2013)     |
| obesity class 2 (GIANT)            | 50           | 0.032 (0.049)    | 5.10E-01  | 7.20E-01         | Berndt et al. (2013)     |
| obesity class 3 (GIANT)            | 50           | 0.046 (0.092)    | 6.20E-01  | 7.70E-01         | Berndt et al. (2013)     |
| gout (GUGC)                        | 50           | 0.149 (0.078)    | 5.50E-02  | 1.40E-01         | Köttgen et al. (2013)    |
| uric acid (GUGC)                   | 50           | 0.021 (0.014)    | 1.20E-01  | 2.40E-01         | Köttgen et al. (2013)    |
| IGF-I                              | 50           | -4.2E-04 (0.022) | 9.80E-01  | 9.80E-01         | Teumer et al. (2016)     |
| IGFBP3                             | 50           | -0.045 (0.026)   | 8.00E-02  | 1.90E-01         | Teumer et al. (2016)     |
| HDL (GLGC)                         | 48           | 0.011 (0.012)    | 3.60E-01  | 6.00E-01         | Willer et al. (2013)     |
| LDL (GLGC)                         | 48           | 0.035 (0.013)    | 4.90E-03  | <b>1.90E-02</b>  | Willer et al. (2013)     |
| total cholesterol (GLGC)           | 48           | 0.054 (0.012)    | 1.10E-05  | <b>6.50E-05</b>  | Willer et al. (2013)     |
| triglyceride (GLGC)                | 48           | -0.004 (0.011)   | 7.50E-01  | 9.00E-01         | Willer et al. (2013)     |
| fasting glucose (MAGIC)            | 50           | 0.005 (0.009)    | 5.70E-01  | 7.40E-01         | Dupuis et al. (2010)     |
| HbA1C (MAGIC)                      | 52           | 0.010 (0.009)    | 2.40E-01  | 4.20E-01         | Soranzo et al. (2010)    |
| bipolar disorder (PGC)             | 49           | -0.050 (0.060)   | 4.10E-01  | 6.30E-01         | PGC BD WG (2011)         |
| major depressive disorder (PGC)    | 34           | -0.011 (0.068)   | 8.70E-01  | 9.30E-01         | PGC MDD WG (2011)        |
| kidney function eGFR (CKDGen)      | 48           | -0.010 (0.002)   | 1.40E-05  | <b>7.20E-05</b>  | Pattaro et al. (2016)    |
| kidney function UACR (CKDGen)      | 48           | -0.035 (0.016)   | 3.00E-02  | 8.80E-02         | Teumer et al. (2015)     |
| schizophrenia (PGC)                | 61           | -0.064 (0.025)   | 1.10E-02  | <b>3.80E-02</b>  | Schizophrenia PGC (2011) |
| education years (SSGAC)            | 49           | -0.009           | 8.10E-01  | 9.30E-01         | Rietveld et al. (2013)   |

Bold values indicate significant associations of GRS with the respective trait (false discovery rate < 0.05). Effect provides the change of the unit of the corresponding trait (or log of odd ratio for binary traits) per increase in standard deviation of TSH.

**Supplementary Table 9: Association results of FT4-based genetic risk score**

| Trait                              | #SNPs in GRS | Effect (SE)    | P        | FDR             | Reference                |
|------------------------------------|--------------|----------------|----------|-----------------|--------------------------|
| Graves' disease                    | 25           | -0.225 (0.151) | 1.37E-01 | 3.49E-01        |                          |
| hypothyroidism                     | 31           | 0.078 (0.084)  | 3.52E-01 | 5.60E-01        |                          |
| hyperthyroidism                    | 31           | 0.179 (0.105)  | 8.79E-02 | 3.42E-01        |                          |
| goiter                             | 27           | 0.417 (0.157)  | 7.90E-03 | <b>4.61E-02</b> | Teumer et al. (2011)     |
| thyroid volume                     | 27           | 0.084 (0.029)  | 3.84E-03 | <b>3.36E-02</b> | Teumer et al. (2011)     |
| TPO antibody (case/control)        | 27           | 0.004 (0.113)  | 9.72E-01 | 9.72E-01        | Medici et al. (2014)     |
| anxiety (case/control)             | 27           | -0.238 (0.099) | 1.64E-02 | 8.19E-02        | Otowa et al. (2016)      |
| anxiety (factor score)             | 27           | -0.012 (0.018) | 4.78E-01 | 6.69E-01        | Otowa et al. (2016)      |
| type 2 diabetes (DIAGRAM)          | 27           | -0.056 (0.065) | 3.90E-01 | 5.69E-01        | Morris et al. (2012)     |
| forearm BMD (GEFOS)                | 30           | 0.055 (0.053)  | 2.98E-01 | 5.48E-01        | Zheng et al. (2015)      |
| femoral neck BMD (GEFOS)           | 31           | 0.012 (0.025)  | 6.37E-01 | 7.50E-01        | Zheng et al. (2015)      |
| lumbar spine BMD (GEFOS)           | 31           | 0.044 (0.029)  | 1.29E-01 | 3.49E-01        | Zheng et al. (2015)      |
| body mass index (GIANT)            | 27           | -0.039 (0.013) | 2.74E-03 | <b>3.19E-02</b> | Locke et al. (2015)      |
| waist circumference adjBMI (GIANT) | 27           | -0.001 (0.015) | 9.42E-01 | 9.72E-01        | Shungin et al. (2015)    |
| waist-hip-ratio adjBMI (GIANT)     | 27           | -0.019 (0.015) | 1.94E-01 | 4.54E-01        | Shungin et al. (2015)    |
| body height (GIANT)                | 27           | 0.039 (0.011)  | 2.92E-04 | <b>5.50E-03</b> | Wood et al. (2014)       |
| obesity class 1 (GIANT)            | 27           | -0.044 (0.045) | 3.31E-01 | 5.51E-01        | Berndt et al. (2013)     |
| obesity class 2 (GIANT)            | 27           | -0.014 (0.069) | 8.45E-01 | 9.24E-01        | Berndt et al. (2013)     |
| obesity class 3 (GIANT)            | 27           | 0.008 (0.126)  | 9.50E-01 | 9.72E-01        | Berndt et al. (2013)     |
| gout (GUGC)                        | 27           | 0.173 (0.117)  | 1.40E-01 | 3.49E-01        | Köttgen et al. (2013)    |
| uric acid (GUGC)                   | 27           | -0.029 (0.020) | 1.32E-01 | 3.49E-01        | Köttgen et al. (2013)    |
| IGF-I                              | 27           | 0.036 (0.031)  | 2.41E-01 | 4.68E-01        | Teumer et al. (2016)     |
| IGFBP3                             | 27           | 0.008 (0.037)  | 8.19E-01 | 9.24E-01        | Teumer et al. (2016)     |
| HDL (GLGC)                         | 27           | 0.020 (0.016)  | 2.17E-01 | 4.68E-01        | Willer et al. (2013)     |
| LDL (GLGC)                         | 27           | -0.063 (0.017) | 3.14E-04 | <b>5.50E-03</b> | Willer et al. (2013)     |
| total cholesterol (GLGC)           | 27           | -0.047 (0.017) | 6.07E-03 | <b>4.25E-02</b> | Willer et al. (2013)     |
| triglyceride (GLGC)                | 27           | -0.010 (0.016) | 5.32E-01 | 7.16E-01        | Willer et al. (2013)     |
| fasting glucose (MAGIC)            | 27           | -0.013 (0.013) | 3.27E-01 | 5.51E-01        | Dupuis et al. (2010)     |
| HbA1C (MAGIC)                      | 27           | 0.015 (0.012)  | 2.32E-01 | 4.68E-01        | Soranzo et al. (2010)    |
| bipolar disorder (PGC)             | 27           | -0.162 (0.085) | 5.57E-02 | 2.44E-01        | PGC BD WG (2011)         |
| major depressive disorder (PGC)    | 10           | -0.086 (0.098) | 3.78E-01 | 5.69E-01        | PGC MDD WG (2011)        |
| kidney function eGFR (CKDGen)      | 25           | 0.002 (0.003)  | 6.11E-01 | 7.50E-01        | Pattaro et al. (2016)    |
| kidney function UACR (CKDGen)      | 26           | -0.034 (0.023) | 1.36E-01 | 3.49E-01        | Teumer et al. (2015)     |
| schizophrenia (PGC)                | 31           | -0.020 (0.035) | 5.68E-01 | 7.37E-01        | Schizophrenia PGC (2011) |
| education years (SSGAC)            | 27           | -0.006 (0.013) | 6.43E-01 | 7.50E-01        | Rietveld et al. (2013)   |

Bold values indicate significant associations of GRS with the respective trait (false discovery rate < 0.05). Effect provides the change of the unit of the corresponding trait (or log of odd ratio for binary traits) per increase in standard deviation of FT4.

Supplementary Table 10: Replication results of GWAS SNPs

| <b>TSH</b>  |     |             |                  |    |    |      |                     |             |                       |               |               |            |            |                    |
|-------------|-----|-------------|------------------|----|----|------|---------------------|-------------|-----------------------|---------------|---------------|------------|------------|--------------------|
| SNP         | Chr | Position    | Locus            | A1 | A2 | AF1  | Effect<br>discovery | P discovery | Effect<br>replication | P replication | N replication | P combined | N combined | proxy SNP (R2)     |
| rs12893151  | 14  | 81,619,945  | <i>TSHR</i>      | a  | c  | 0.22 | -0.062              | 1.0E-15     | -0.025                | 1.7E-01       | 9011          | 2.3E-15    | 63299      |                    |
| rs59381142  | 3   | 193,916,181 | <i>HES1</i>      | a  | g  | 0.24 | -0.058              | 1.7E-14     | -0.036                | 3.5E-02       | 9011          | 3.6E-15    | 61059      |                    |
| rs118039499 | 8   | 133,771,635 | <i>TG</i>        | a  | c  | 0.98 | 0.184               | 2.0E-14     | 0.188                 | 2.5E-08       | 17879         | 2.9E-21    | 66615      | rs114322847 (0.87) |
| rs30227     | 16  | 14,405,428  | <i>MIR365A</i>   | t  | c  | 0.61 | -0.047              | 7.6E-14     | -0.042                | 6.1E-05       | 17879         | 2.3E-17    | 72167      | rs30229 (0.91)     |
| rs7329958   | 13  | 24,782,080  | <i>SPATA13</i>   | t  | c  | 0.35 | -0.044              | 1.1E-11     | -0.047                | 1.6E-03       | 9011          | 7.1E-14    | 63299      |                    |
| rs12390237  | X   | 3,612,081   | <i>PRKX</i>      | a  | g  | 0.62 | -0.046              | 1.7E-11     | NA                    | NA            | 0             | 1.7E-11    | 36501      |                    |
| rs1265091   | 6   | 31,108,129  | <i>PSORS1C1</i>  | t  | c  | 0.20 | 0.057               | 3.2E-11     | 0.060                 | 3.3E-05       | 16772         | 5.0E-15    | 64423      | rs1063646 (0.89)   |
| rs4445669   | 11  | 115,045,237 | <i>CADM1</i>     | t  | c  | 0.46 | -0.040              | 5.8E-11     | -0.034                | 1.8E-02       | 9011          | 3.6E-12    | 63299      |                    |
| rs6724073   | 2   | 218,236,786 | <i>DIRC3</i>     | t  | c  | 0.74 | 0.051               | 1.3E-10     | 0.019                 | 2.6E-01       | 9011          | 3.1E-10    | 61058      |                    |
| rs56009477  | 8   | 23,356,964  | <i>SLC25A37</i>  | a  | g  | 0.84 | 0.052               | 3.7E-10     | 0.034                 | 7.7E-02       | 9011          | 1.1E-10    | 63299      |                    |
| rs4933466   | 10  | 89,849,519  | <i>PTEN</i>      | a  | g  | 0.60 | 0.040               | 5.1E-10     | 0.024                 | 1.0E-01       | 9011          | 2.2E-10    | 63299      |                    |
| rs13100823  | 3   | 185,514,088 | <i>IGF2BP2</i>   | t  | c  | 0.31 | -0.041              | 6.8E-10     | -0.050                | 1.3E-03       | 9011          | 4.1E-12    | 63299      |                    |
| rs11255790  | 10  | 8,682,180   | <i>GATA3</i>     | t  | c  | 0.30 | -0.041              | 6.8E-10     | -0.026                | 9.7E-02       | 9011          | 2.5E-10    | 63299      |                    |
| rs9298749   | 9   | 16,214,340  | <i>C9orf92</i>   | a  | c  | 0.59 | -0.039              | 8.8E-10     | -0.029                | 5.4E-02       | 9011          | 1.6E-10    | 63299      |                    |
| rs10957494  | 8   | 70,365,025  | <i>SULF1</i>     | a  | g  | 0.69 | -0.040              | 1.1E-09     | -0.012                | 4.4E-01       | 9011          | 3.6E-09    | 63299      |                    |
| rs77819282  | 17  | 44,762,589  | <i>NSF</i>       | a  | g  | 0.24 | 0.045               | 1.1E-09     | 0.030                 | 1.1E-01       | 7904          | 4.3E-10    | 62192      |                    |
| rs1045476   | 16  | 4,015,313   | <i>ADCY9</i>     | a  | g  | 0.18 | 0.049               | 2.4E-09     | 0.042                 | 3.3E-03       | 17879         | 3.2E-11    | 72167      | rs2531992 (0.82)   |
| rs1157994   | 17  | 59,338,574  | <i>BCAS3</i>     | a  | g  | 0.05 | -0.090              | 5.3E-09     | -0.047                | 1.6E-01       | 9011          | 4.0E-09    | 59243      |                    |
| rs28133*    | 19  | 8,327,502   | <i>CERS4</i>     | t  | c  | 0.08 | 0.072               | 1.1E-08     | 0.014                 | 6.0E-01       | 9011          | 6.0E-08    | 58713      |                    |
| rs55706568* | 17  | 43,292,035  | <i>FMNL1</i>     | c  | g  | 0.55 | -0.038              | 1.1E-08     | 0.002                 | 9.2E-01       | 9011          | 2.5E-07    | 63299      |                    |
| rs28502438  | 3   | 149,220,109 | <i>TM4SF4</i>    | t  | c  | 0.57 | 0.034               | 3.7E-08     | 0.041                 | 5.2E-03       | 9011          | 7.3E-10    | 63299      |                    |
| rs17398234* | 8   | 66,934,902  | <i>DNAJC5B</i>   | t  | g  | 0.97 | -0.100              | 4.3E-08     | -0.027                | 5.0E-01       | 9011          | 1.4E-07    | 63299      |                    |
| <b>FT4</b>  |     |             |                  |    |    |      |                     |             |                       |               |               |            |            |                    |
| rs17185536  | 6   | 100,620,931 | <i>LOC728012</i> | t  | c  | 0.24 | 0.073               | 1.9E-19     | 0.053                 | 3.5E-02       | 4532          | 2.7E-20    | 53801      |                    |
| rs11626434  | 14  | 101,998,443 | <i>DIO3OS</i>    | c  | g  | 0.36 | 0.058               | 4.1E-17     | 0.020                 | 2.6E-01       | 5826          | 1.7E-16    | 55095      |                    |
| rs225014    | 14  | 80,669,580  | <i>DIO2</i>      | t  | c  | 0.64 | 0.054               | 1.8E-15     | 0.033                 | 1.5E-03       | 14702         | 4.6E-17    | 63971      |                    |
| rs11078333  | 17  | 16,049,626  | <i>NCOR1</i>     | a  | t  | 0.53 | 0.051               | 9.9E-13     | 0.021                 | 4.4E-02       | 13408         | 2.0E-12    | 62677      | rs3815038 (0.96)   |
| rs9356988   | 6   | 25,777,481  | <i>SLC17A4</i>   | a  | g  | 0.27 | -0.051              | 3.6E-12     | -0.056                | 4.2E-03       | 5827          | 5.7E-14    | 55096      |                    |
| rs10818937  | 9   | 127,015,440 | <i>NEK6</i>      | t  | c  | 0.31 | -0.048              | 1.3E-11     | -0.018                | 9.3E-02       | 14702         | 4.9E-11    | 63971      |                    |
| rs10946313  | 6   | 19,381,386  | <i>ID4</i>       | t  | c  | 0.63 | 0.046               | 2.3E-11     | 0.032                 | 7.9E-02       | 5827          | 6.2E-12    | 55096      |                    |
| rs67583169  | 8   | 61,212,179  | <i>CA8</i>       | c  | g  | 0.87 | 0.061               | 1.0E-10     | 0.064                 | 2.3E-02       | 4532          | 7.1E-12    | 53801      |                    |
| rs6785807   | 3   | 181,718,601 | <i>SOX2-OT</i>   | a  | g  | 0.15 | -0.059              | 2.5E-10     | -0.041                | 8.5E-02       | 5827          | 6.9E-11    | 55096      |                    |
| rs10119187  | 9   | 4,223,660   | <i>GLIS3</i>     | t  | c  | 0.81 | 0.050               | 4.1E-09     | 0.037                 | 6.0E-02       | 7667          | 8.0E-10    | 56936      |                    |
| rs4954192   | 2   | 135,632,981 | <i>ACMSD</i>     | t  | c  | 0.43 | -0.041              | 8.4E-09     | -0.018                | 6.0E-02       | 17778         | 9.3E-09    | 62680      | rs6430552 (0.96)   |
| rs56069042  | 18  | 57,914,644  | <i>MC4R</i>      | a  | g  | 0.96 | 0.106               | 1.2E-08     | 0.067                 | 8.0E-02       | 8928          | 3.7E-09    | 58197      |                    |
| rs4149056   | 12  | 21,331,549  | <i>SLCO1B1</i>   | t  | c  | 0.84 | -0.051              | 1.3E-08     | -0.042                | 1.0E-03       | 17822         | 6.3E-11    | 67091      |                    |
| rs8063103   | 16  | 12,703,395  | <i>SNX29</i>     | c  | g  | 0.85 | -0.052              | 1.6E-08     | -0.038                | 2.0E-01       | 4532          | 7.8E-09    | 53801      |                    |
| rs73405691* | 6   | 34,468,767  | <i>PACSL1</i>    | a  | g  | 0.87 | 0.056               | 1.6E-08     | -0.002                | 9.2E-01       | 7673          | 2.1E-07    | 56942      |                    |
| rs72783371* | 10  | 13,436,195  | <i>BEND7</i>     | a  | c  | 0.92 | 0.067               | 2.8E-08     | -0.017                | 5.7E-01       | 7596          | 7.9E-07    | 56865      |                    |
| rs11039355  | 11  | 47,737,501  | <i>FNBP4</i>     | t  | c  | 0.34 | -0.039              | 3.5E-08     | -0.038                | 5.7E-04       | 13408         | 7.9E-11    | 62677      | rs1064608 (0.95)   |
| rs12907106  | 15  | 63,873,658  | <i>USP3</i>      | c  | g  | 0.27 | -0.041              | 3.7E-08     | -0.020                | 4.0E-01       | 4532          | 3.7E-08    | 53801      |                    |
| rs951366*   | 1   | 205,685,352 | <i>NUCKS1</i>    | t  | c  | 0.62 | 0.037               | 4.4E-08     | 0.015                 | 2.9E-01       | 8950          | 6.1E-08    | 58219      |                    |

(\*) did not replicate because not all criteria specified in the methods were fulfilled. SE: standard errors; A1: effect allele; AF1: allele frequency of A1. The proxy SNP and its R2 are provided in case a proxy SNP was used (applies for the Health2006 and Inter99 studies only).

## Supplementary References

1. Rietzschel, E.-R. *et al.* Rationale, design, methods and baseline characteristics of the Asklepios Study. *Eur. J. Cardiovasc. Prev. Rehabil.* **14**, 179–91 (2007).
2. Ikram, M. A. *et al.* The Rotterdam Study: 2018 update on objectives, design and main results. *Eur. J. Epidemiol.* **32**, 807–850 (2017).
3. Kreiner-Møller, E., Medina-Gomez, C., Uitterlinden, A. G., Rivadeneira, F. & Estrada, K. Improving accuracy of rare variant imputation with a two-step imputation approach. *Eur. J. Hum. Genet.* **23**, 395–400 (2015).
4. Estrada, K. *et al.* GRIMP: a web- and grid-based tool for high-speed analysis of large-scale genome-wide association using imputed data. *Bioinformatics* **25**, 2750–2 (2009).
5. Pruim, R. J. *et al.* LocusZoom: regional visualization of genome-wide association scan results. *Bioinformatics* **26**, 2336–7 (2010).
